# Supplementary material for: BCl 3 catalyzed Z -selective intramolecular chlorocarbamoylation of alkynes/allenes
Source: Royal Society of Chemistry journal article supplement (doi:10.1039/d4qo01487a), 2024-01-01
Supplement: d4qo01487a1.pdf [file d4qo01487a1.pdf]

*Supporting Information*

**BCl<sub>3</sub> Catalyzed Z-Selective Intramolecular Chlorocarbamylation of  
Alkynes/Allenenes**

Zhantao Yang,<sup>a</sup> Linlin Chen,<sup>a</sup> Yuhang Zhao,<sup>a</sup> Qianhui Chen,<sup>a</sup> Wanjun Zhao,<sup>a</sup> Linfei Li,<sup>a</sup> Boxuan Zhang,<sup>a</sup> Hua Xie,<sup>b</sup> Xiangtao Kong,<sup>\*a</sup> Chun-Hua Yang<sup>\*a</sup>

<sup>a</sup>Henan Key Laboratory of New Opto-electronic Functional Materials, College of Chemistry and Chemical Engineering, Anyang Normal University, 436 Xian'ge Road, Anyang 455000, People's Republic of China

E-mail: kongxt@aynu.edu.cn

09yangchunhua@163.com

<sup>b</sup> State Key Laboratory of Molecular Reaction Dynamics, Dalian Institute of Chemical Physics, Chinese Academy of Sciences, Dalian 116023, People's Republic of China

## Table of Contents

|                                                        |     |
|--------------------------------------------------------|-----|
| 1. General Information .....                           | S3  |
| 2. Synthesis of Substrates.....                        | S3  |
| 3. Typical Procedure for Chlorocarbamylation .....     | S19 |
| 4. Calculation results.....                            | S31 |
| 5. References.....                                     | S32 |
| 6. Copies of NMR Spectra .....                         | S33 |
| 7. X-ray Crystal Structure and Date of <b>2p</b> ..... | S89 |
| 8. X-ray Crystal Structure and Date of <b>2x</b> ..... | S90 |

## 1. General Information

Unless otherwise noted, all reagents were purchased from commercial suppliers and used without further purification. Analytical thin layer chromatography (TLC) was performed on silica gel GF254. Visualization was accomplished by irradiation with UV light at 254 nm or  $\text{KMnO}_4$  stain solution. Column chromatography was performed on silica gel (200 - 300 mesh).  $^1\text{H}$  NMR spectra were recorded on a Bruker DRX-400 spectrometer (400 MHz). Chemical shifts were reported in parts per million (ppm) referenced to 0.0 ppm for tetramethylsilane. Data are reported as follows: chemical shift, multiplicity (s = singlet, d = doublet, t = triplet, q = quartet, m = multiplet, br = broad), coupling constants (Hz) and integration.  $^{13}\text{C}$  NMR spectra were recorded on a Bruker DRX-400 spectrometer (100 MHz) and were fully decoupled by broad band proton decoupling. Chemical shifts were reported in parts per million (ppm) referenced to 77.16 ppm for  $\text{CDCl}_3$ . High resolution mass spectra (HRMS) were recorded on a waters LCT Premierxe<sup>TM</sup> (USA) (with Electron Spray Ionization as mass analyzer). Single-crystal experiments were recorded on Bruker Smart Apex II.

## 2. Synthesis of Substrates

### 2.1 General procedure for the synthesis of substrate 1

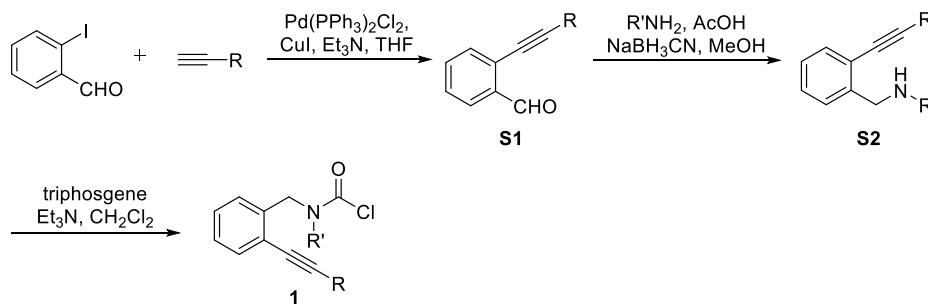

To a mixture of  $\text{Pd}(\text{PPh}_3)_2\text{Cl}_2$  (5 mol %) and 2-iodobenzaldehyde (1 equiv) in  $\text{THF}$  (0.13–0.15 M) was added triethyl amine (3 equiv). After being stirred for 10 min at room temperature, terminal acetylene (1.5 equiv) and  $\text{CuI}$  (5 mol %) were added to the mixture. The resulting mixture was stirred at room temperature for 24 h. The reaction mixture was quenched with saturated aq.  $\text{NH}_4\text{Cl}$ , extracted with  $\text{EtOAc}$  three times, and washed with brine. The organic layers were dried over  $\text{Na}_2\text{SO}_4$  and concentrated under reduced pressure after filtration. The crude mixture was purified by silica-gel column chromatography.

Compound **S1** (1.1 equiv),  $\text{AcOH}$  (1.1 equiv), and  $\text{NaBH}_3\text{CN}$  (1.1 equiv) were added to stirred

mixture of benzylamine (1 equiv) in MeOH (0.1 M). The mixture was stirred at room temperature for 12 h. The solution was then made alkaline with NaOH (1 N) and extracted with EtOAc. The organic layers were collected, dried over MgSO<sub>4</sub>, and evaporated to dryness under reduced pressure to afford compound **S2**.

To a solution of **S2** (1 equiv) in CH<sub>2</sub>Cl<sub>2</sub> was added Et<sub>3</sub>N (2 equiv), followed by triphosgene (0.5 equiv). The resulting mixture was stirred at room temperature for 30 min. The reaction mixture was quenched with H<sub>2</sub>O, extracted with CH<sub>2</sub>Cl<sub>2</sub> three times, and washed with brine. The organic layers were dried over Na<sub>2</sub>SO<sub>4</sub> and concentrated under reduced pressure after filtration. The crude mixture was purified by silica gel column chromatography.

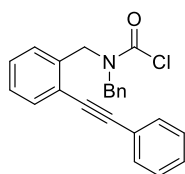

#### **benzyl(2-(phenylethynyl)benzyl)carbamic chloride (1a)**

Compound **1a** was prepared following the general procedure using 2-iodobenzaldehyde (1.8 g, 5.0 mmol) and was isolated as a pale yellow oil (1.3 g, 72% yield, a mixture of two isomers 1: 1) after silica gel column chromatography (Petroleum/EtOAc=20/1).

<sup>1</sup>H NMR (400 MHz, CDCl<sub>3</sub>) δ 7.46 (t, *J* = 7.2 Hz, 1H), 7.31 – 7.11 (m, 13H), 4.85 (s, 1H), 4.76 (s, 1H), 4.56 (s, 1H), 4.43 (s, 1H).

<sup>13</sup>C NMR (100 MHz, CDCl<sub>3</sub>) δ 149.6, 135.8, 135.6, 134.3, 134.2, 131.6, 131.5, 130.6, 130.5, 127.9, 127.80, 127.76, 127.6, 127.50, 127.46, 127.3, 127.2, 127.1, 127.0, 126.83, 126.80, 126.1, 125.7, 122.1, 121.5, 121.4, 94.0, 93.4, 85.6, 85.3, 52.1, 50.7, 50.6, 48.8.

HRMS (ESI) *m/z*: [M+H]<sup>+</sup> calcd for C<sub>23</sub>H<sub>19</sub>ClNO, 360.1155; found: 360.1159.

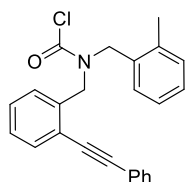

#### **(2-methylbenzyl)(2-(phenylethynyl)benzyl)carbamic chloride (1b)**

Compound **1b** was prepared following the general procedure using 2-iodobenzaldehyde (695 mg, 3.0 mmol) and was isolated as a pale yellow oil (670 mg, 60% yield, a mixture of two isomers 1: 1) after silica gel column chromatography (Petroleum/EtOAc=20/1).

$^1\text{H}$  NMR (400 MHz,  $\text{CDCl}_3$ )  $\delta$  7.48 – 7.39 (m, 1H), 7.36 – 6.93 (m, 12H), 4.82 (s, 1H), 4.80 (s, 1H), 4.56 (s, 1H), 4.51 (s, 1H), 2.09 (s, 1.5H), 1.97 (s, 1.5H).

$^{13}\text{C}$  NMR (100 MHz,  $\text{CDCl}_3$ )  $\delta$  150.1, 149.4, 136.0, 135.6, 135.5, 134.5, 132.0, 131.7, 131.6, 131.4, 130.4, 129.7, 128.0, 127.94, 127.87, 127.5, 127.4, 127.23, 127.16, 127.1, 126.9, 126.8, 126.7, 126.4, 125.5, 125.4, 125.3, 123.9, 122.2, 121.5, 121.4, 93.9, 93.2, 85.4, 85.0, 50.3, 49.9, 48.9, 48.4, 18.1, 17.8.

HRMS (ESI)  $m/z$ :  $[\text{M}+\text{H}]^+$  calcd for  $\text{C}_{24}\text{H}_{21}\text{ClNO}$ , 374.1312; found: 374.1321.

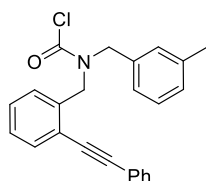

### (3-methylbenzyl)(2-(phenylethynyl)benzyl)carbamic chloride (**1c**)

Compound **1c** was prepared following the general procedure using 2-iodobenzaldehyde (695 mg, 3.0 mmol) and was isolated as a pale yellow oil (650 mg, 58% yield, a mixture of two isomers **1**: **1**) after silica gel column chromatography (Petroleum/EtOAc=20/1).

$^1\text{H}$  NMR (400 MHz,  $\text{CDCl}_3$ )  $\delta$  7.52 – 7.34 (m, 1H), 7.33 – 7.07 (m, 8H), 7.06 – 6.99 (m, 1H), 6.99 – 6.84 (m, 3H), 4.82 (s, 1H), 4.74 (s, 1H), 4.50 (s, 1H), 4.36 (s, 1H), 2.09 (s, 3H).

$^{13}\text{C}$  NMR (100 MHz,  $\text{CDCl}_3$ )  $\delta$  150.74, 150.66, 138.7, 138.6, 137.1, 136.8, 135.33, 135.27, 132.7, 132.6, 131.69, 131.65, 129.4, 129.03, 128.96, 128.95, 128.85, 128.79, 128., 128.7, 128.6, 128.5, 128.4, 128.2, 128.0, 127.9, 126.8, 125.7, 124.2, 123.2, 122.7, 122.5, 95.1, 94.6, 86.8, 86.5, 53.2, 51.9, 51.7, 49.9, 21.4, 21.4.

HRMS (ESI)  $m/z$ :  $[\text{M}+\text{H}]^+$  calcd for  $\text{C}_{24}\text{H}_{21}\text{ClNO}$ , 374.1312; found: 374.1309.

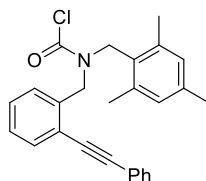

### (2-(phenylethynyl)benzyl)(2,4,6-trimethylbenzyl)carbamic chloride (**1d**)

Compound **1d** was prepared following the general procedure using 2-iodobenzaldehyde (695 mg, 3.0 mmol) and was isolated as a pale yellow oil (660 mg, 55% yield) after silica gel column chromatography (Petroleum/EtOAc=20/1).

$^1\text{H}$  NMR (400 MHz,  $\text{CDCl}_3$ )  $\delta$  7.51 (d,  $J = 7.6$  Hz, 1H), 7.40 (t,  $J = 7.5$  Hz, 1H), 7.34 – 7.24 (m,

7H), 6.86 – 6.70 (m, 2H), 4.74 (s, 2H), 4.68 (s, 2H), 2.15 (s, 3H), 2.05 (s, 6H).

$^{13}\text{C}$  NMR (100 MHz,  $\text{CDCl}_3$ )  $\delta$  150.5, 138.3, 138.1, 137.2, 132.5, 131.5, 129.7, 129.6, 128.9, 128.5, 128.3, 127.9, 127.5, 125.3, 122.7, 121.9, 95.0, 85.9, 49.5, 45.9, 20.8, 19.6.

HRMS (ESI)  $m/z$ :  $[\text{M}+\text{H}]^+$  calcd for  $\text{C}_{26}\text{H}_{25}\text{ClNO}$ , 402.1625; found:402.1629.

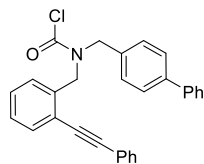

### **[(1,1'-biphenyl)-4-ylmethyl(2-(phenylethynyl)benzyl)carbamic chloride (1e)**

Compound **1e** was prepared following the general procedure using 2-iodobenzaldehyde (695 mg, 3.0 mmol) and was isolated as a pale yellow oil (820 mg, 63% yield, a mixture of two isomers 1: 1) after silica gel column chromatography (Petroleum/EtOAc=20/1).

$^1\text{H}$  NMR (400 MHz,  $\text{CDCl}_3$ )  $\delta$  7.61 – 7.47 (m, 5H), 7.47 – 7.27 (m, 10H), 7.25 – 7.21 (m, 3H), 4.99 (s, 1H), 4.90 (s, 1H), 4.71 (s, 1H), 4.57 (s, 1H).

$^{13}\text{C}$  NMR (100 MHz,  $\text{CDCl}_3$ )  $\delta$  150.7, 141.0, 140.8, 140.5, 140.4, 136.9, 136.6, 134.3, 134.2, 132.6, 132.5, 131.54, 131.51, 128.99, 128.98, 128.9, 128.79, 128.78, 128.6, 128.5, 128.4, 128.3, 127.9, 127.6, 127.50, 127.48, 127.4, 127.0, 126.8, 123.2, 122.6, 122.5, 95.0, 94.4, 86.7, 86.3, 52.8, 51.5, 51.4, 49.7.

HRMS (ESI)  $m/z$ :  $[\text{M}+\text{H}]^+$  calcd for  $\text{C}_{29}\text{H}_{23}\text{ClNO}$ , 436.1468; found: 436.1469.

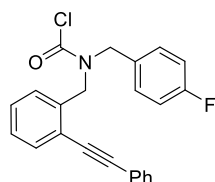

### **(4-fluorobenzyl)(2-(phenylethynyl)benzyl)carbamic chloride (1f)**

Compound **1f** was prepared following the general procedure using 2-iodobenzaldehyde (695 mg, 3.0 mmol) and was isolated as a pale yellow oil (635 mg, 56% yield, a mixture of two isomers 1: 1) after silica gel column chromatography (Petroleum/EtOAc=20/1).

$^1\text{H}$  NMR (400 MHz,  $\text{CDCl}_3$ )  $\delta$  7.55 (dd,  $J = 12.2, 4.8$  Hz, 1H), 7.42 – 7.29 (m, 8H), 7.28 – 7.19 (m, 2H), 6.93 (t,  $J = 8.6$  Hz, 2H), 4.95 (s, 1H), 4.85 (s, 1H), 4.63 (s, 1H), 4.49 (s, 1H).

$^{13}\text{C}$  NMR (100 MHz,  $\text{CDCl}_3$ )  $\delta$  162.47 (dd,  $J = 246.7, 14.7$  Hz), 150.7, 150.5, 136.8, 136.5, 132.7, 132.6, 131.5, 131.2 (d,  $J = 3.1$  Hz), 131.0 (d,  $J = 3.1$  Hz), 130.4, 130.4, 129.0, 128.9 (d,  $J = 5.7$  Hz), 128.7 (d,  $J = 9.6$  Hz), 128.44, 128.37, 128.2, 128.0, 126.9, 123.2, 122.5, 115.8 (d,  $J = 5.6$  Hz),

115.6 (d,  $J = 5.6$  Hz), 95.0, 94.4, 86.7, 86.3, 52.4, 51.5, 51.0, 49.7.

HRMS (ESI)  $m/z$ :  $[M+H]^+$  calcd for  $C_{23}H_{18}ClFNO$ , 378.1061; found: 378.1048.

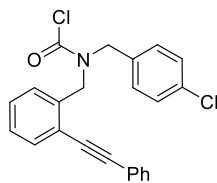

**(4-chlorobenzyl)(2-(phenylethynyl)benzyl)carbamic chloride (1g)**

Compound **1g** was prepared following the general procedure using 2-iodobenzaldehyde (695 mg, 3.0 mmol) and was isolated as a pale yellow oil (650 mg, 55% yield, a mixture of two isomers 1: 1) after silica gel column chromatography (Petroleum/EtOAc=20/1).

$^1H$  NMR (400 MHz,  $CDCl_3$ )  $\delta$  7.46 (dd,  $J = 12.6, 4.9$  Hz, 1H), 7.35 – 7.20 (m, 7H), 7.19 – 7.09 (m, 4H), 7.06 (d,  $J = 8.4$  Hz, 1H), 4.85 (s, 1H), 4.76 (s, 1H), 4.54 (s, 1H), 4.39 (s, 1H).

$^{13}C$  NMR (100 MHz,  $CDCl_3$ )  $\delta$  150.7, 150.6, 136.7, 136.4, 134.1, 133.9, 133.81, 133.78, 132.7, 132.6, 131.6, 129.9, 129.1, 129.0, 128.8, 128.7, 128.5, 128.4, 128.3, 128.1, 127.0, 123.3, 122.6, 122.5, 95.1, 94.5, 86.7, 86.3, 52.4, 51.6, 51.0, 49.7.

HRMS (ESI)  $m/z$ :  $[M+H]^+$  calcd for  $C_{23}H_{18}Cl_2NO$ , 394.0765; found: 394.0768.

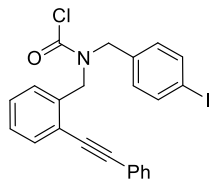

**(4-iodobenzyl)(2-(phenylethynyl)benzyl)carbamic chloride (1h)**

Compound **1h** was prepared following the general procedure using 2-iodobenzaldehyde (695 mg, 3.0 mmol) and was isolated as a yellow oil (725 mg, 50% yield, a mixture of two isomers 1: 1) after silica gel column chromatography (Petroleum/EtOAc=20/1).

$^1H$  NMR (400 MHz,  $CDCl_3$ )  $\delta$  7.46 (t,  $J = 9.5$  Hz, 3H), 7.27 (ddd,  $J = 9.9, 8.2, 5.3$  Hz, 7H), 7.14 (d,  $J = 3.6$  Hz, 1H), 6.89 (dd,  $J = 19.4, 8.0$  Hz, 2H), 4.84 (s, 1H), 4.75 (s, 1H), 4.50 (s, 1H), 4.36 (s, 1H).

$^{13}C$  NMR (100 MHz,  $CDCl_3$ )  $\delta$  149.6, 149.5, 136.9, 135.6, 135.3, 133.9, 131.6, 131.5, 130.5, 129.3, 128.0, 127.9, 127.7, 127.6, 127.5, 127.4, 127.2, 127.0, 126.0, 122.2, 121.6, 121.4, 94.0, 93.4, 92.7, 92.3, 85.6, 85.2, 51.5, 50.5, 50.0, 48.6.

HRMS (ESI)  $m/z$ :  $[M+H]^+$  calcd for  $C_{23}H_{18}ClINO$ , 486.0122; found: 486.0128.

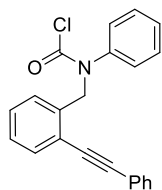

**phenyl(2-(phenylethynyl)benzyl)carbamic chloride (1i)**

Compound **1i** was prepared following the general procedure using 2-iodobenzaldehyde (695 mg, 3.0 mmol) and was isolated as a pale yellow oil (675 mg, 65% yield) after silica gel column chromatography (Petroleum/EtOAc=20/1).

$^1\text{H}$  NMR (400 MHz,  $\text{CDCl}_3$ )  $\delta$  7.42 – 7.30 (m, 3H), 7.27 – 7.18 (m, 4H), 7.14 (dd,  $J = 5.6, 3.7$  Hz, 5H), 7.04 – 6.86 (m, 2H), 5.09 (s, 2H).

$^{13}\text{C}$  NMR (100 MHz,  $\text{CDCl}_3$ )  $\delta$  149.9, 141.3, 136.9, 132.6, 131.7, 129.7, 129.3, 128.7, 128.6, 128.4, 128.1, 123.4, 122.9, 94.3, 86.7, 54.5.

HRMS (ESI)  $m/z$ :  $[\text{M}+\text{H}]^+$  calcd for  $\text{C}_{22}\text{H}_{17}\text{ClNO}$ , 346.0999; found: 346.1012.

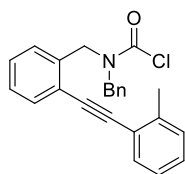

**benzyl(2-(o-tolylethynyl)benzyl)carbamic chloride (1j)**

Compound **1j** was prepared following the general procedure using 2-iodobenzaldehyde (695 mg, 3.0 mmol) and was isolated as a pale yellow oil (730 mg, 65% yield, a mixture of two isomers 1: 1) after silica gel column chromatography (Petroleum/EtOAc=20/1).

$^1\text{H}$  NMR (400 MHz,  $\text{CDCl}_3$ )  $\delta$  7.49 – 7.37 (m, 1H), 7.30 – 6.94 (m, 12H), 4.83 (s, 1H), 4.75 (s, 1H), 4.55 (s, 1H), 4.43 (s, 1H), 2.18 (s, 1.5H), 2.14 (s, 1.5H).

$^{13}\text{C}$  NMR (100 MHz,  $\text{CDCl}_3$ )  $\delta$  149.6, 149.5, 138.94, 138.91, 135.6, 135.4, 134.2, 134.1, 131.5, 131.4, 130.92, 130.89, 128.44, 128.36, 127.8, 127.7, 127.6, 127.5, 127.4, 127.1, 127.0, 126.9, 126.8, 126.7, 126.1, 125.2, 124.6, 124.5, 122.1, 121.45, 121.37, 93.1, 92.5, 89.4, 89.1, 52.3, 50.9, 50.6, 48.8, 19.7, 19.6.

HRMS (ESI)  $m/z$ :  $[\text{M}+\text{H}]^+$  calcd for  $\text{C}_{24}\text{H}_{21}\text{ClNO}$ , 374.1312; found: 374.1314.

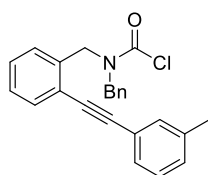



### benzyl(2-(m-tolylethynyl)benzyl)carbamic chloride (**1k**)

Compound **1k** was prepared following the general procedure using 2-iodobenzaldehyde (695 mg, 3.0 mmol) and was isolated as a pale yellow oil (700 mg, 62% yield, a mixture of two isomers 1:1) after silica gel column chromatography (Petroleum/EtOAc=20/1).

$^1\text{H}$  NMR (400 MHz,  $\text{CDCl}_3$ )  $\delta$  7.57 – 7.50 (m, 1H), 7.41 – 7.22 (m, 8H), 7.20 – 7.02 (m, 4H), 4.94 (s, 1H), 4.86 (s, 1H), 4.66 (s, 1H), 4.52 (s, 1H), 2.33 (s, 1.5H), 2.29 (s, 1.5H).

$^{13}\text{C}$  NMR (100 MHz,  $\text{CDCl}_3$ )  $\delta$  150.7, 138.1, 138.0, 137.0, 136.7, 135.44, 135.37, 132.7, 132.6, 132.2, 129.64, 129.56, 129.0, 128.91, 128.89, 128.84, 128.77, 128.7, 128.6, 128.35, 128.28, 128.2, 127.94, 127.92, 127.2, 126.8, 123.3, 122.6, 122.5, 95.3, 94.8, 86.4, 86.1, 53.2, 51.9, 51.7, 49.9, 21.3.

HRMS (ESI)  $m/z$ :  $[\text{M}+\text{H}]^+$  calcd for  $\text{C}_{24}\text{H}_{21}\text{ClNO}$ , 374.1312; found: 374.1324.

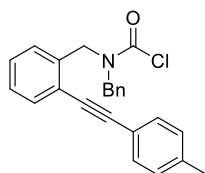

### benzyl(2-(p-tolylethynyl)benzyl)carbamic chloride (**1l**)

Compound **1l** was prepared following the general procedure using 2-iodobenzaldehyde (695 mg, 3.0 mmol) and was isolated as a pale yellow oil (750 mg, 67% yield, a mixture of two isomers 1:1) after silica gel column chromatography (Petroleum/EtOAc=20/1).

$^1\text{H}$  NMR (400 MHz,  $\text{CDCl}_3$ )  $\delta$  7.54 – 7.46 (m, 1H), 7.38 – 7.13 (m, 10H), 7.06 (dd,  $J = 11.2, 8.1$  Hz, 2H), 4.91 (s, 1H), 4.83 (s, 1H), 4.61 (s, 1H), 4.48 (s, 1H), 2.30 (s, 1.5H), 2.30 (s, 1.5H).

$^{13}\text{C}$  NMR (100 MHz,  $\text{CDCl}_3$ )  $\delta$  149.4, 137.7, 137.6, 135.7, 135.4, 134.3, 134.2, 131.5, 131.4, 130.42, 130.37, 128.04, 127.97, 127.74, 127.70, 127.6, 127.4, 127.0, 126.9, 126.8, 126.7, 126.0, 125.7, 122.2, 121.6, 118.4, 94.2, 93.7, 85.0, 84.7, 52.0, 50.7, 50.5, 48.8, 20.4.

HRMS (ESI)  $m/z$ :  $[\text{M}+\text{H}]^+$  calcd for  $\text{C}_{24}\text{H}_{21}\text{ClNO}$ , 374.1312; found: 374.1318.

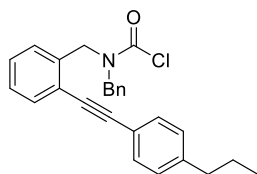

### benzyl(2-((4-propylphenyl)ethynyl)benzyl)carbamic chloride (**1m**)

Compound **1m** was prepared following the general procedure using 2-iodobenzaldehyde (695 mg,

3.0 mmol) and was isolated as a pale yellow oil (760 mg, 63% yield, a mixture of two isomers 1: 1) after silica gel column chromatography (Petroleum/EtOAc=20/1).

$^1\text{H}$  NMR (400 MHz,  $\text{CDCl}_3$ )  $\delta$  7.48 – 7.39 (m, 1H), 7.32 – 7.07 (m, 10H), 7.01 (dd,  $J = 12.3, 8.1$  Hz, 2H), 4.85 (s, 1H), 4.76 (s, 1H), 4.57 (s, 1H), 4.43 (s, 1H), 2.55 – 2.42 (m, 2H), 1.62 – 1.45 (m, 2H), 0.85 (t,  $J = 7.3$  Hz, 3H).

$^{13}\text{C}$  NMR (100 MHz,  $\text{CDCl}_3$ )  $\delta$  149.6, 149.6, 142.6, 142.5, 135.7, 135.5, 134.32, 134.25, 131.5, 131.4, 130.5, 130.4, 127.79, 127.76, 127.73, 127.68, 127.5, 127.4, 127.0, 126.8, 126.1, 125.6, 122.3, 121.6, 118.7, 94.3, 93.1, 85.1, 84.7, 52.1, 50.8, 50.6, 48.9, 36.9, 23.3, 12.7.

HRMS (ESI)  $m/z$ :  $[\text{M}+\text{H}]^+$  calcd for  $\text{C}_{26}\text{H}_{25}\text{ClNO}$ , 402.1625; found:402.1628.

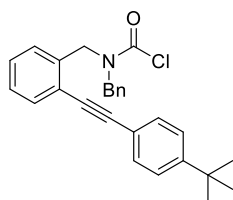

#### benzyl(2-((4-(tert-butyl)phenyl)ethynyl)benzyl)carbamic chloride (**1n**)

Compound **1n** was prepared following the general procedure using 2-iodobenzaldehyde (695 mg, 3.0 mmol) and was isolated as a pale yellow oil (685 mg, 55% yield, a mixture of two isomers 1: 1) after silica gel column chromatography (Petroleum/EtOAc=20/1).

$^1\text{H}$  NMR (400 MHz,  $\text{CDCl}_3$ )  $\delta$  7.49 – 7.39 (m, 1H), 7.32 – 7.05 (m, 12H), 4.84 (s, 1H), 4.75 (s, 1H), 4.56 (s, 1H), 4.42 (s, 1H), 1.21 (s, 9H).

$^{13}\text{C}$  NMR (100 MHz,  $\text{CDCl}_3$ )  $\delta$  150.9, 150.8, 149.6, 149.5, 135.7, 135.5, 134.3, 134.2, 131.6, 131.5, 130.32, 130.28, 127.8, 127.75, 127.70, 127.66, 127.5, 127.0, 126.8, 126.1, 125.6, 124.3, 124.2, 122.3, 121.6, 118.5, 94.2, 93.7, 85.0, 84.7, 52.1, 50.8, 50.7, 48.9, 33.7, 30.1.

HRMS (ESI)  $m/z$ :  $[\text{M}+\text{H}]^+$  calcd for  $\text{C}_{27}\text{H}_{27}\text{ClNO}$ , 416.1781; found:416.1789.

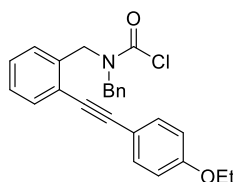

#### benzyl(2-((4-ethoxyphenyl)ethynyl)benzyl)carbamic chloride (**1o**)

Compound **1o** was prepared following the general procedure using 2-iodobenzaldehyde (695 mg, 3.0 mmol) and was isolated as a pale yellow oil (600 mg, 50% yield, a mixture of two isomers 1: 1) after silica gel column chromatography (Petroleum/EtOAc=20/1).

$^1\text{H}$  NMR (400 MHz,  $\text{CDCl}_3$ )  $\delta$  7.44 – 7.24 (m, 1H), 7.24 – 6.98 (m, 10H), 6.63 (dd,  $J = 10.9, 8.8$  Hz, 2H), 4.77 (s, 1H), 4.68 (s, 1H), 4.47 (s, 1H), 4.34 (s, 1H), 3.81 (q,  $J = 6.8$  Hz, 2H), 1.22 (t,  $J = 7.0$  Hz, 3H).

$^{13}\text{C}$  NMR (100 MHz,  $\text{CDCl}_3$ )  $\delta$  159.4, 159.3, 150.7, 150.6, 136.6, 136.4, 135.43, 135.37, 133.2, 133.1, 132.5, 132.4, 128.90, 128.86, 128.6, 128.13, 128.10, 127.90, 127.88, 127.2, 126.8, 123.6, 122.9, 114.6, 114.5, 95.3, 94.7, 85.5, 85.1, 63.6, 63.6, 53.1, 51.8, 51.7, 50.0, 14.8.

HRMS (ESI)  $m/z$ :  $[\text{M}+\text{H}]^+$  calcd for  $\text{C}_{25}\text{H}_{23}\text{ClNO}_2$ , 404.1417; found: 404.1429.

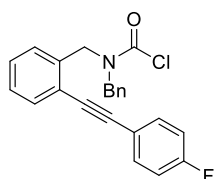

### benzyl(2-((4-fluorophenyl)ethynyl)benzyl)carbamic chloride (**1p**)

Compound **1p** was prepared following the general procedure using 2-iodobenzaldehyde (695 mg, 3.0 mmol) and was isolated as a pale yellow oil (655 mg, 58% yield, a mixture of two isomers 1: 1) after silica gel column chromatography (Petroleum/EtOAc=20/1).

$^1\text{H}$  NMR (400 MHz,  $\text{CDCl}_3$ )  $\delta$  7.50 (t,  $J = 6.9$  Hz, 1H), 7.31 – 7.15 (m, 10H), 6.97 – 6.85 (m, 2H), 4.90 (s, 1H), 4.80 (s, 1H), 4.58 (s, 1H), 4.47 (s, 1H).

$^{13}\text{C}$  NMR (100 MHz,  $\text{CDCl}_3$ )  $\delta$  162.7 (dd,  $J = 250.2, 4.9$  Hz), 150.5, 137.0, 136.8, 135.5, 135.4, 133.8 (d,  $J = 7.9$  Hz), 133.7 (d,  $J = 7.6$  Hz), 132.8, 132.7, 129.2, 129.1, 129.02, 128.95, 128.5, 128.3 (d,  $J = 14.4$  Hz), 128.0 (d,  $J = 11.7$  Hz), 127.2, 123.1, 122.4, 118.92, 118.89, 115.9 (d,  $J = 9.0$  Hz), 115.7 (d,  $J = 9.0$  Hz), 94.1, 93.6, 86.7, 86.4, 53.0, 51.8, 51.8, 49.9.

$^{19}\text{F}$  NMR (377 MHz,  $\text{CDCl}_3$ )  $\delta$  -109.55, -109.72.

HRMS (ESI)  $m/z$ :  $[\text{M}+\text{H}]^+$  calcd for  $\text{C}_{23}\text{H}_{18}\text{ClFNO}$ , 378.1061; found: 378.1079.

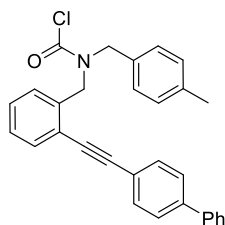

### (2-([1,1'-biphenyl]-4-ylethynyl)benzyl)(4-methylbenzyl)carbamic chloride (**1q**)

Compound **1q** was prepared following the general procedure using 2-iodobenzaldehyde (695 mg, 3.0 mmol) and was isolated as a pale yellow oil (860 mg, 64% yield, a mixture of two isomers 1:

1) after silica gel column chromatography (Petroleum/EtOAc=20/1).

$^1\text{H}$  NMR (400 MHz,  $\text{CDCl}_3$ )  $\delta$  7.53 – 7.39 (m, 5H), 7.39 – 7.31 (m, 3H), 7.30 – 7.19 (m, 5H), 7.14 – 7.02 (m, 2H), 6.99 (d,  $J$  = 8.0 Hz, 2H), 4.85 (s, 1H), 4.77 (s, 1H), 4.53 (s, 1H), 4.40 (s, 1H), 2.20 (s, 1.5H), 2.20 (s, 1.5H).

$^{13}\text{C}$  NMR (100 MHz,  $\text{CDCl}_3$ )  $\delta$  150.7, 141.4, 141.3, 140.31, 140.27, 137.9, 137.7, 137.0, 136.8, 132.7, 132.6, 132.4, 132.2, 132.13, 132.08, 129.60, 129.57, 129.0, 128.9, 128.7, 128.1, 127.9, 127.84, 127.80, 127.2, 127.1, 127.0, 126.8, 123.2, 122.5, 121.6, 95.0, 94.4, 87.5, 87.1, 52.9, 51.6, 51.5, 49.7, 21.22, 21.20.

HRMS (ESI)  $m/z$ :  $[\text{M}+\text{H}]^+$  calcd for  $\text{C}_{30}\text{H}_{25}\text{ClNO}$ , 450.1625; found: 450.1629.

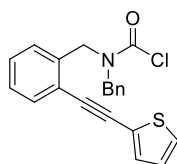

#### benzyl(2-(thiophen-2-ylethynyl)benzyl)carbamic chloride (**1r**)

Compound **1r** was prepared following the general procedure using 2-iodobenzaldehyde (695 mg, 3.0 mmol) and was isolated as a pale yellow oil (635 mg, 58% yield, a mixture of two isomers 1:

1) after silica gel column chromatography (Petroleum/EtOAc=20/1).

$^1\text{H}$  NMR (400 MHz,  $\text{CDCl}_3$ )  $\delta$  7.58 – 7.48 (m, 1H), 7.41 – 7.21 (m, 9H), 7.15 (dd,  $J$  = 22.8, 3.0 Hz, 1H), 7.03 – 6.95 (m, 1H), 4.91 (s, 1H), 4.81 (s, 1H), 4.66 (s, 1H), 4.52 (s, 1H).

$^{13}\text{C}$  NMR (100 MHz,  $\text{CDCl}_3$ )  $\delta$  150.7, 150.6, 136.8, 136.5, 135.3, 135.2, 132.6, 132.51, 132.45, 132.4, 129.1, 129.0, 128.94, 128.86, 128.8, 128.6, 128.2, 127.9, 127.84, 127.78, 127.3, 127.21, 127.17, 126.9, 122.8, 122.6, 122.1, 90.4, 90.0, 88.2, 87.7, 53.3, 51.9, 51.7, 50.0.

HRMS (ESI)  $m/z$ :  $[\text{M}+\text{H}]^+$  calcd for  $\text{C}_{21}\text{H}_{17}\text{ClNOS}$ , 366.0719; found: 366.0727.

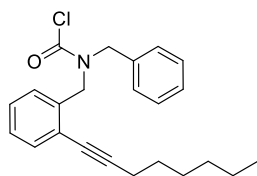

#### benzyl(2-(oct-1-yn-1-yl)benzyl)carbamic chloride (**1s**)

Compound **1s** was prepared following the general procedure using 2-iodobenzaldehyde (695 mg, 3.0 mmol) and was isolated as a pale yellow oil (630 mg, 57% yield, a mixture of two isomers 1:

1) after silica gel column chromatography (Petroleum/EtOAc=20/1).

$^1\text{H}$  NMR (400 MHz,  $\text{CDCl}_3$ )  $\delta$  7.35 – 7.08 (m, 9H), 4.75 (s, 1H), 4.67 (s, 1H), 4.53 (s, 1H), 4.40 (s,

1H), 2.24 (t,  $J = 7.1$  Hz, 1H), 2.17 (t,  $J = 7.1$  Hz, 1H), 1.45 – 1.30 (m, 2H), 1.29 – 1.11 (m, 6H), 0.79 (t,  $J = 6.9$  Hz, 3H).

$^{13}\text{C}$  NMR (100 MHz,  $\text{CDCl}_3$ )  $\delta$  150.7, 150.5, 136.8, 136.5, 135.5, 132.6, 132.5, 128.79, 128.76, 128.5, 128.12, 128.08, 127.94, 127.88, 127.7, 127.1, 126.5, 124.0, 123.3, 96.6, 96.1, 78.0, 77.7, 53.1, 51.84, 51.78, 50.0, 31.3, 28.7, 28.6, 28.6, 22.6, 19.6, 19.5, 14.1.

HRMS (ESI)  $m/z$ :  $[\text{M}+\text{H}]^+$  calcd for  $\text{C}_{23}\text{H}_{27}\text{ClNO}$ , 368.1781; found: 368.1779.

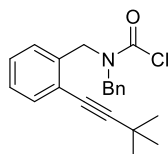

### benzyl(2-(3,3-dimethylbut-1-yn-1-yl)benzyl)carbamate (1t)

Compound **1t** was prepared following the general procedure using 2-iodobenzaldehyde (695 mg, 3.0 mmol) and was isolated as a pale yellow oil (610 mg, 60% yield, a mixture of two isomers 1: 1) after silica gel column chromatography (Petroleum/EtOAc=20/1).

$^1\text{H}$  NMR (400 MHz,  $\text{CDCl}_3$ )  $\delta$  7.42 – 7.22 (m, 9H), 4.84 (s, 1H), 4.78 (s, 1H), 4.62 (s, 1H), 4.49 (s, 1H), 1.22 (s, 4.5H), 1.16 (s, 4.5H).

$^{13}\text{C}$  NMR (100 MHz,  $\text{CDCl}_3$ )  $\delta$  150.7, 150.6, 136.4, 136.2, 135.4, 132.5, 132.4, 128.80, 128.75, 128.5, 128.1, 128.0, 127.81, 127.77, 127.6, 127.0, 126.1, 123.8, 123.1, 104.6, 104.0, 76.3, 76.1, 53.0, 51.7, 51.6, 50.0, 30.8, 30.7, 28.1, 28.0.

HRMS (ESI)  $m/z$ :  $[\text{M}+\text{H}]^+$  calcd for  $\text{C}_{21}\text{H}_{23}\text{ClNO}$ , 340.1468; found: 340.1476.

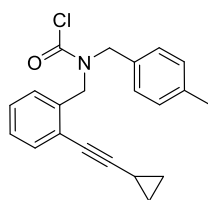

### (2-(cyclopropylethynyl)benzyl)(4-methylbenzyl)carbamate (1u)

Compound **1u** was prepared following the general procedure using 2-iodobenzaldehyde (695 mg, 3.0 mmol) and was isolated as a pale yellow oil (600 mg, 60% yield, a mixture of two isomers 1: 1) after silica gel column chromatography (Petroleum/EtOAc=20/1).

$^1\text{H}$  NMR (400 MHz,  $\text{CDCl}_3$ )  $\delta$  7.43 – 7.35 (m, 1H), 7.30 – 7.19 (m, 3H), 7.19 – 7.10 (m, 4H), 4.79 (s, 1H), 4.70 (s, 1H), 4.56 (s, 1H), 4.43 (s, 1H), 2.35 (s, 1.5H), 2.34 (s, 1.5H), 1.45 – 1.29 (m, 1H), 0.91 – 0.75 (m, 2H), 0.74 – 0.59 (m, 2H).

$^{13}\text{C}$  NMR (100 MHz,  $\text{CDCl}_3$ )  $\delta$  150.3, 150.1, 137.6, 137.4, 136.6, 136.4, 132.4, 132.3, 132.2,

132.1, 129.2, 129.1, 128.4, 128.3, 127.8, 127.7, 127.6, 127.4, 127.0, 126.3, 123.6, 122.9, 99.2, 98.7, 73.0, 72.7, 52.5, 51.3, 51.2, 49.6, 20.92, 20.88, 8.5, 8.4, 0.02, 0.00.

HRMS (ESI)  $m/z$ :  $[M+H]^+$  calcd for  $C_{21}H_{21}ClNO$ , 338.1312; found: 338.1315.

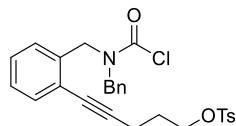

**5-(2-((benzyl(chlorocarbonyl)amino)methyl)phenyl)pent-4-yn-1-yl 4-methylbenzenesulfonate (1v)**

Compound **1v** was prepared following the general procedure using 2-iodobenzaldehyde (695 mg, 3.0 mmol) and was isolated as a pale yellow oil (965 mg, 65% yield, a mixture of two isomers 1: 1) after silica gel column chromatography (Petroleum/EtOAc=20/1).

$^1H$  NMR (400 MHz,  $CDCl_3$ )  $\delta$  7.86 – 7.69 (m, 2H), 7.38 – 7.27 (m, 8H), 7.25 – 7.18 (m, 3H), 4.77 (s, 1H), 4.66 (s, 1H), 4.58 (s, 1H), 4.47 (s, 1H), 4.07 (dt,  $J = 14.1, 6.0$  Hz, 2H), 2.51 – 2.30 (m, 5H), 1.90 – 1.69 (m, 2H).

$^{13}C$  NMR (100 MHz,  $CDCl_3$ )  $\delta$  150.7, 150.5, 144.8, 136.7, 136.5, 135.3, 132.9, 132.8, 132.6, 129.9, 128.8, 128.8, 128.6, 128.4, 128.4, 128.1, 128.0, 127.9, 127.7, 127.0, 126.7, 123.4, 122.6, 93.7, 93.2, 78.9, 78.7, 68.8, 68.8, 52.9, 51.7, 51.6, 49.8, 27.9, 27.7, 21.6, 15.9, 15.8.

HRMS (ESI)  $m/z$ :  $[M+H]^+$  calcd for  $C_{27}H_{27}ClNO_4S$ , 496.1349; found: 496.1371.

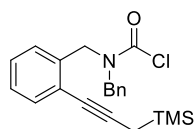

**benzyl(2-(3-(trimethylsilyl)prop-1-yn-1-yl)benzyl)carbamic chloride (1w)**

Compound **1w** was prepared following the general procedure using 2-iodobenzaldehyde (695 mg, 3.0 mmol) and was isolated as a pale yellow oil (655 mg, 59% yield, a mixture of two isomers 1: 1) after silica gel column chromatography (Petroleum/EtOAc=20/1).

$^1H$  NMR (400 MHz,  $CDCl_3$ )  $\delta$  7.36 – 7.10 (m, 9H), 4.75 (s, 1H), 4.68 (s, 1H), 4.58 (s, 1H), 4.46 (s, 1H), 1.59 (s, 1H), 1.53 (s, 1H), -0.00 (s, 4.5H), -0.02 (s, 4.5H).

$^{13}C$  NMR (100 MHz,  $CDCl_3$ )  $\delta$  152.8, 152.4, 138.3, 138.1, 137.4, 134.5, 134.4, 130.7, 130.3, 130.0, 129.9, 129.8, 129.7, 129.55, 129.49, 129.1, 127.9, 126.5, 125.8, 96.9, 96.3, 55.1, 53.95, 53.86, 52.1, 10.2, 10.1, 0.00, -0.02.

HRMS (ESI) m/z: [M+H]<sup>+</sup> calcd for C<sub>21</sub>H<sub>25</sub>ClNOSi, 370.1394; found: 370.1399.

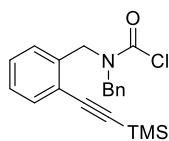

### benzyl(2-((trimethylsilyl)ethynyl)benzyl)carbamate (**1x**)

Compound **1x** was prepared following the general procedure using 2-iodobenzaldehyde (695 mg, 3.0 mmol) and was isolated as a pale yellow oil (480 mg, 45% yield, a mixture of two isomers **1**: **1**) after silica gel column chromatography (Petroleum/EtOAc=20/1).

<sup>1</sup>H NMR (400 MHz, CDCl<sub>3</sub>) δ 7.30 (t, *J* = 8.2 Hz, 1H), 7.25 – 6.95 (m, 8H), 4.69 (s, 1H), 4.62 (s, 1H), 4.46 (s, 1H), 4.31 (s, 1H), 0.00 (s, 4.5H), -0.05 (s, 4.5H).

<sup>13</sup>C NMR (100 MHz, CDCl<sub>3</sub>) δ 150.8, 150.7, 137.4, 137.2, 135.5, 133.1, 133.0, 129.3, 129.0, 128.9, 128.7, 128.4, 128.3, 128.1, 128.2, 127.8, 127.2, 126.6, 123.0, 122.4, 102.2, 101.9, 100.7, 100.1, 53.4, 52.0, 51.8, 50.2, 0.0, -0.1.

HRMS (ESI) m/z: [M+H]<sup>+</sup> calcd for C<sub>20</sub>H<sub>23</sub>ClNOSi, 356.1237; found: 356.1244.

### 2.2 Procedure for the synthesis of substrate **1y**

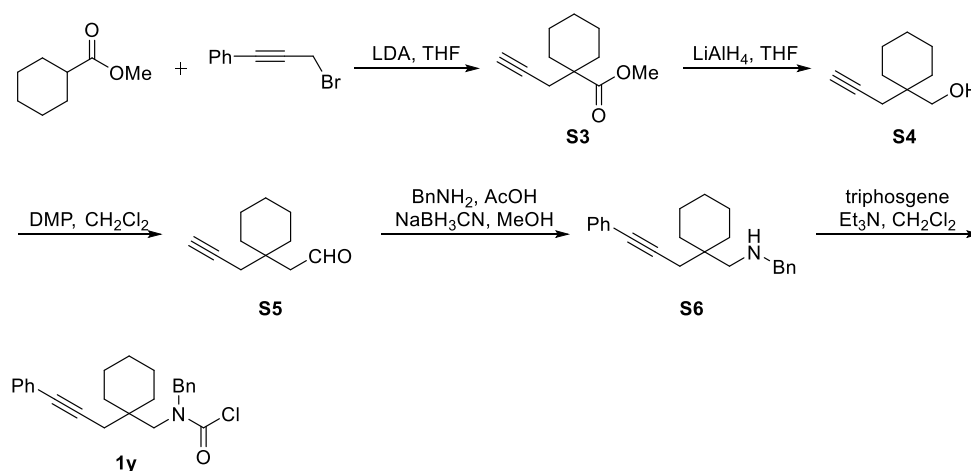

To a solution of methyl cyclohexanecarboxylate (1 equiv) in THF was added LDA (1.5 equiv) dropwise at -78°C, and the resulting mixture was stirred at -78°C. After 30 mins' stirring, (3-bromoprop-1-yn-1-yl)benzene (1.1 equiv) was added. The temperature was warmed to room temperature, and the resulting mixture was stirred at room temperature for 3 h. The reaction mixture was quenched with H<sub>2</sub>O, extracted with EtOAc three times, and washed with brine. The organic layers were dried over Na<sub>2</sub>SO<sub>4</sub> and concentrated under reduced pressure after filtration. The crude mixture was purified by silica-gel column chromatography.

To a cooled (0 °C) solution of **S3** (1.0 equiv.) in THF was added LiAlH<sub>4</sub> (1.1 equiv.) portionwise, and the reaction mixture was kept stirring for 30 min at 0 °C. The reaction mixture was carefully quenched with saturated aqueous NaHSO<sub>4</sub> solution at 0 °C, and then extracted with EtOAc. The organic extracts were dried over MgSO<sub>4</sub>, filtered and evaporated under reduced pressure to afford the crude product. The crude product was purified by column chromatography on silica gel.

To a solution of **S4** (1 equiv) in CH<sub>2</sub>Cl<sub>2</sub> was added DMP (1.2 equiv) dropwise at room temperature, and the resulting mixture was stirred for 1 h. The reaction mixture was quenched with Saq. Na<sub>2</sub>S<sub>2</sub>O<sub>3</sub> and Saq. NaHCO<sub>3</sub>, extracted with EtOAc three times, and washed with brine. The organic layers were dried over Na<sub>2</sub>SO<sub>4</sub> and concentrated under reduced pressure after filtration. The crude mixture was purified by silica-gel column chromatography.

Compound **S5** (1.1 equiv), AcOH (1.1 equiv), and NaBH<sub>3</sub>CN (1.1 equiv) were added to stirred mixture of benzylamine (1 equiv) in MeOH (0.1 M). The mixture was stirred at room temperature for 12 h. The solution was then made alkaline with NaOH (1 N) and extracted with EtOAc. The organic layers were collected, dried over MgSO<sub>4</sub>, and evaporated to dryness under reduced pressure to afford compound **S6**.

To a solution of **S6** (1 equiv) in CH<sub>2</sub>Cl<sub>2</sub> was added Et<sub>3</sub>N (2 equiv), followed by triphosgene (0.5 equiv). The resulting mixture was stirred at room temperature for 30 min. The reaction mixture was quenched with H<sub>2</sub>O, extracted with CH<sub>2</sub>Cl<sub>2</sub> three times, and washed with brine. The organic layers were dried over Na<sub>2</sub>SO<sub>4</sub> and concentrated under reduced pressure after filtration. The crude mixture was purified by silica-gel column chromatography. Compound **1y** was isolated as a yellow oil (400 mg, 35% yield) after silica gel column chromatography (Petroleum/EtOAc=20/1).

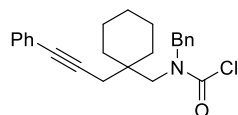

### benzyl((1-(3-phenylprop-2-yn-1-yl)cyclohexyl)methyl)carbamic chloride (**1y**)

<sup>1</sup>H NMR (400 MHz, CDCl<sub>3</sub>) δ 7.31 – 7.19 (m, 10H), 4.86 (s, 2H), 3.38 (s, 2H), 2.49 (s, 2H), 1.57 – 1.45 (m, 6H), 1.42 – 1.36 (m, 4H).

<sup>13</sup>C NMR (100 MHz, CDCl<sub>3</sub>) δ 150.3, 135.0, 130.6, 127.8, 127.2, 126.81, 126.76, 125.8, 122.5, 85.9, 82.9, 55.5, 55.0, 38.9, 32.8, 24.8, 20.4.

HRMS (ESI) m/z: [M+H]<sup>+</sup> calcd for C<sub>24</sub>H<sub>27</sub>ClNO, 380.1781; found: 380.1789.

### 2.3 General procedure for synthesis of substrate **3**



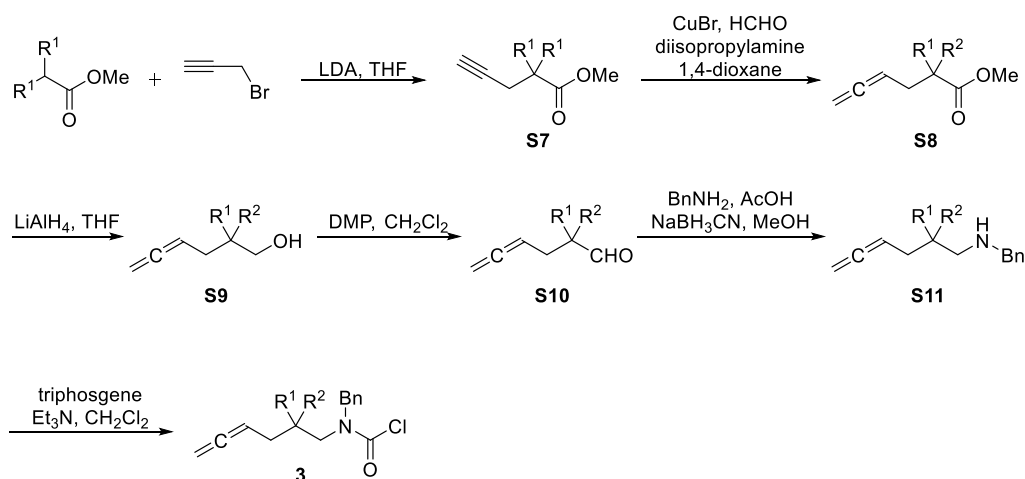

To a solution of carboxymethyl ester (1 equiv) in THF was added LDA (1.5 equiv) dropwise at  $-78^\circ\text{C}$ , and the resulting mixture was stirred at  $-78^\circ\text{C}$ . After 30 mins' stirring, 3-bromoprop-1-yne (1.1 equiv) was added. The temperature was warmed to room temperature, and the resulting mixture was stirred at room temperature for 3 h. The reaction mixture was quenched with  $\text{H}_2\text{O}$ , extracted with EtOAc three times, and washed with brine. The organic layers were dried over  $\text{Na}_2\text{SO}_4$  and concentrated under reduced pressure after filtration. The crude mixture was purified by silica-gel column chromatography.

To a mixture of HCHO (2.0 equiv.) and CuBr (0.5 equiv.) was added 1,4-dioxane, diisopropylamine (2.0 equiv.) and **S7** (1.0 equiv.) under  $\text{N}_2$  atmosphere. After completion of the reaction (monitored by TLC), the reaction was quenched with 1 M HCl solution and then extracted with EtOAc. The organic layers were dried over  $\text{Na}_2\text{SO}_4$ , filtered and evaporated under reduced pressure. The crude product was purified by column chromatography on silica gel.

To a cooled ( $0^\circ\text{C}$ ) solution of **S8** (1.0 equiv.) in THF was added  $\text{LiAlH}_4$  (1.1 equiv.) portionwise, and the reaction mixture was kept stirring for 30 min at  $0^\circ\text{C}$ . The reaction mixture was carefully quenched with saturated aqueous  $\text{NaHSO}_4$  solution at  $0^\circ\text{C}$ , and then extracted with EtOAc. The organic extracts were dried over  $\text{MgSO}_4$ , filtered and evaporated under reduced pressure to afford the crude product. The crude product was purified by column chromatography on silica gel.

To a solution of **S9** (1 equiv) in  $\text{CH}_2\text{Cl}_2$  was added DMP (1.2 equiv) dropwise at room temperature, and the resulting mixture was stirred for 1 h. The reaction mixture was quenched with Saq.  $\text{Na}_2\text{S}_2\text{O}_3$  and Saq.  $\text{NaHCO}_3$ , extracted with EtOAc three times, and washed with brine. The organic layers were dried over  $\text{Na}_2\text{SO}_4$  and concentrated under reduced pressure after filtration. The crude mixture was purified by silica-gel column chromatography.

Compound **S10** (1.1 equiv), AcOH (1.1 equiv), and NaBH<sub>3</sub>CN (1.1 equiv) were added to stirred mixture of benzylamine (1 equiv) in MeOH (0.1 M). The mixture was stirred at room temperature for 12 h. The solution was then made alkaline with NaOH (1 N) and extracted with EtOAc. The organic layers were collected, dried over MgSO<sub>4</sub>, and evaporated to dryness under reduced pressure to afford compound **S11**.

To a solution of **S11** (1 equiv) in CH<sub>2</sub>Cl<sub>2</sub> was added Et<sub>3</sub>N (2 equiv), followed by triphosgene (0.5 equiv). The resulting mixture was stirred at room temperature for 30 min. The reaction mixture was quenched with H<sub>2</sub>O, extracted with CH<sub>2</sub>Cl<sub>2</sub> three times, and washed with brine. The organic layers were dried over Na<sub>2</sub>SO<sub>4</sub> and concentrated under reduced pressure after filtration. The crude mixture was purified by silica-gel column chromatography.

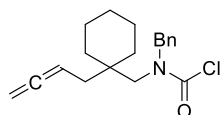

### benzyl((1-(buta-2,3-dien-1-yl)cyclohexyl)methyl)carbamic chloride (**3a**)

Compound **3a** was prepared following the general procedure using methyl cyclohexanecarboxylate (710 mg, 5.0 mmol) and was isolated as a yellow oil (470 mg, 30% yield) after silica gel column chromatography (Petroleum/EtOAc=20/1).

<sup>1</sup>H NMR (400 MHz, CDCl<sub>3</sub>) δ 7.45 – 7.25 (m, 3H), 7.20 (d, *J* = 7.3 Hz, 2H), 5.17 – 4.97 (m, 1H), 4.80 (s, 2H), 4.66 – 4.53 (m, 2H), 3.32 (s, 2H), 2.30 – 2.08 (m, 2H), 1.55 – 1.31 (m, 10H).

<sup>13</sup>C NMR (100 MHz, CDCl<sub>3</sub>) δ 209.8, 151.3, 136.0, 128.9, 127.8, 126.5, 85.2, 74.1, 57.0, 56.3, 39.9, 33.7, 25.8, 21.4.

HRMS (ESI) *m/z*: [M+H]<sup>+</sup> calcd for C<sub>19</sub>H<sub>25</sub>ClNO, 318.1625; found: 318.1635.

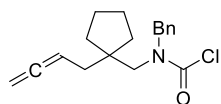

### benzyl((1-(buta-2,3-dien-1-yl)cyclopentyl)methyl)carbamic chloride (**3b**)

Compound **3b** was prepared following the general procedure using methyl cyclopentanecarboxylate (640 mg, 5.0 mmol) and was isolated as a yellow oil (350 mg, 23% yield) after silica gel column chromatography (Petroleum/EtOAc=20/1).

<sup>1</sup>H NMR (400 MHz, CDCl<sub>3</sub>) δ 7.34 (dq, *J* = 14.2, 7.1 Hz, 3H), 7.21 (d, *J* = 7.3 Hz, 2H), 5.10 (dt, *J* = 13.9, 6.9 Hz, 1H), 4.81 (s, 2H), 4.67 – 4.53 (m, 2H), 3.41 (s, 2H), 2.13 (dt, *J* = 7.7, 2.7 Hz, 2H), 1.73 – 1.46 (m, 8H).

$^{13}\text{C}$  NMR (100 MHz,  $\text{CDCl}_3$ )  $\delta$  209.8, 151.4, 135.9, 128.9, 127.8, 126.5, 86.4, 74.3, 55.5, 55.1, 48.8, 36.3, 35.6, 23.9.

HRMS (ESI)  $m/z$ :  $[\text{M}+\text{H}]^+$  calcd for  $\text{C}_{18}\text{H}_{23}\text{ClNO}$ , 304.1468; found: 304.1456.

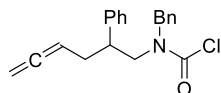

### benzyl(2-phenylhexa-4,5-dien-1-yl)carbamic chloride (**3c**)

Compound **3c** was prepared following the general procedure using methyl benzoate (680 mg, 5.0 mmol) and was isolated as a yellow oil (350 mg, 22% yield) after silica gel column chromatography (Petroleum/EtOAc=20/1).

$^1\text{H}$  NMR (400 MHz,  $\text{CDCl}_3$ )  $\delta$  7.21 – 7.11 (m, 6H), 7.05 (d,  $J$  = 8.0 Hz, 2H), 6.96 (d,  $J$  = 6.5 Hz, 2H), 4.87 – 4.72 (m, 1H), 4.58 – 4.37 (m, 3H), 3.81 – 3.59 (m, 2H), 3.49 (d,  $J$  = 15.0 Hz, 1H), 3.23 – 2.96 (m, 2H), 2.30 – 2.11 (m, 2H).

$^{13}\text{C}$  NMR (100 MHz,  $\text{CDCl}_3$ )  $\delta$  209.24, 209.18, 150.4, 149.8, 141.48, 141.46, 135.7, 135.5, 129.0, 128.94, 128.87, 128.12, 128.08, 127.5, 127.3, 127.1, 87.4, 87.3, 75.4, 75.3, 55.4, 54.9, 54.6, 52.9, 45.1, 43.7, 32.31, 32.29.

HRMS (ESI)  $m/z$ :  $[\text{M}+\text{H}]^+$  calcd for  $\text{C}_{20}\text{H}_{21}\text{ClNO}$ , 326.1312; found: 326.1322.

### 3. Typical Procedure for Chlorocarbamylation

To a solution of **1** (0.2 mmol, 1.0 equiv) in dichloromethane (2 mL) was added  $\text{BCl}_3$  (40  $\mu\text{L}$ , 1M in  $\text{CH}_2\text{Cl}_2$ , 20%) at room temperature. The resulting mixture was stirred at room temperature for 30 min as monitored by TLC. Upon completion, the reaction mixture was quenched with water (2 mL) and extracted with  $\text{CH}_2\text{Cl}_2$  (5 mL  $\times$  3). The combined organic layers were dried over anhydrous  $\text{Na}_2\text{SO}_4$ , filtered and concentrated. The residue was purified by a short column chromatography on silica gel to afford chlorocarbamylation products.

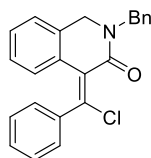

### (*Z*)-2-benzyl-4-(chloro(phenyl)methylene)-1,4-dihydroisoquinolin-3(2H)-one (**2a**)

Compound **2a** was prepared according to the general procedure and was isolated as a yellow oil

(65 mg, 90% yield) after silica gel column chromatography (Petroleum/EtOAc=10/1).

$^1\text{H}$  NMR (400 MHz,  $\text{CDCl}_3$ )  $\delta$  8.03 (d,  $J = 7.5$  Hz, 1H), 7.50 – 7.42 (m, 2H), 7.42 – 7.34 (m, 4H), 7.34 – 7.24 (m, 4H), 7.22 – 7.17 (m, 2H), 7.13 (d,  $J = 7.3$  Hz, 1H), 4.64 (s, 2H), 4.35 (s, 2H).

$^{13}\text{C}$  NMR (100 MHz,  $\text{CDCl}_3$ )  $\delta$  165.0, 139.5, 139.3, 136.8, 134.0, 132.5, 129.6, 129.2, 128.8, 128.73, 128.66, 128.2, 128.0, 127.9, 127.7, 127.0, 125.0, 50.5, 50.1.

HRMS (ESI)  $m/z$ :  $[\text{M}+\text{H}]^+$  calcd for  $\text{C}_{23}\text{H}_{19}\text{ClNO}$ , 360.1155; found: 360.1159.

#### Procedures of Synthesis of **2a** in 2.0 mmol

To a solution of **1a** (720 mg, 2.0 mmol) in dichloromethane (20 mL) was added  $\text{BCl}_3$  (400  $\mu\text{L}$ , 1M in  $\text{CH}_2\text{Cl}_2$ , 20%) at room temperature. The resulting mixture was stirred at room temperature for 30 min as monitored by TLC. Upon completion, the reaction mixture was quenched with water (20 mL) and extracted with  $\text{CH}_2\text{Cl}_2$  (30 mL  $\times$  3). The combined organic layers were dried over anhydrous  $\text{Na}_2\text{SO}_4$ , filtered and concentrated. The residue was purified by silica gel column chromatography to afford chlorocarbamoylation product **2a** as a yellow oil (620 mg, 86% yield).

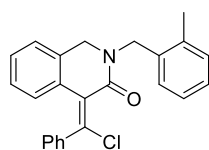

#### (Z)-4-(chloro(phenyl)methylene)-2-(2-methylbenzyl)-1,4-dihydroisoquinolin-3(2H)-one (**2b**)

Compound **2b** was prepared according to the general procedure and was isolated as a yellow oil (66 mg, 88% yield) after silica gel column chromatography (Petroleum/EtOAc=10/1).

$^1\text{H}$  NMR (400 MHz,  $\text{CDCl}_3$ )  $\delta$  8.04 (d,  $J = 7.8$  Hz, 1H), 7.55 – 7.45 (m, 2H), 7.44 – 7.33 (m, 4H), 7.27 (t,  $J = 7.5$  Hz, 1H), 7.21 – 6.99 (m, 5H), 4.66 (s, 2H), 4.29 (s, 2H), 2.16 (s, 3H).

$^{13}\text{C}$  NMR (100 MHz,  $\text{CDCl}_3$ )  $\delta$  164.8, 139.5, 139.3, 136.8, 134.2, 134.1, 132.6, 130.7, 129.6, 129.2, 128.74, 128.71, 128.6, 128.1, 128.0, 127.8, 127.0, 126.1, 125.0, 49.4, 48.2, 19.1.

HRMS (ESI)  $m/z$ :  $[\text{M}+\text{H}]^+$  calcd for  $\text{C}_{24}\text{H}_{21}\text{ClNO}$ , 374.1312; found: 374.1329.

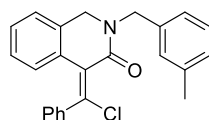

#### (Z)-4-(chloro(phenyl)methylene)-2-(3-methylbenzyl)-1,4-dihydroisoquinolin-3(2H)-one (**2c**)

Compound **2c** was prepared according to the general procedure and was isolated as a yellow oil (65 mg, 87% yield) after silica gel column chromatography (Petroleum/EtOAc=10/1).

$^1\text{H}$  NMR (400 MHz,  $\text{CDCl}_3$ )  $\delta$  7.96 (d,  $J = 7.4$  Hz, 1H), 7.44 – 7.37 (m, 2H), 7.36 – 7.28 (m, 4H),

7.22 (td,  $J = 7.5, 1.1$  Hz, 1H), 7.16 – 7.05 (m, 2H), 7.02 (d,  $J = 7.5$  Hz, 1H), 6.94 (d,  $J = 8.4$  Hz, 2H), 4.54 (s, 2H), 4.28 (s, 2H), 2.25 (s, 3H).

$^{13}\text{C}$  NMR (100 MHz,  $\text{CDCl}_3$ )  $\delta$  163.9, 138.5, 138.2, 137.4, 135.6, 133.0, 131.5, 128.6, 128.2, 127.8, 127.7, 127.6, 127.5, 127.4, 127.0, 126.8, 125.9, 124.2, 123.9, 49.4, 49.0, 20.4.

HRMS (ESI)  $m/z$ :  $[\text{M}+\text{H}]^+$  calcd for  $\text{C}_{24}\text{H}_{21}\text{ClNO}$ , 374.1312; found: 374.1324.

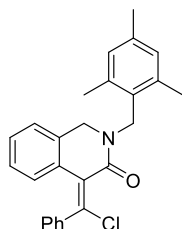

**(Z)-4-(chloro(phenyl)methylene)-2-(2,4,6-trimethylbenzyl)-1,4-dihydroisoquinolin-3(2H)-one (2d)**

Compound **2d** was prepared according to the general procedure and was isolated as a yellow oil (68 mg, 85% yield) after silica gel column chromatography (Petroleum/EtOAc=10/1).

$^1\text{H}$  NMR (400 MHz,  $\text{CDCl}_3$ )  $\delta$  7.93 (d,  $J = 7.8$  Hz, 1H), 7.48 – 7.39 (m, 2H), 7.36 – 7.30 (m, 3H), 7.27 (t,  $J = 7.7$  Hz, 1H), 7.17 – 7.10 (m, 1H), 6.89 (d,  $J = 7.5$  Hz, 1H), 6.78 (s, 2H), 4.60 (s, 2H), 3.95 (s, 2H), 2.20 (s, 3H), 2.09 (s, 6H).

$^{13}\text{C}$  NMR (100 MHz,  $\text{CDCl}_3$ )  $\delta$  163.7, 138.4, 138.1, 137.1, 136.6, 133.4, 131.6, 128.8, 128.3, 128.1, 127.68, 127.66, 127.5, 126.9, 126.8, 125.9, 123.8, 45.9, 42.0, 19.9, 18.9.

HRMS (ESI)  $m/z$ :  $[\text{M}+\text{H}]^+$  calcd for  $\text{C}_{26}\text{H}_{25}\text{ClNO}$ , 402.1625; found: 402.1633.

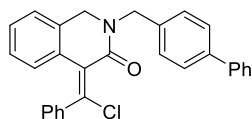

**(Z)-2-([1,1'-biphenyl]-4-ylmethyl)-4-(chloro(phenyl)methylene)-1,4-dihydroisoquinolin-3(2H)-one (2e)**

Compound **2e** was prepared according to the general procedure and was isolated as a yellow oil (75 mg, 86% yield) after silica gel column chromatography (Petroleum/EtOAc=10/1).

$^1\text{H}$  NMR (400 MHz,  $\text{CDCl}_3$ )  $\delta$  8.04 (d,  $J = 7.4$  Hz, 1H), 7.63 – 7.51 (m, 4H), 7.50 – 7.26 (m, 12H), 7.18 (d,  $J = 7.4$  Hz, 1H), 4.69 (s, 2H), 4.41 (s, 2H).

$^{13}\text{C}$  NMR (100 MHz,  $\text{CDCl}_3$ )  $\delta$  165.0, 140.6, 139.5, 139.3, 135.8, 134.0, 132.5, 129.6, 129.3, 128.82, 128.76, 128.7, 128.6, 128.0, 127.9, 127.44, 127.41, 127.1, 127.0, 125.0, 50.18, 50.17.

HRMS (ESI)  $m/z$ :  $[\text{M}+\text{H}]^+$  calcd for  $\text{C}_{29}\text{H}_{23}\text{ClNO}$ , 436.1468; found: 436.1453.

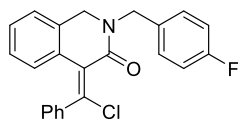

**(Z)-4-(chloro(phenyl)methylene)-2-(4-fluorobenzyl)-1,4-dihydroisoquinolin-3(2H)-one (2f)**

Compound **2f** was prepared according to the general procedure and was isolated as a yellow oil (60 mg, 79% yield) after silica gel column chromatography (Petroleum/EtOAc=10/1).

$^1\text{H}$  NMR (400 MHz,  $\text{CDCl}_3$ )  $\delta$  8.03 (d,  $J = 7.6$  Hz, 1H), 7.48 – 7.35 (m, 6H), 7.29 (td,  $J = 7.5, 1.0$  Hz, 1H), 7.21 – 7.12 (m, 3H), 6.99 (t,  $J = 8.7$  Hz, 2H), 4.60 (s, 2H), 4.36 (s, 2H).

$^{13}\text{C}$  NMR (100 MHz,  $\text{CDCl}_3$ )  $\delta$  165.0, 162.3 (d,  $J = 246.2$  Hz), 139.5, 139.4, 133.9, 132.61, 132.58, 132.4, 129.8 (d,  $J = 8.0$  Hz), 129.5, 129.3, 128.71, 128.68, 128.02, 127.97, 127.1, 124.9, 115.6 (d,  $J = 21.6$  Hz), 50.1, 49.8.

HRMS (ESI)  $m/z$ :  $[\text{M}+\text{H}]^+$  calcd for  $\text{C}_{23}\text{H}_{18}\text{ClFNO}$ , 378.1061; found: 378.1059.

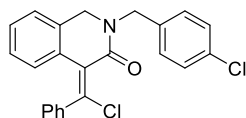

**(Z)-4-(chloro(phenyl)methylene)-2-(4-chlorobenzyl)-1,4-dihydroisoquinolin-3(2H)-one (2g)**

Compound **2g** was prepared according to the general procedure and was isolated as a yellow oil (70 mg, 89% yield) after silica gel column chromatography (Petroleum/EtOAc=10/1).

$^1\text{H}$  NMR (400 MHz,  $\text{CDCl}_3$ )  $\delta$  8.04 (d,  $J = 7.7$  Hz, 1H), 7.50 – 7.35 (m, 6H), 7.33 – 7.26 (m, 3H), 7.14 (t,  $J = 8.4$  Hz, 3H), 4.60 (s, 2H), 4.36 (s, 2H).

$^{13}\text{C}$  NMR (100 MHz,  $\text{CDCl}_3$ )  $\delta$  165.0, 139.54, 139.46, 135.3, 133.8, 133.6, 132.4, 129.5, 129.4, 129.3, 128.9, 128.7, 128.02, 128.00, 127.1, 124.9, 50.1, 49.8.

HRMS (ESI)  $m/z$ :  $[\text{M}+\text{H}]^+$  calcd for  $\text{C}_{23}\text{H}_{18}\text{Cl}_2\text{NO}$ , 394.0765; found: 394.0782.

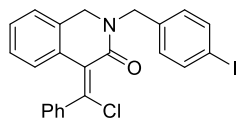

**(Z)-4-(chloro(phenyl)methylene)-2-(4-iodobenzyl)-1,4-dihydroisoquinolin-3(2H)-one (2h)**

Compound **2h** was prepared according to the general procedure and was isolated as a yellow oil (84 mg, 86% yield) after silica gel column chromatography (Petroleum/EtOAc=10/1).

$^1\text{H}$  NMR (400 MHz,  $\text{CDCl}_3$ )  $\delta$  7.64 (d,  $J = 8.3$  Hz, 2H), 7.30 – 7.22 (m, 5H), 7.13 – 6.99 (m, 4H), 6.93 – 6.86 (m, 1H), 6.66 (d,  $J = 7.8$  Hz, 1H), 4.76 (s, 2H), 4.34 (s, 2H).

$^{13}\text{C}$  NMR (100 MHz,  $\text{CDCl}_3$ )  $\delta$  164.7, 138.6, 137.9, 137.0, 136.4, 133.3, 132.8, 129.9, 129.5, 129.2, 128.8, 128.4, 128.1, 127.4, 127.0, 125.0, 93.1, 49.9, 49.8.

HRMS (ESI)  $m/z$ :  $[M+H]^+$  calcd for  $C_{23}H_{18}ClINO$ , 486.0122; found: 486.0126.

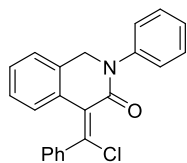

**(Z)-4-(chloro(phenyl)methylene)-2-phenyl-1,4-dihydroisoquinolin-3(2H)-one (2i)**

Compound **2i** was prepared according to the general procedure and was isolated as a yellow oil (62 mg, 90% yield) after silica gel column chromatography (Petroleum/EtOAc=10/1).

$^1H$  NMR (400 MHz,  $CDCl_3$ )  $\delta$  8.07 (d,  $J = 7.3$  Hz, 1H), 7.55 – 7.48 (m, 2H), 7.44 (td,  $J = 7.7, 1.2$  Hz, 1H), 7.41 – 7.28 (m, 6H), 7.29 – 7.22 (m, 3H), 7.22 – 7.15 (m, 1H), 4.86 (s, 2H).

$^{13}C$  NMR (100 MHz,  $CDCl_3$ )  $\delta$  164.6, 141.9, 140.1, 139.1, 134.3, 132.7, 130.0, 129.3, 129.0, 128.9, 128.8, 128.1, 127.3, 126.4, 125.0, 53.4.

HRMS (ESI)  $m/z$ :  $[M+H]^+$  calcd for  $C_{22}H_{17}ClINO$ , 346.0999; found: 346.0982.

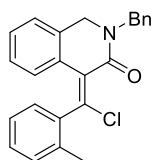

**(Z)-2-benzyl-4-(chloro(o-tolyl)methylene)-1,4-dihydroisoquinolin-3(2H)-one (2j)**

Compound **2j** was prepared according to the general procedure and was isolated as a yellow oil (62 mg, 83% yield) after silica gel column chromatography (Petroleum/EtOAc=10/1).

$^1H$  NMR (400 MHz,  $CDCl_3$ )  $\delta$  7.35 – 7.23 (m, 6H), 7.21 (dd,  $J = 7.4, 1.5$  Hz, 1H), 7.16 (t,  $J = 7.0$  Hz, 1H), 7.12 – 7.07 (m, 1H), 7.07 – 6.98 (m, 2H), 6.90 – 6.82 (m, 1H), 6.57 (d,  $J = 7.8$  Hz, 1H), 5.01 – 4.72 (m, 2H), 4.32 (dd,  $J = 34.7, 15.4$  Hz, 2H), 2.09 (s, 3H).

$^{13}C$  NMR (100 MHz,  $CDCl_3$ )  $\delta$  164.6, 138.1, 136.6, 136.1, 135.3, 133.0, 132.7, 130.5, 129.8, 129.6, 129.1, 128.8, 127.9, 127.62, 127.56, 127.3, 127.0, 126.2, 124.8, 50.1, 49.6, 19.1.

HRMS (ESI)  $m/z$ :  $[M+H]^+$  calcd for  $C_{24}H_{21}ClINO$ , 374.1312; found: 374.1328.

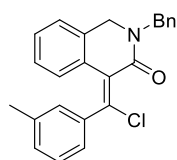

**(Z)-2-benzyl-4-(chloro(m-tolyl)methylene)-1,4-dihydroisoquinolin-3(2H)-one (2k)**

Compound **2k** was prepared according to the general procedure and was isolated as a yellow oil (60 mg, 80% yield) after silica gel column chromatography (Petroleum/EtOAc=10/1).

$^1H$  NMR (400 MHz,  $CDCl_3$ )  $\delta$  8.03 (d,  $J = 7.7$  Hz, 1H), 7.42 – 7.35 (m, 1H), 7.34 – 7.19 (m, 10H),

7.15 (d,  $J = 7.5$  Hz, 1H), 4.65 (s, 2H), 4.35 (s, 2H), 2.40 (s, 3H).

$^{13}\text{C}$  NMR (100 MHz,  $\text{CDCl}_3$ )  $\delta$  165.1, 139.58, 139.55, 137.7, 136.9, 134.0, 132.5, 130.1, 129.4, 129.2, 128.7, 128.6, 128.1, 128.0, 127.9, 127.7, 127.0, 125.8, 124.9, 50.4, 50.1, 21.5.

HRMS (ESI)  $m/z$ :  $[\text{M}+\text{H}]^+$  calcd for  $\text{C}_{24}\text{H}_{21}\text{ClNO}$ , 374.1312; found: 374.1314.

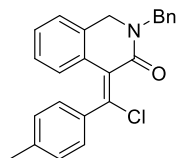

**(Z)-2-benzyl-4-(chloro(p-tolyl)methylene)-1,4-dihydroisoquinolin-3(2H)-one (2l)**

Compound **2l** was prepared according to the general procedure and was isolated as a yellow oil (68 mg, 91% yield) after silica gel column chromatography (Petroleum/EtOAc=10/1).

$^1\text{H}$  NMR (400 MHz,  $\text{CDCl}_3$ )  $\delta$  7.34 – 7.20 (m, 5H), 7.13 (d,  $J = 8.2$  Hz, 2H), 7.10 – 6.99 (m, 4H), 6.93 – 6.85 (m, 1H), 6.70 (d,  $J = 7.8$  Hz, 1H), 4.82 (s, 2H), 4.33 (s, 2H), 2.30 (s, 3H).

$^{13}\text{C}$  NMR (100 MHz,  $\text{CDCl}_3$ )  $\delta$  164.8, 139.3, 137.0, 136.7, 135.8, 133.6, 133.1, 129.5, 129.1, 128.79, 128.76, 127.99, 127.95, 127.6, 127.3, 126.9, 125.0, 50.2, 49.8, 21.4.

HRMS (ESI)  $m/z$ :  $[\text{M}+\text{H}]^+$  calcd for  $\text{C}_{24}\text{H}_{21}\text{ClNO}$ , 374.1312; found: 374.1326.

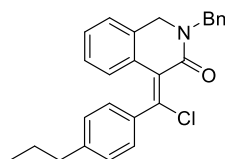

**(Z)-2-benzyl-4-(chloro(4-propylphenyl)methylene)-1,4-dihydroisoquinolin-3(2H)-one (2m)**

Compound **2m** was prepared according to the general procedure and was isolated as a yellow oil (71 mg, 88% yield) after silica gel column chromatography (Petroleum/EtOAc=10/1).

$^1\text{H}$  NMR (400 MHz,  $\text{CDCl}_3$ )  $\delta$  7.36 – 7.21 (m, 5H), 7.15 (d,  $J = 8.2$  Hz, 2H), 7.11 – 7.00 (m, 4H), 6.92 – 6.84 (m, 1H), 6.68 (d,  $J = 7.8$  Hz, 1H), 4.83 (s, 2H), 4.33 (s, 2H), 2.60 – 2.49 (m, 2H), 1.65 – 1.57 (m, 2H), 0.91 (t,  $J = 7.3$  Hz, 3H).

$^{13}\text{C}$  NMR (100 MHz,  $\text{CDCl}_3$ )  $\delta$  164.8, 144.0, 137.2, 136.7, 136.0, 133.5, 133.1, 129.5, 128.81, 128.77, 128.4, 127.9, 127.6, 127.2, 126.8, 124.9, 50.2, 49.8, 37.7, 24.2, 13.7.

HRMS (ESI)  $m/z$ :  $[\text{M}+\text{H}]^+$  calcd for  $\text{C}_{26}\text{H}_{25}\text{ClNO}$ , 402.1625; found: 402.1641.

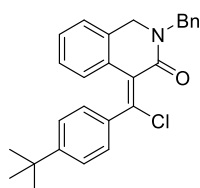



**(Z)-2-benzyl-4-((4-(tert-butyl)phenyl)chloromethylene)-1,4-dihydroisoquinolin-3(2H)-one**

**(2n)**

Compound **2n** was prepared according to the general procedure and was isolated as a yellow oil (65 mg, 78% yield) after silica gel column chromatography (Petroleum/EtOAc=10/1).

<sup>1</sup>H NMR (400 MHz, CDCl<sub>3</sub>) δ 7.34 – 7.26 (m, 5H), 7.24 (t, *J* = 2.0 Hz, 2H), 7.19 – 7.15 (m, 2H), 7.10 – 7.02 (m, 2H), 6.92 – 6.85 (m, 1H), 6.69 (d, *J* = 7.8 Hz, 1H), 4.83 (s, 2H), 4.34 (s, 2H), 1.28 (s, 9H).

<sup>13</sup>C NMR (100 MHz, CDCl<sub>3</sub>) δ 164.9, 152.5, 137.1, 136.7, 135.7, 133.5, 133.1, 129.3, 128.82, 128.78, 128.0, 127.6, 127.2, 126.9, 125.2, 124.9, 50.2, 49.8, 34.7, 31.2.

HRMS (ESI) *m/z*: [M+H]<sup>+</sup> calcd for C<sub>27</sub>H<sub>27</sub>ClNO, 416.1781; found: 416.1778.

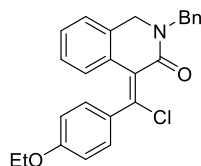

**(Z)-2-benzyl-4-(chloro(4-ethoxyphenyl)methylene)-1,4-dihydroisoquinolin-3(2H)-one (2o)**

Compound **2o** was prepared according to the general procedure and was isolated as a yellow oil (74 mg, 92% yield) after silica gel column chromatography (Petroleum/EtOAc=10/1).

<sup>1</sup>H NMR (400 MHz, CDCl<sub>3</sub>) δ 8.01 (d, *J* = 7.5 Hz, 1H), 7.43 – 7.35 (m, 3H), 7.34 – 7.22 (m, 6H), 7.14 (d, *J* = 7.4 Hz, 1H), 6.93 – 6.81 (m, 2H), 4.66 (s, 2H), 4.36 (s, 2H), 4.07 (q, *J* = 7.0 Hz, 2H), 1.43 (t, *J* = 7.0 Hz, 3H).

<sup>13</sup>C NMR (100 MHz, CDCl<sub>3</sub>) δ 165.3, 159.7, 139.5, 136.8, 134.0, 132.9, 131.4, 130.4, 128.8, 128.7, 128.2, 127.69, 127.66, 126.9, 124.8, 113.8, 63.5, 50.5, 50.1, 14.8.

HRMS (ESI) *m/z*: [M+H]<sup>+</sup> calcd for C<sub>25</sub>H<sub>23</sub>ClNO<sub>2</sub>, 404.1417; found: 404.1412.

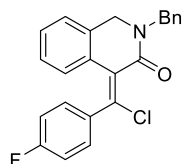

**(Z)-2-benzyl-4-(chloro(4-fluorophenyl)methylene)-1,4-dihydroisoquinolin-3(2H)-one (2p)**

Compound **2p** was prepared according to the general procedure and was isolated as a white solid (68 mg, 90% yield) after silica gel column chromatography (Petroleum/EtOAc=10/1).

<sup>1</sup>H NMR (400 MHz, CDCl<sub>3</sub>) δ 8.01 (d, *J* = 7.8 Hz, 1H), 7.47 – 7.35 (m, 3H), 7.34 – 7.26 (m, 4H),

7.23 – 7.12 (m, 3H), 7.11 – 7.02 (m, 2H), 4.65 (s, 2H), 4.37 (s, 2H).

$^{13}\text{C}$  NMR (100 MHz,  $\text{CDCl}_3$ )  $\delta$  164.8, 163.0 (d,  $J = 249.5$  Hz), 138.1, 136.6, 135.5 (d,  $J = 3.5$  Hz), 133.9, 132.3, 130.8 (d,  $J = 8.5$  Hz), 129.8, 128.7, 128.6, 128.1, 128.0, 127.0, 124.9, 115.1 (d,  $J = 21.9$  Hz), 50.5, 50.1.

$^{19}\text{F}$  NMR (377 MHz,  $\text{CDCl}_3$ )  $\delta$  -111.45.

HRMS (ESI)  $m/z$ :  $[\text{M}+\text{H}]^+$  calcd for  $\text{C}_{23}\text{H}_{18}\text{ClFNO}$ , 378.1061; found: 378.1077.

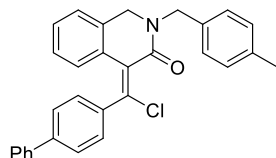

**(Z)-4-([1,1'-biphenyl]-4-ylchloromethylene)-2-(4-methylbenzyl)-1,4-dihydroisoquinolin-3(2H)-one (2q)**

Compound **2q** was prepared according to the general procedure and was isolated as a yellow oil (93 mg, 93% yield) after silica gel column chromatography (Petroleum/EtOAc=10/1).

$^1\text{H}$  NMR (400 MHz,  $\text{CDCl}_3$ )  $\delta$  7.59 – 7.54 (m, 2H), 7.48 (d,  $J = 8.4$  Hz, 2H), 7.45 – 7.40 (m, 2H), 7.39 – 7.29 (m, 3H), 7.22 – 7.02 (m, 6H), 6.95 – 6.86 (m, 1H), 6.75 (d,  $J = 7.9$  Hz, 1H), 4.80 (s, 2H), 4.34 (s, 2H), 2.33 (s, 3H).

$^{13}\text{C}$  NMR (100 MHz,  $\text{CDCl}_3$ )  $\delta$  164.6, 141.8, 140.0, 137.6, 137.3, 136.4, 133.7, 133.6, 132.9, 130.1, 129.5, 128.9, 128.8, 128.4, 128.0, 127.8, 127.4, 127.05, 127.02, 126.9, 125.1, 50.0, 49.7, 21.2.

HRMS (ESI)  $m/z$ :  $[\text{M}+\text{H}]^+$  calcd for  $\text{C}_{30}\text{H}_{25}\text{ClNO}$ , 450.1625; found: 450.1630.

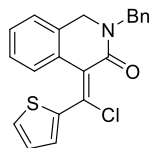

**(Z)-2-benzyl-4-(chloro(thiophen-2-yl)methylene)-1,4-dihydroisoquinolin-3(2H)-one (2r)**

Compound **2r** was prepared according to the general procedure and was isolated as a yellow oil (62 mg, 85% yield) after silica gel column chromatography (Petroleum/EtOAc=10/1).

$^1\text{H}$  NMR (400 MHz,  $\text{CDCl}_3$ )  $\delta$  7.35 – 7.26 (m, 6H), 7.20 – 7.13 (m, 1H), 7.13 – 7.01 (m, 4H), 6.87 (dd,  $J = 5.1, 3.7$  Hz, 1H), 4.81 (s, 2H), 4.32 (s, 2H).

$^{13}\text{C}$  NMR (100 MHz,  $\text{CDCl}_3$ )  $\delta$  164.5, 140.5, 136.5, 134.0, 132.9, 130.4, 129.2, 128.8, 128.7, 128.5, 128.4, 127.9, 127.8, 127.6, 127.1, 126.8, 125.2, 50.2, 49.8.

HRMS (ESI)  $m/z$ :  $[M+H]^+$  calcd for  $C_{21}H_{17}ClNO$ , 366.0719; found: 366.0717.

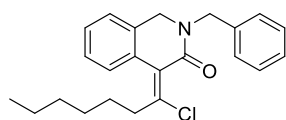

**(Z)-2-benzyl-4-(1-chloroheptylidene)-1,4-dihydroisoquinolin-3(2H)-one (2s)**

Compound **2s** was prepared according to the general procedure and was isolated as a yellow oil (66 mg, 90% yield) after silica gel column chromatography (Petroleum/EtOAc=10/1).

$^1H$  NMR (400 MHz,  $CDCl_3$ )  $\delta$  7.74 (d,  $J = 7.4$  Hz, 1H), 7.39 – 7.33 (m, 1H), 7.32 – 7.26 (m, 3H), 7.22 – 7.19 (m, 3H), 6.91 (d,  $J = 7.1$  Hz, 1H), 4.97 (d,  $J = 14.9$  Hz, 1H), 4.38 (d,  $J = 14.6$  Hz, 1H), 4.29 (d,  $J = 14.9$  Hz, 1H), 3.85 (d,  $J = 14.6$  Hz, 1H), 3.02 – 2.81 (m, 2H), 1.76 – 1.58 (m, 2H), 1.49 – 1.28 (m, 6H), 0.90 (t,  $J = 7.0$  Hz, 3H).

$^{13}C$  NMR (100 MHz,  $CDCl_3$ )  $\delta$  166.6, 138.2, 136.92, 136.85, 136.4, 134.3, 129.3, 129.1, 128.7, 128.21, 128.18, 127.6, 126.4, 49.71, 49.70, 33.7, 31.7, 29.4, 28.6, 22.6, 14.1.

HRMS (ESI)  $m/z$ :  $[M+H]^+$  calcd for  $C_{23}H_{27}ClNO$ , 368.1781; found: 368.1773.

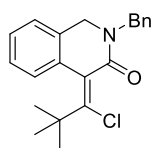

**(Z)-2-benzyl-4-(1-chloro-2,2-dimethylpropylidene)-1,4-dihydroisoquinolin-3(2H)-one (2t)**

Compound **2t** was prepared according to the general procedure and was isolated as a yellow oil (69 mg, 86% yield) after silica gel column chromatography (Petroleum/EtOAc=10/1).

$^1H$  NMR (400 MHz,  $CDCl_3$ )  $\delta$  7.78 (d,  $J = 7.6$  Hz, 1H), 7.41 – 7.25 (m, 4H), 7.25 – 7.14 (m, 3H), 6.97 (d,  $J = 7.3$  Hz, 1H), 5.03 (d,  $J = 15.0$  Hz, 1H), 4.38 (d,  $J = 14.6$  Hz, 1H), 3.92 (d,  $J = 15.0$  Hz, 1H), 3.76 (d,  $J = 14.6$  Hz, 1H), 1.56 (s, 9H).

$^{13}C$  NMR (100 MHz,  $CDCl_3$ )  $\delta$  167.6, 145.3, 137.7, 137.4, 137.0, 130.2, 130.1, 128.70, 128.65, 128.3, 128.2, 127.6, 126.4, 49.8, 47.8, 37.2, 29.8.

HRMS (ESI)  $m/z$ :  $[M+H]^+$  calcd for  $C_{21}H_{23}ClNO$ , 340.1468; found: 340.1476.

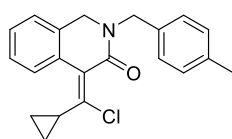

**(Z)-4-(chloro(cyclopropyl)methylene)-2-(4-methylbenzyl)-1,4-dihydroisoquinolin-3(2H)-one (2u)**

Compound **2u** was prepared according to the general procedure and was isolated as a yellow oil (55 mg, 81% yield) after silica gel column chromatography (Petroleum/EtOAc=10/1).

$^1\text{H}$  NMR (400 MHz,  $\text{CDCl}_3$ )  $\delta$  7.53 (d,  $J = 7.8$  Hz, 1H), 7.30 (t,  $J = 7.5$  Hz, 1H), 7.27 – 7.20 (m, 1H), 7.18 (d,  $J = 8.0$  Hz, 2H), 7.12 (d,  $J = 8.0$  Hz, 2H), 7.07 (d,  $J = 7.5$  Hz, 1H), 5.30 – 5.11 (m, 1H), 4.78 – 4.59 (m, 2H), 4.41 (d,  $J = 16.0$  Hz, 1H), 4.30 (d,  $J = 16.0$  Hz, 1H), 3.65 – 3.51 (m, 1H), 3.37 – 3.24 (m, 1H), 2.86 – 2.72 (m, 1H), 2.47 – 2.36 (m, 1H), 2.32 (s, 3H).

$^{13}\text{C}$  NMR (100 MHz,  $\text{CDCl}_3$ )  $\delta$  164.8, 151.6, 137.2, 133.7, 131.4, 130.6, 129.4, 128.1, 127.5, 127.4, 127.2, 125.3, 124.5, 57.4, 49.7, 49.6, 32.0, 31.7, 21.1.

HRMS (ESI)  $m/z$ :  $[\text{M}+\text{H}]^+$  calcd for  $\text{C}_{21}\text{H}_{21}\text{ClNO}$ , 338.1312; found: 338.1326.

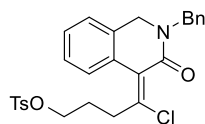

**(Z)-4-(2-benzyl-3-oxo-2,3-dihydroisoquinolin-4(1H)-ylidene)-4-chlorobutyl 4-methylbenzenesulfonate (2v)**

Compound **2v** was prepared according to the general procedure and was isolated as a yellow oil (77 mg, 78% yield) after silica gel column chromatography (Petroleum/EtOAc=10/1).

$^1\text{H}$  NMR (400 MHz,  $\text{CDCl}_3$ )  $\delta$  7.55 (d,  $J = 8.3$  Hz, 2H), 7.33 – 7.27 (m, 3H), 7.22 – 7.13 (m, 6H), 7.05 (td,  $J = 7.7, 1.1$  Hz, 1H), 6.88 (d,  $J = 7.2$  Hz, 1H), 4.91 (d,  $J = 14.8$  Hz, 1H), 4.48 (d,  $J = 14.6$  Hz, 1H), 4.36 (d,  $J = 14.9$  Hz, 1H), 3.92 (d,  $J = 14.7$  Hz, 1H), 3.64 – 3.48 (m, 2H), 2.91 – 2.81 (m, 1H), 2.80 – 2.66 (m, 1H), 2.40 (s, 3H), 2.15 – 1.99 (m, 2H).

$^{13}\text{C}$  NMR (100 MHz,  $\text{CDCl}_3$ )  $\delta$  166.3, 146.9, 145.4, 137.2, 136.7, 133.6, 132.3, 131.6, 129.7, 129.5, 128.7, 128.2, 128.0, 127.72, 127.65, 127.6, 126.5, 50.1, 49.7, 44.7, 32.0, 27.7, 21.7.

HRMS (ESI)  $m/z$ :  $[\text{M}+\text{H}]^+$  calcd for  $\text{C}_{27}\text{H}_{27}\text{ClNO}_4\text{S}$ , 496.1349; found: 496.1350.

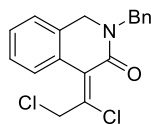

**(Z)-2-benzyl-4-(1,2-dichloroethylidene)-1,4-dihydroisoquinolin-3(2H)-one (2w)**

Compound **2w** was prepared according to the general procedure and was isolated as a yellow oil (47 mg, 71% yield) after silica gel column chromatography (Petroleum/EtOAc=10/1).

$^1\text{H}$  NMR (400 MHz,  $\text{CDCl}_3$ )  $\delta$  7.35 – 7.32 (m, 2H), 7.32 – 7.29 (m, 1H), 7.29 – 7.28 (m, 1H), 7.26 – 7.24 (m, 2H), 7.24 – 7.21 (m, 2H), 6.95 (d,  $J = 7.4$  Hz, 1H), 4.73 (s, 2H), 4.70 (s, 2H), 4.17 (s,

2H).

$^{13}\text{C}$  NMR (100 MHz,  $\text{CDCl}_3$ )  $\delta$  165.4, 136.9, 136.5, 135.8, 134.7, 134.4, 129.5, 129.4, 128.7, 128.3, 128.2, 127.6, 127.2, 50.5, 50.1, 47.0.

HRMS (ESI)  $m/z$ :  $[\text{M}+\text{H}]^+$  calcd for  $\text{C}_{18}\text{H}_{16}\text{Cl}_2\text{NO}$ , 332.0609; found: 332.0618.

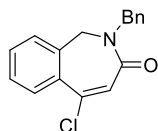

### 2-benzyl-5-chloro-1,2-dihydro-3H-benzo[c]azepin-3-one (2x)

Compound **2x** was prepared according to the general procedure and was isolated as a white solid (50 mg, 88% yield) after silica gel column chromatography (Petroleum/EtOAc=10/1).

$^1\text{H}$  NMR (400 MHz,  $\text{CDCl}_3$ )  $\delta$  7.79 (d,  $J = 7.6$  Hz, 1H), 7.41 (td,  $J = 7.8, 1.1$  Hz, 1H), 7.32 – 7.25 (m, 4H), 7.24 – 7.19 (m, 2H), 6.89 (d,  $J = 7.4$  Hz, 1H), 6.83 (s, 1H), 4.65 (s, 2H), 4.21 (s, 2H).

$^{13}\text{C}$  NMR (100 MHz,  $\text{CDCl}_3$ )  $\delta$  164.3, 141.1, 136.6, 136.5, 134.7, 130.4, 128.8, 128.7, 128.5, 128.3, 127.7, 127.3, 125.9, 50.2, 50.1.

HRMS (ESI)  $m/z$ :  $[\text{M}+\text{H}]^+$  calcd for  $\text{C}_{17}\text{H}_{15}\text{ClNO}$ , 284.0842; found: 284.0844.

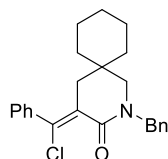

### (Z)-2-benzyl-4-(chloro(phenyl)methylene)-2-azaspiro[5.5]undecan-3-one (2y)

Compound **2y** was prepared according to the general procedure and was isolated as a yellow oil (69 mg, 91% yield) after silica gel column chromatography (Petroleum/EtOAc=10/1).

$^1\text{H}$  NMR (400 MHz,  $\text{CDCl}_3$ )  $\delta$  7.37 – 7.31 (m, 5H), 7.31 – 7.18 (m, 5H), 4.52 (s, 2H), 3.07 (s, 2H), 2.70 (s, 2H), 1.55 – 1.39 (m, 5H), 1.38 – 1.20 (m, 5H).

$^{13}\text{C}$  NMR (100 MHz,  $\text{CDCl}_3$ )  $\delta$  163.3, 142.6, 140.5, 137.3, 128.6, 128.4, 128.1, 127.9, 127.45, 127.40, 56.6, 50.6, 40.0, 35.0, 33.8, 26.1, 21.7.

HRMS (ESI)  $m/z$ :  $[\text{M}+\text{H}]^+$  calcd for  $\text{C}_{24}\text{H}_{27}\text{ClNO}$ , 380.1781; found: 380.1788.

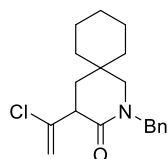

### 2-benzyl-4-(1-chlorovinyl)-2-azaspiro[5.5]undecan-3-one (4a)

Compound **4a** was prepared according to the general procedure and was isolated as a yellow oil

(58 mg, 91% yield) after silica gel column chromatography (Petroleum/EtOAc=10/1).

$^1\text{H}$  NMR (400 MHz,  $\text{CDCl}_3$ )  $\delta$  7.38 – 7.19 (m, 5H), 5.37 (dd,  $J = 9.8, 1.1$  Hz, 2H), 4.68 (d,  $J = 14.5$  Hz, 1H), 4.54 (d,  $J = 14.5$  Hz, 1H), 3.60 – 3.38 (m, 1H), 3.02 (s, 2H), 1.96 – 1.84 (m, 2H), 1.49 – 1.10 (m, 10H).

$^{13}\text{C}$  NMR (100 MHz,  $\text{CDCl}_3$ )  $\delta$  167.4, 141.4, 137.1, 128.6, 128.3, 127.5, 115.9, 56.4, 51.0, 48.6, 37.3, 32.3, 31.7, 26.2, 21.6, 21.3.

HRMS (ESI)  $m/z$ :  $[\text{M}+\text{H}]^+$  calcd for  $\text{C}_{19}\text{H}_{25}\text{ClNO}$ , 318.1625; found: 318.1633.

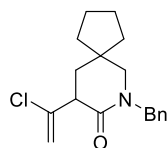

#### 7-benzyl-9-(1-chlorovinyl)-7-azaspiro[4.5]decan-8-one (4b)

Compound **4b** was prepared according to the general procedure and was isolated as a yellow oil (56 mg, 92% yield) after silica gel column chromatography (Petroleum/EtOAc=10/1).

$^1\text{H}$  NMR (400 MHz,  $\text{CDCl}_3$ )  $\delta$  7.36 – 7.27 (m, 5H), 5.39 (d,  $J = 1.3$  Hz, 1H), 5.36 (s, 1H), 4.61 (q,  $J = 14.5$  Hz, 2H), 3.52 (dd,  $J = 11.9, 6.8$  Hz, 1H), 3.18 (d,  $J = 12.1$  Hz, 1H), 2.84 (dd,  $J = 12.1, 2.8$  Hz, 1H), 2.26 – 2.12 (m, 1H), 1.81 – 1.74 (m, 1H), 1.72 – 1.62 (m, 2H), 1.60 – 1.53 (m, 2H), 1.48 – 1.37 (m, 4H).

$^{13}\text{C}$  NMR (100 MHz,  $\text{CDCl}_3$ )  $\delta$  167.4, 141.2, 136.9, 128.6, 128.3, 127.5, 116.0, 57.0, 51.0, 50.1, 41.1, 38.9, 37.9, 34.4, 24.8, 24.0.

HRMS (ESI)  $m/z$ :  $[\text{M}+\text{H}]^+$  calcd for  $\text{C}_{18}\text{H}_{23}\text{ClNO}$ , 304.1468; found: 304.1464.

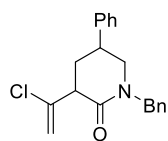

#### 1-benzyl-3-(1-chlorovinyl)-5-phenylpiperidin-2-one (4c)

Compound **4c** was prepared according to the general procedure and was isolated as a yellow oil (58 mg, 89% yield) after silica gel column chromatography (Petroleum/EtOAc=10/1).

$^1\text{H}$  NMR (400 MHz,  $\text{CDCl}_3$ )  $\delta$  7.64 (dd,  $J = 7.9, 1.0$  Hz, 1H), 7.41 – 6.80 (m, 7H), 6.79 – 6.58 (m, 2H), 5.62 (s, 1H), 5.31 (s, 1H), 4.58 (d,  $J = 15.1$  Hz, 1H), 4.28 (d,  $J = 15.1$  Hz, 1H), 3.64 – 3.48 (m, 2H), 3.17 – 3.01 (m, 2H), 2.25 – 2.12 (m, 2H).

$^{13}\text{C}$  NMR (100 MHz,  $\text{CDCl}_3$ )  $\delta$  170.2, 141.6, 138.0, 136.6, 132.8, 128.7, 128.6, 128.4, 127.4,

127.2, 127.0, 124.2, 111.2, 55.7, 49.5, 46.8, 34.0, 28.4.

HRMS (ESI)  $m/z$ :  $[M+H]^+$  calcd for  $C_{20}H_{21}ClNO$ , 326.1312; found: 326.1324.

## 4. Calculation results

### Computation Details

All the geometrical structures were optimized at the  $\omega$ B97X-D level with integral equation formalism model by the Gaussian 09 package<sup>1-3</sup>. The 6-31+G\* basis set was used for all atoms. Frequency analyses were done at the same level. For all the reactants, products and mediums, there are no imaginary frequencies. While, for transition states, there are only one imaginary frequency. All positive frequencies that are less than  $100\text{ cm}^{-1}$  are set to  $100\text{ cm}^{-1}$  for thermodynamics calculations<sup>4</sup>. The single point energies were revised at the M06-2X/6-311++G(2df,2p) level with SMD solvation model<sup>5-6</sup>. Relative energies include electronic energies and thermal corrections to Gibbs free energies.

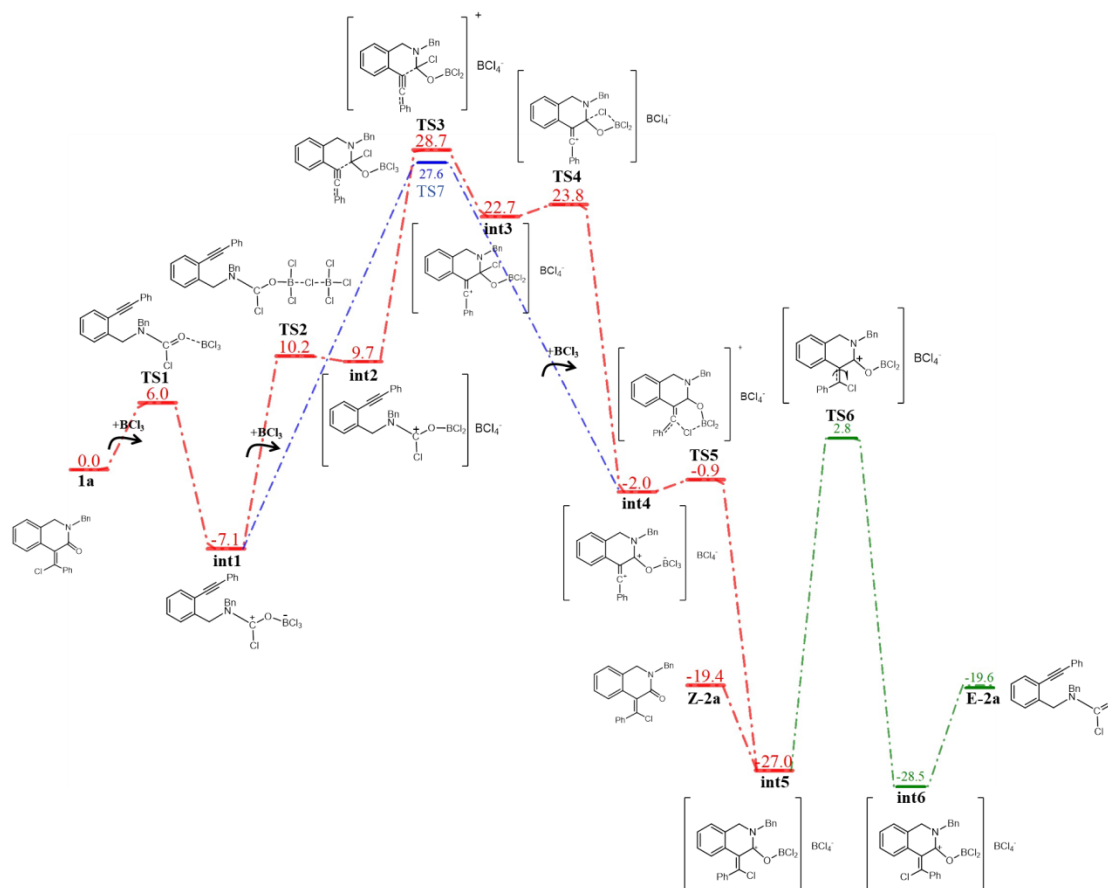

**Figure S1.** Simplified potential energy surface for reactant **1a**. The unit of relative energy is kcal/mol.

## 5. References

1. J. D. Chai, and M. Head-Gordon, *Phys. Chem. Chem. Phys.*, 2008, 10, 6615.
2. G. Scalmani, and M. J. Frisch, *J. Chem. Phys.* 2010, 132, 114110.
3. M. J. Frisch, G. W. Trucks, H. B. Schlegel, G. E. Scuseria, M. A. Robb, J. R. Cheeseman, G. Scalmani, V. Barone, B. Mennucci, G. A. Petersson, H. Nakatsuji, M. Caricato, X. Li, H. P. Hratchian, A. F. Izmaylov, J. Bloino, G. Zheng, J. L. Sonnenberg, M. Hada, M. Ehara, K. Toyota, R. Fukuda, J. Hasegawa, M. Ishida, T. Nakajima, Y. Honda, O. Kitao, H. Nakai, T. Vreven, J. J. A. Montgomery, J. E. Peralta, F. Ogliaro, M. Bearpark, J. J. Heyd, E. Brothers, K. N. Kudin, V. N. Staroverov, T. Keith, R. Kobayashi, J. Normand, K. Raghavachari, A. Rendell, J. C. Burant, S. S. Iyengar, J. Tomasi, M. Cossi, N. Rega, J. M. Millam, M. Klene, J. E. Knox, J. B. Cross, V. Bakken, C. Adamo, J. Jaramillo, R. Gomperts, R. E. Stratmann, O. Yazyev, A. J. Austin, R. Cammi, C. Pomelli, J. W. Ochterski, R. L. Martin, K. Morokuma, V. G. Zakrzewski, G. A. Voth, P. Salvador, J. J. Dannenberg, S. Dapprich, A. D. Daniels, O. Farkas, J. B. Foresman, J. V. Ortiz, J. Cioslowski, and D. J. Fox, *Gaussian 09, Revision D.01*, Wallingford CT: Gaussian, Inc. 2013.
4. T. Lu, and Q. Chen, *Comput. Theor. Chem.*, 2021, 1200, 113249.
5. Y. Zhao, and D. G. Truhlar, *Theor. Chem. Acc.*, 2008, 120, 215.
6. A. V. Marenich, C. J. Cramer, and D. G. Truhlar, *J. Phys. Chem. B*, 2009, 113, 6378.



## 6. Copies of NMR Spectra

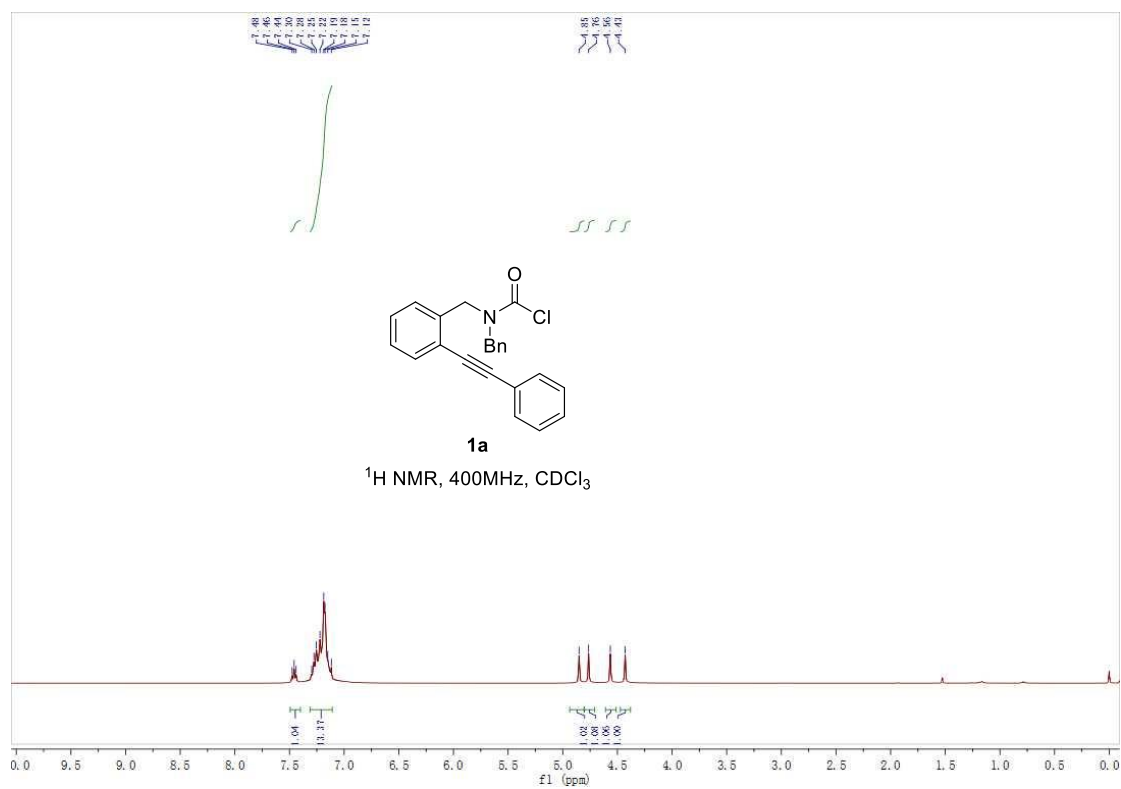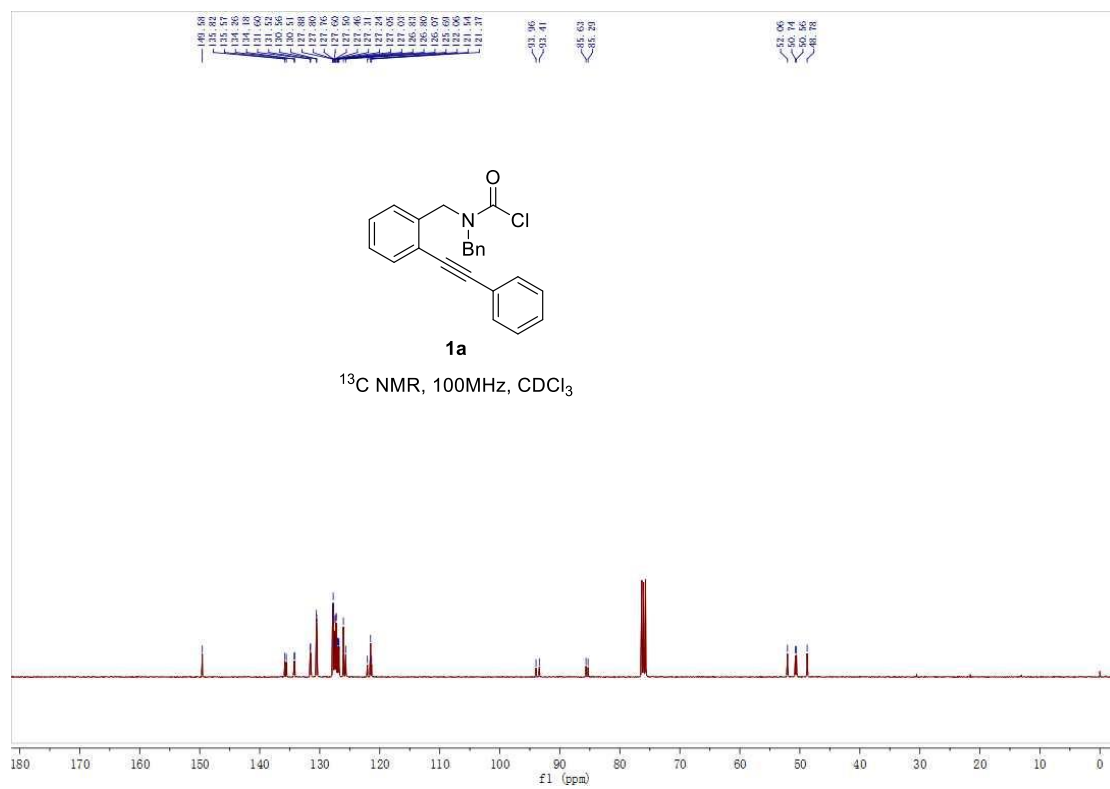

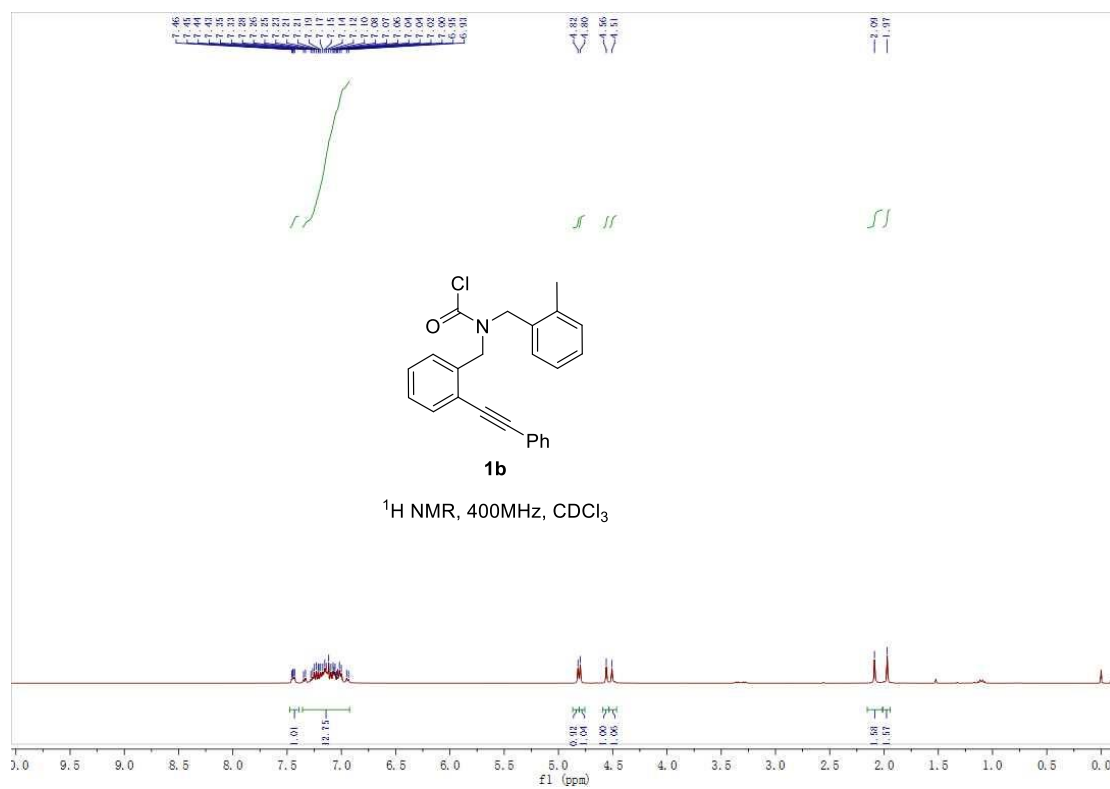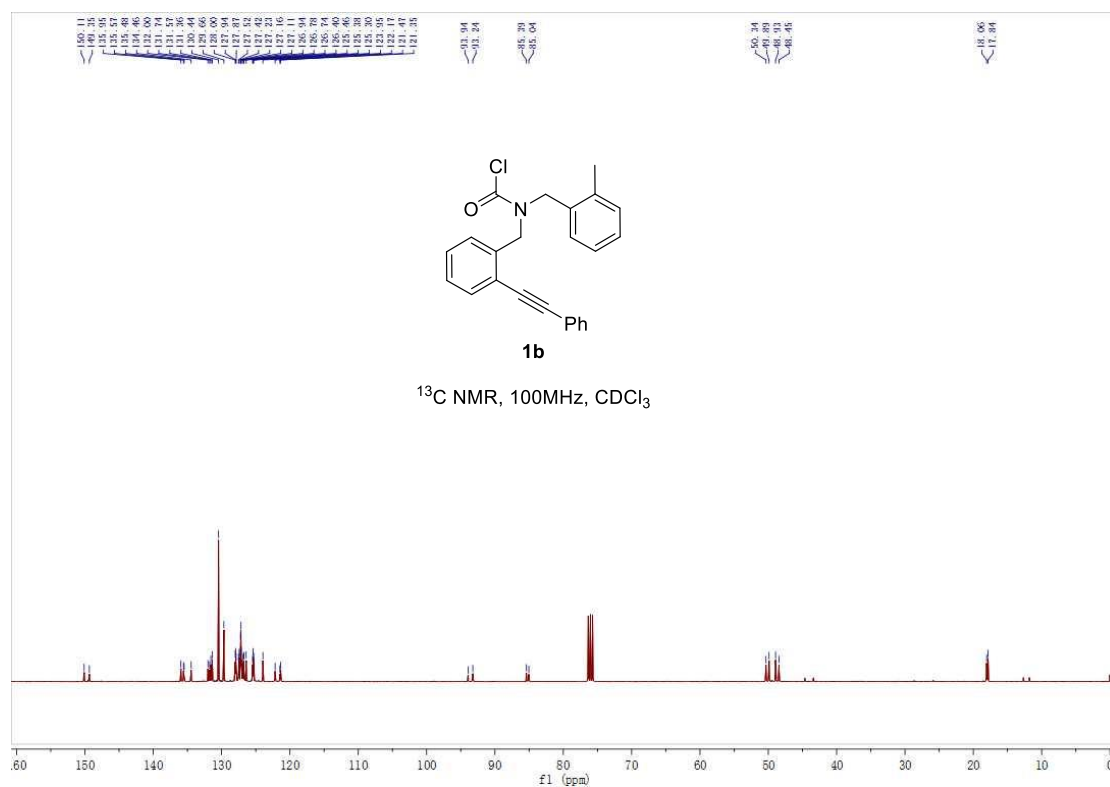

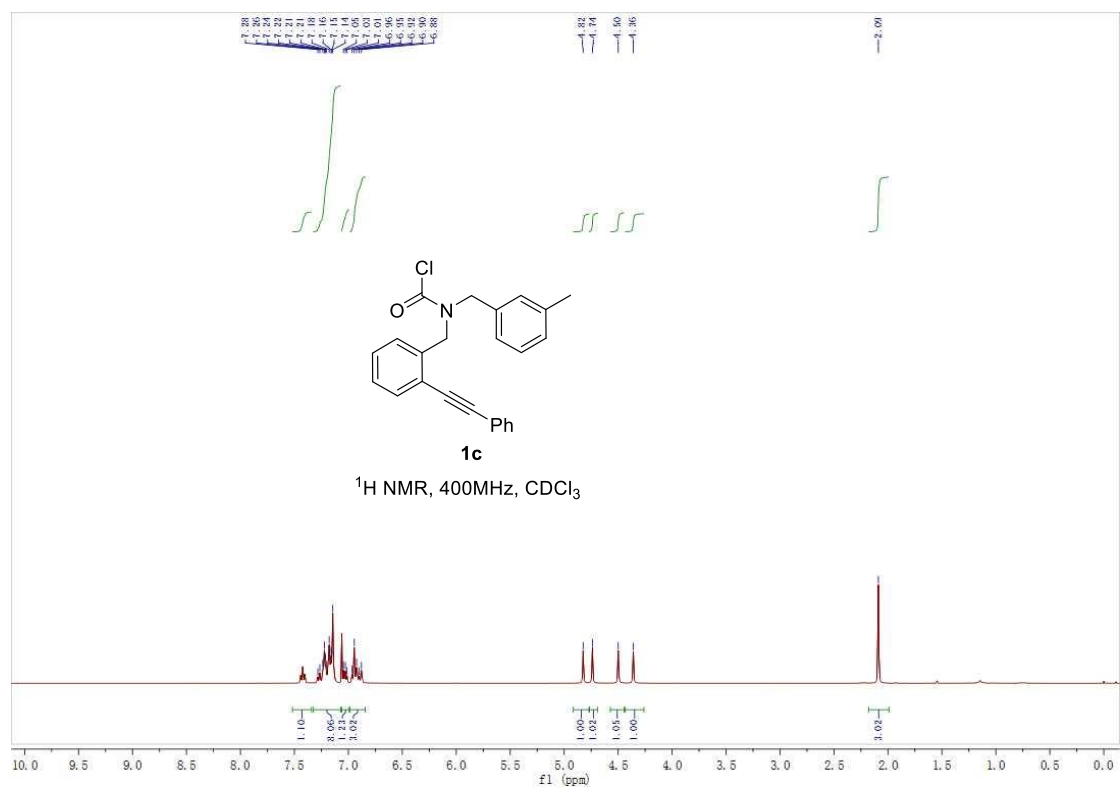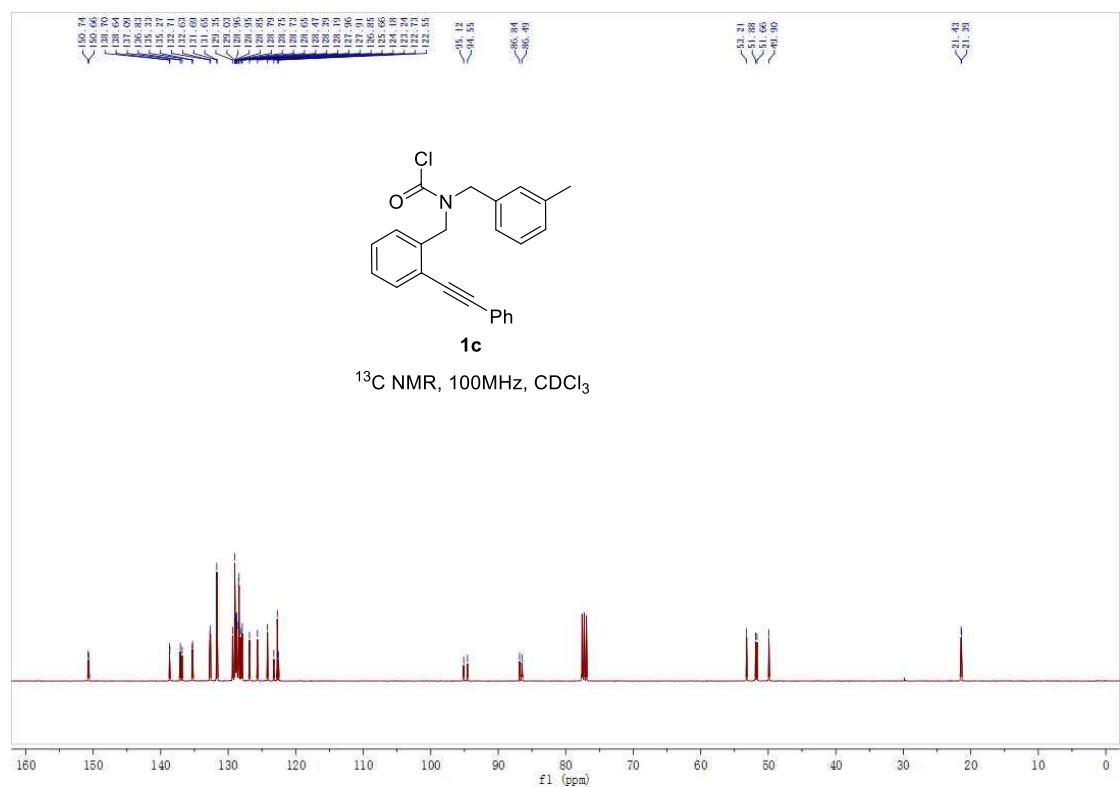

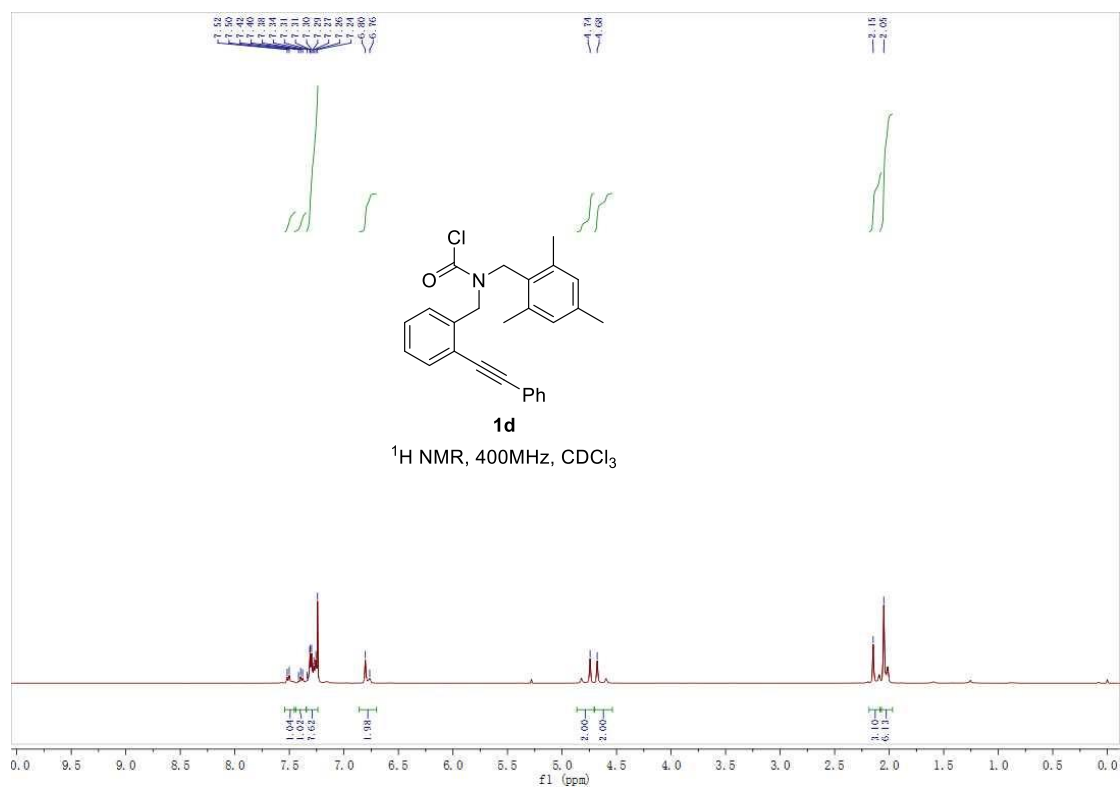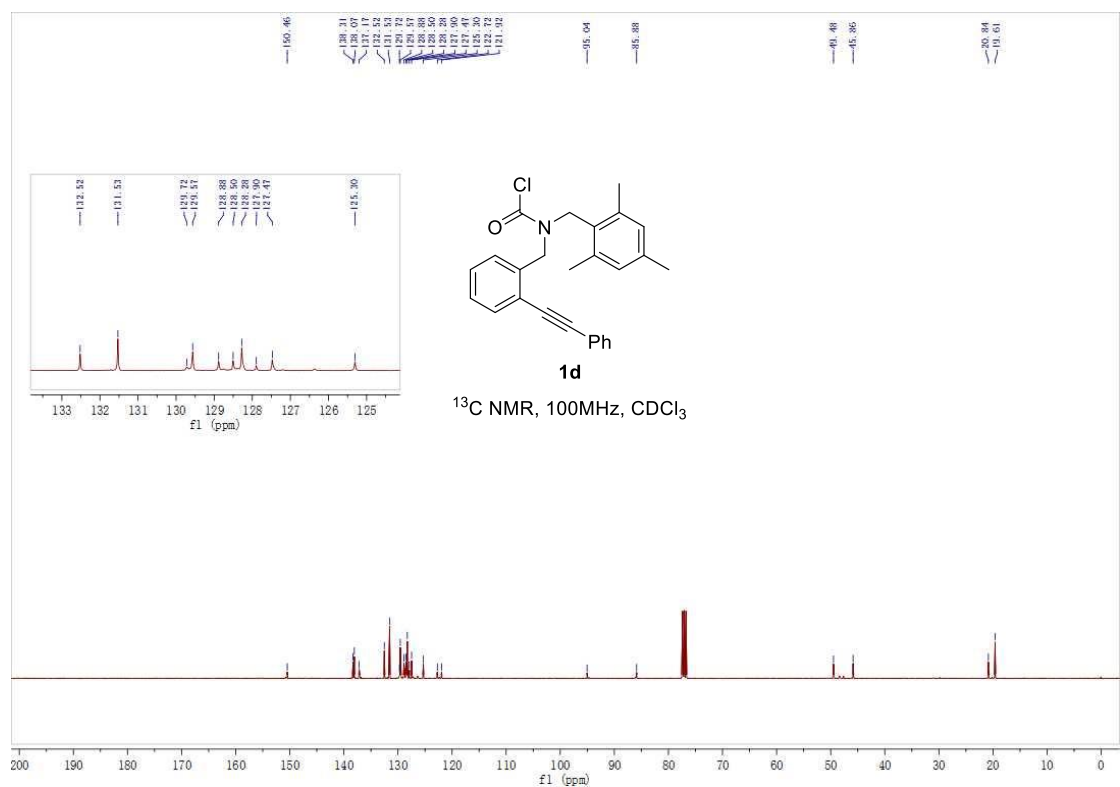

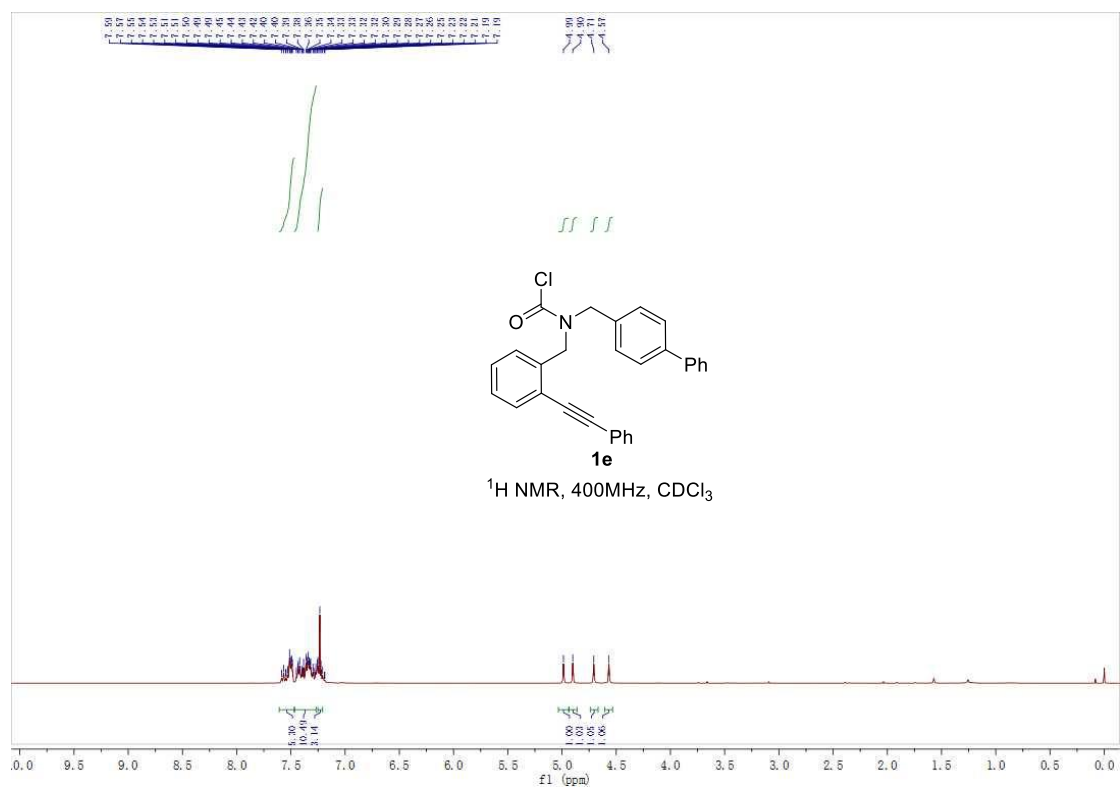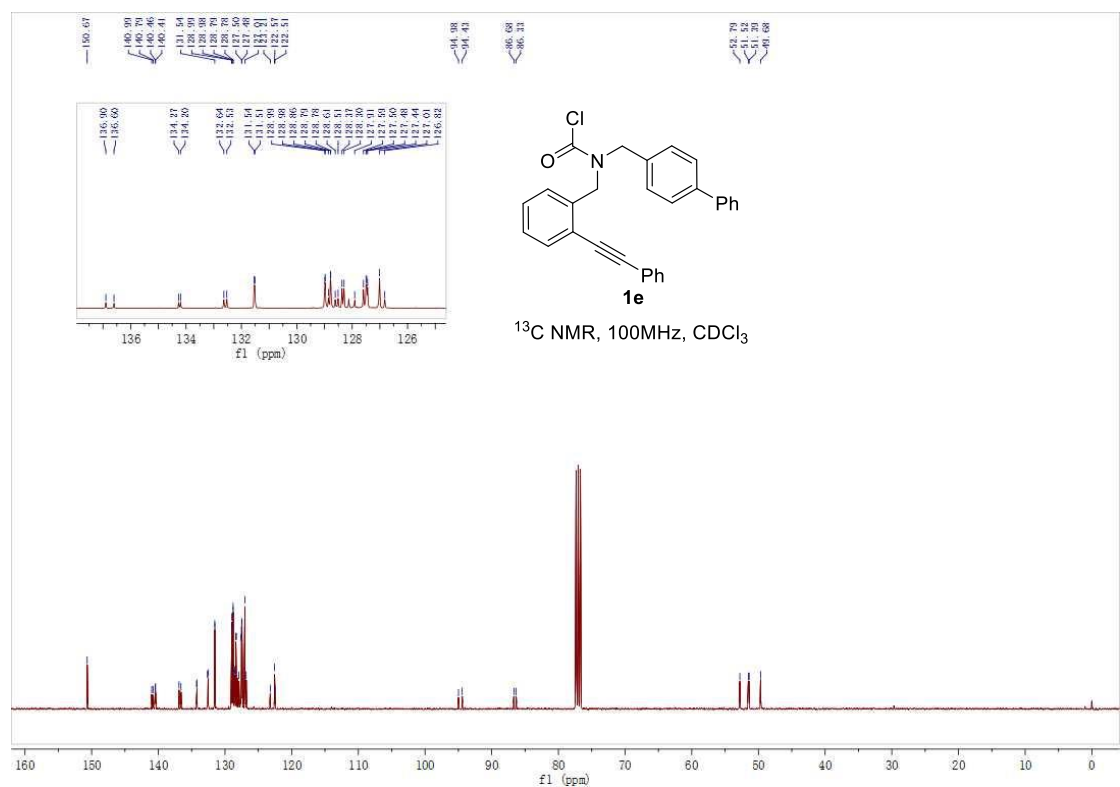

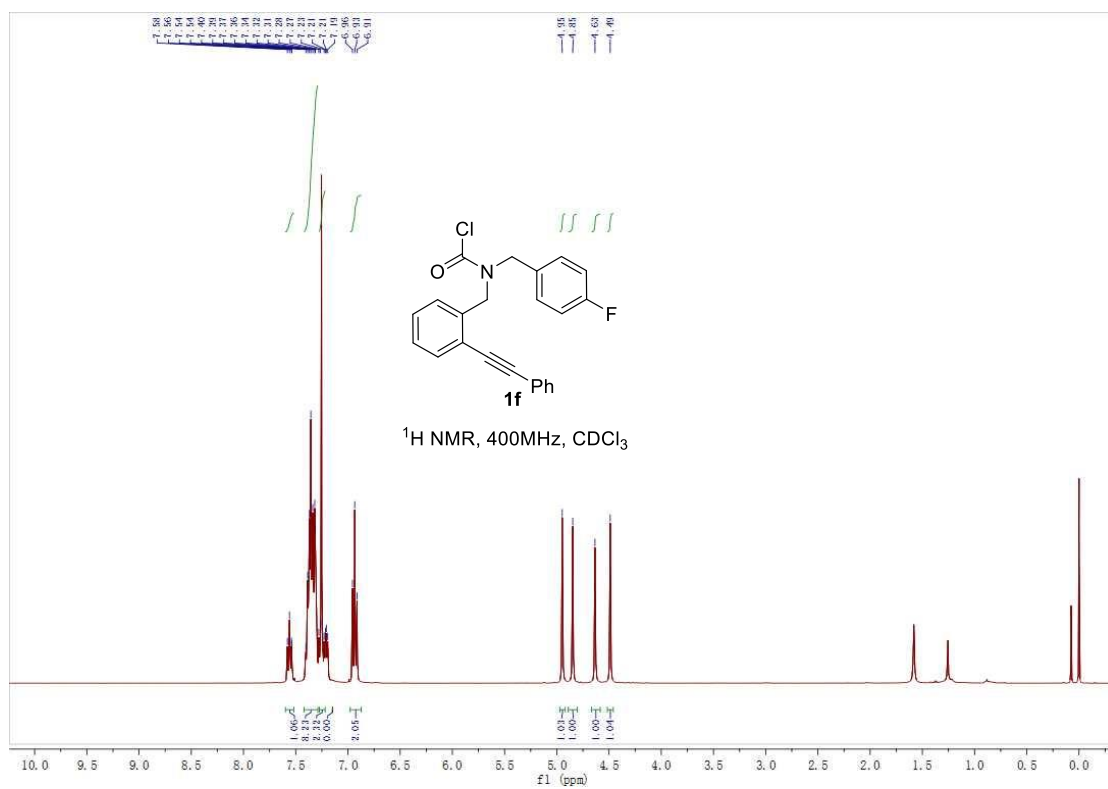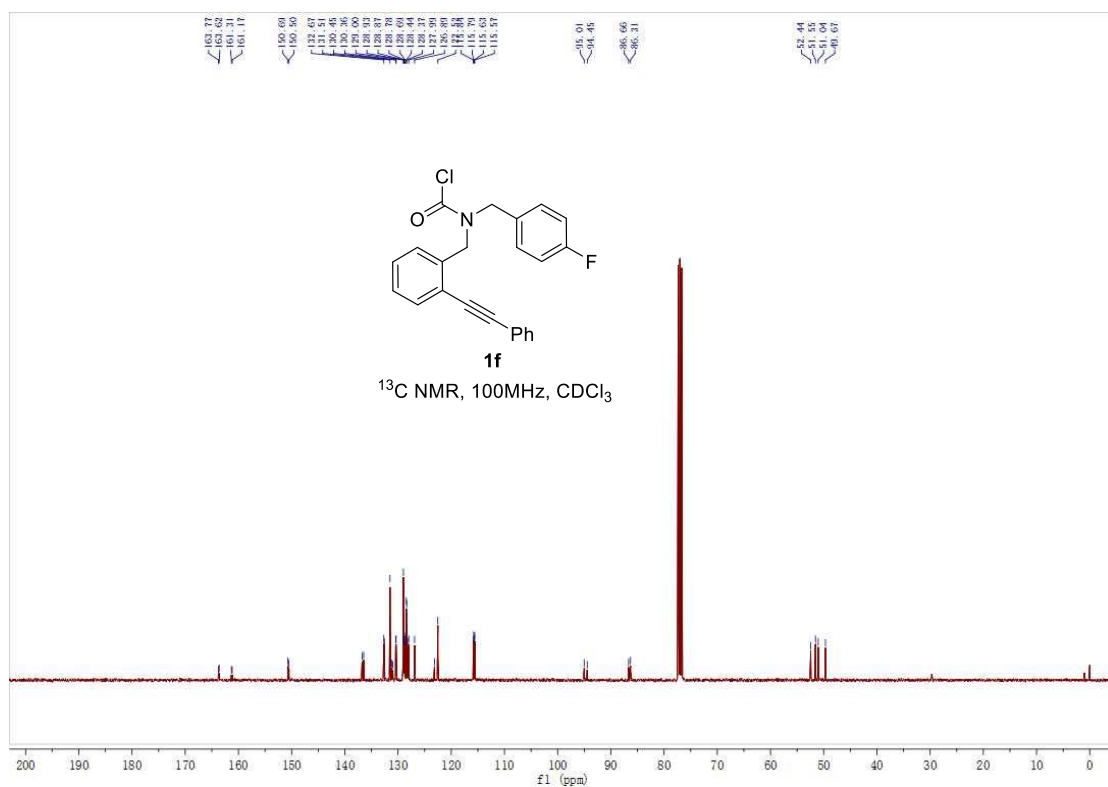

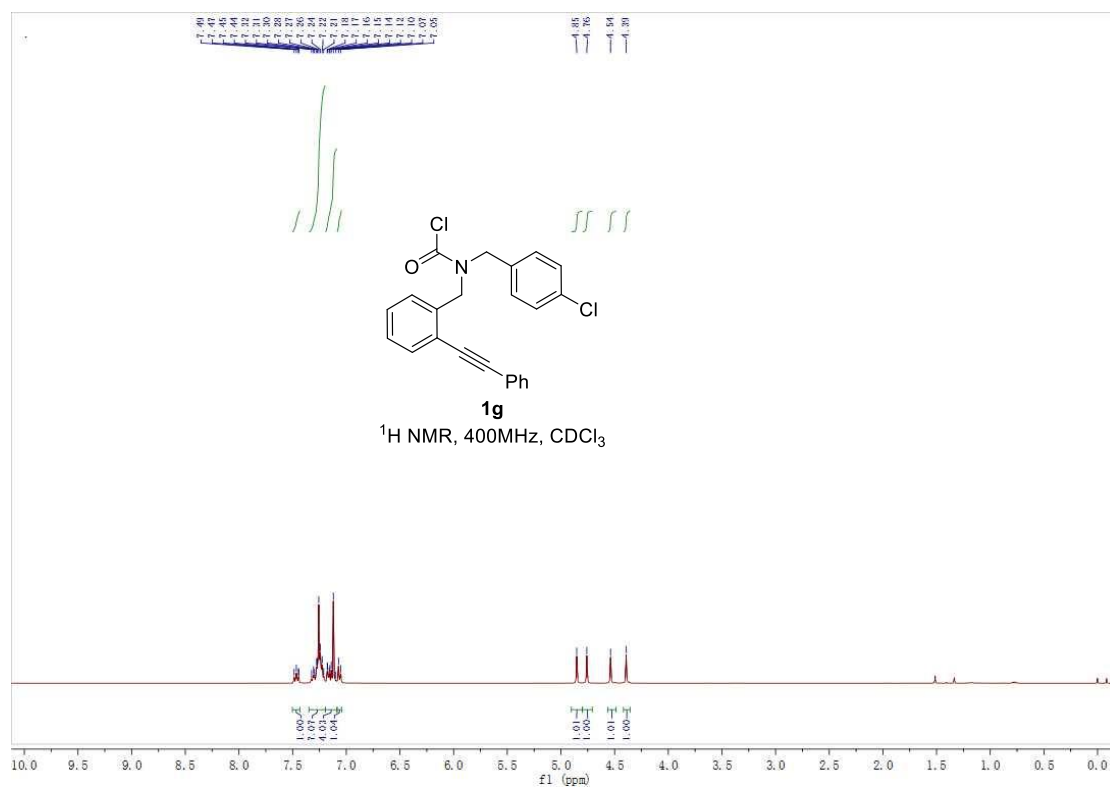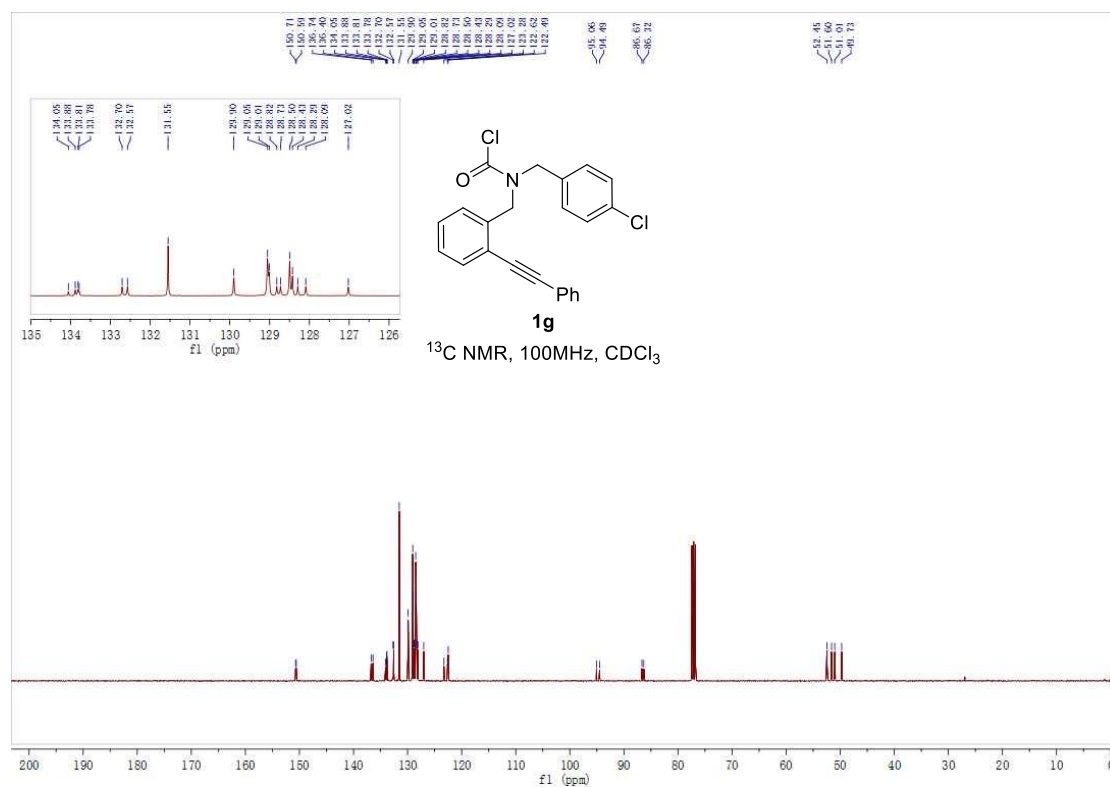

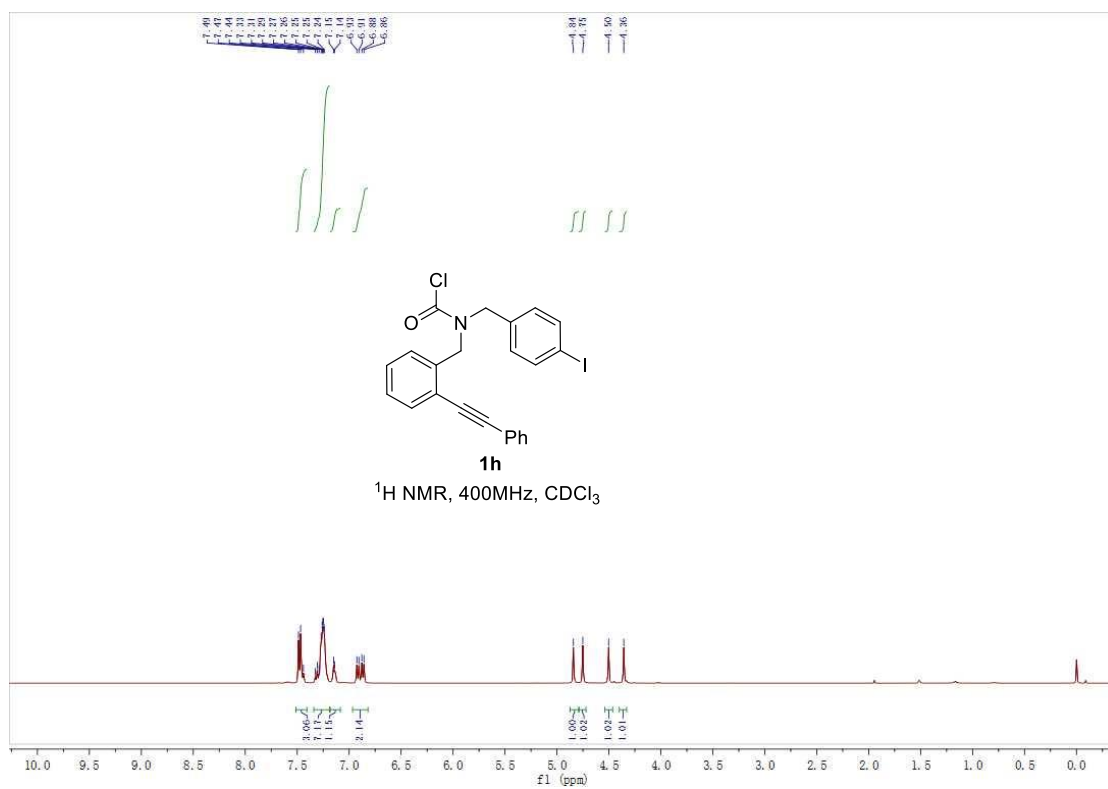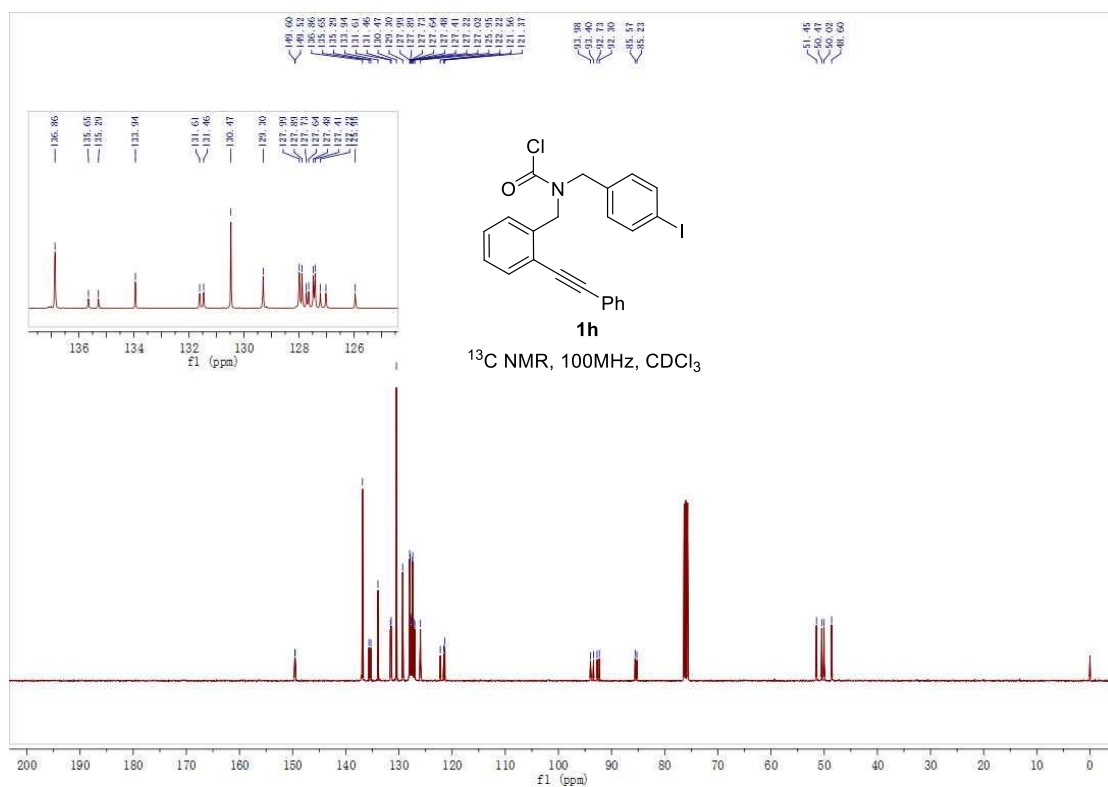





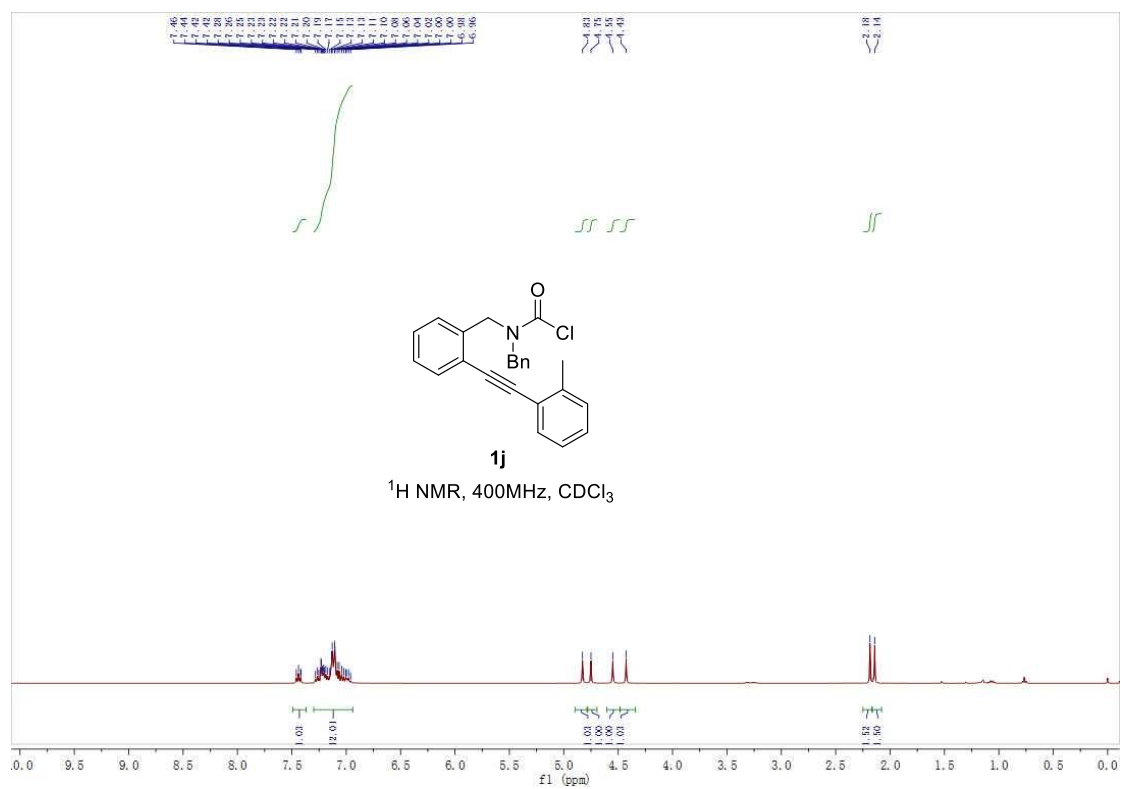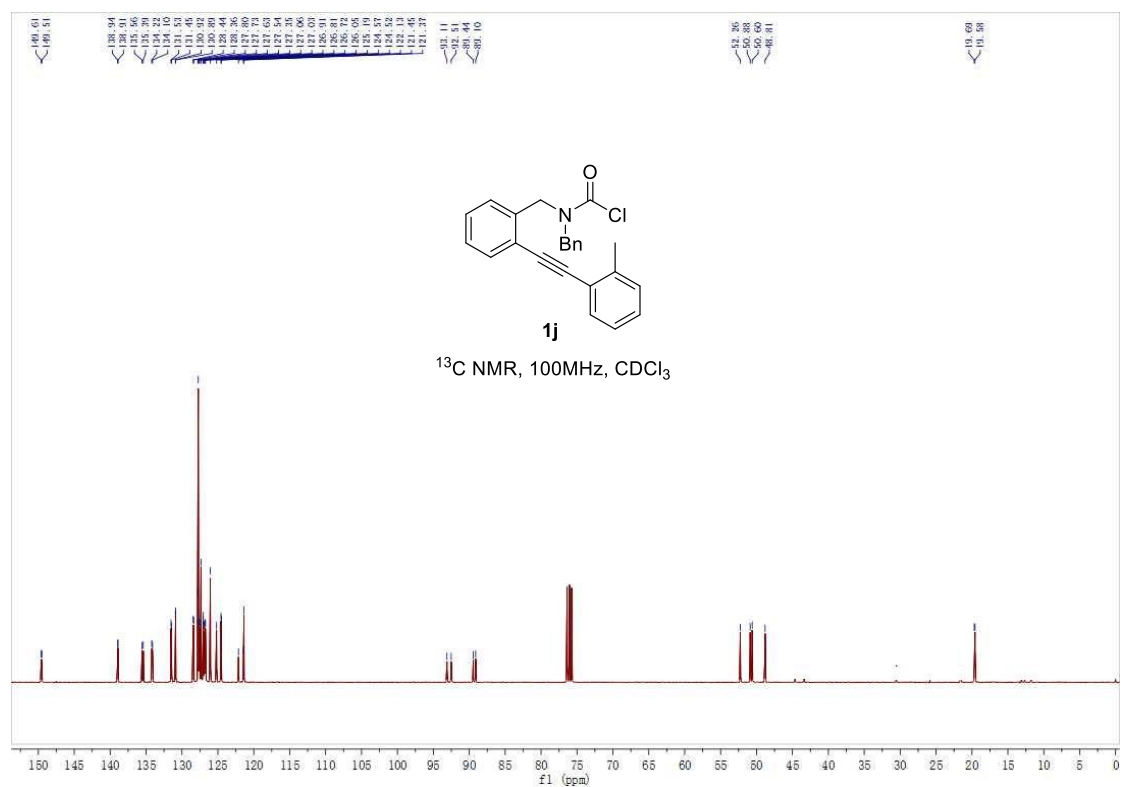

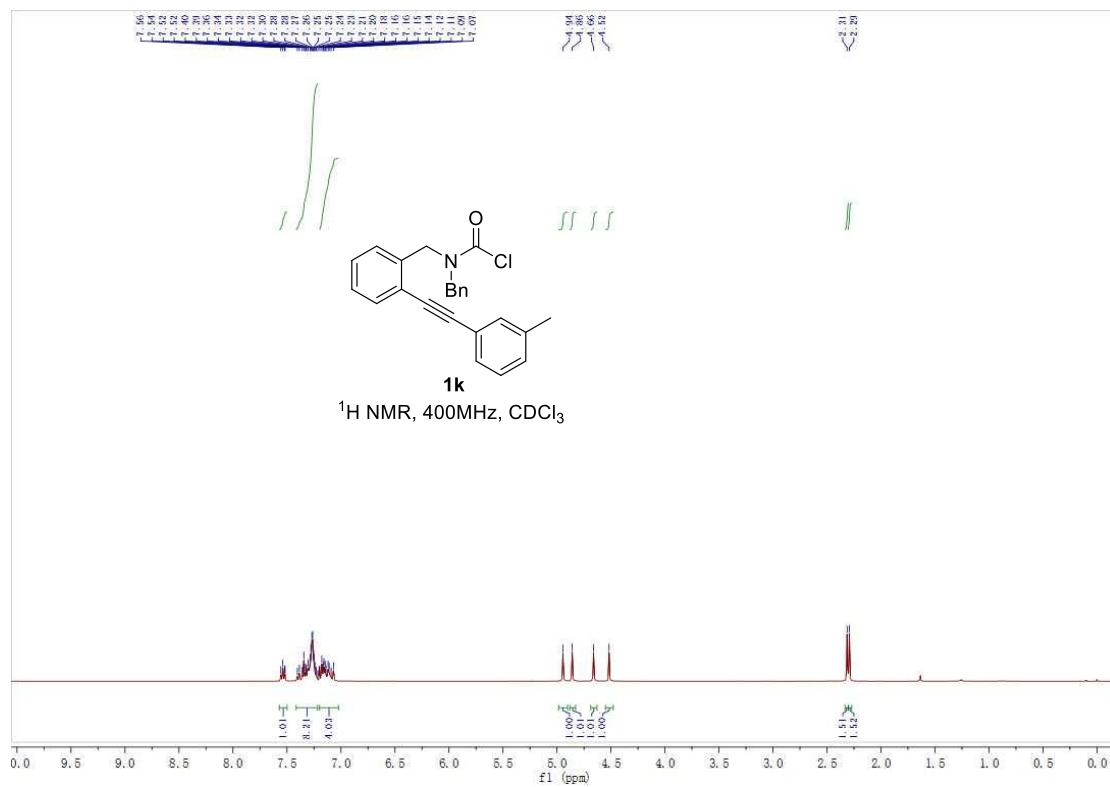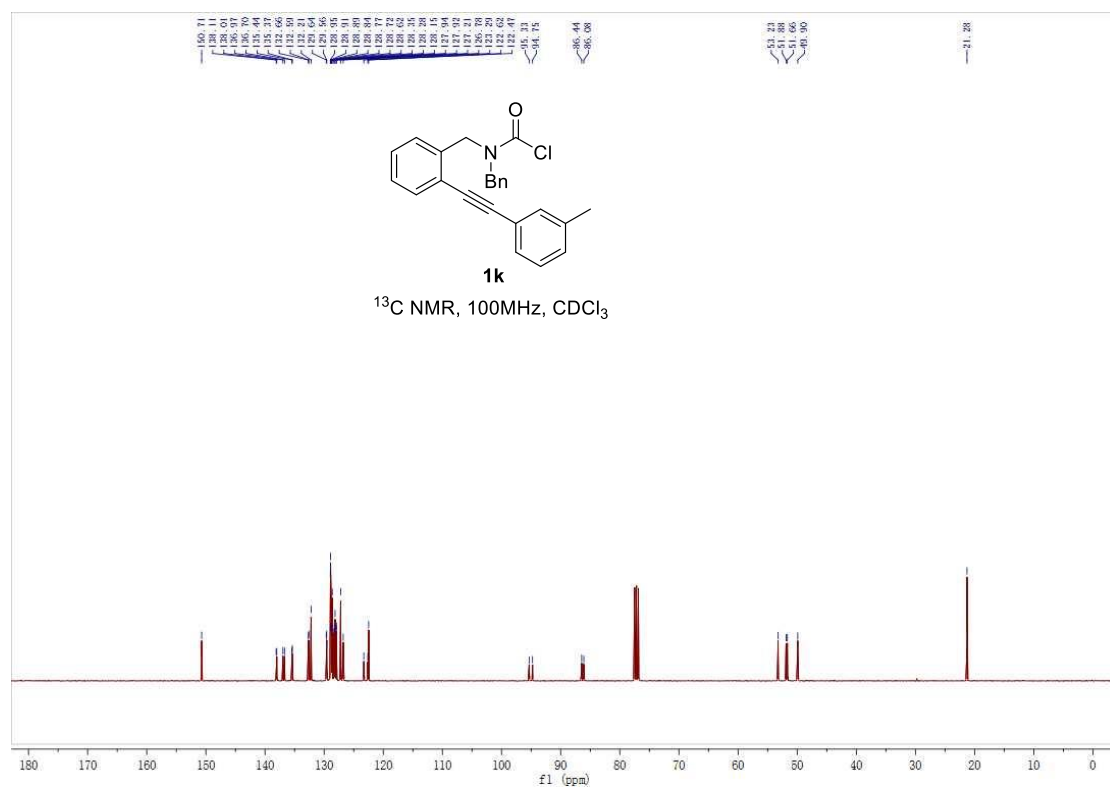

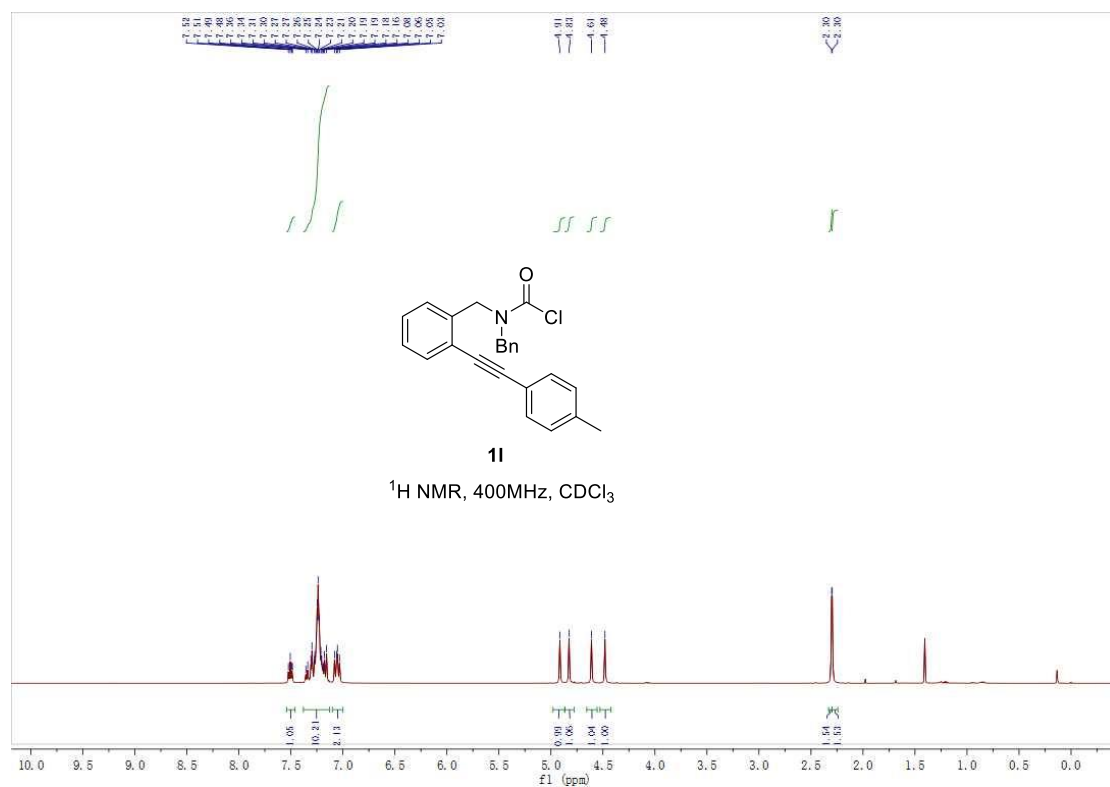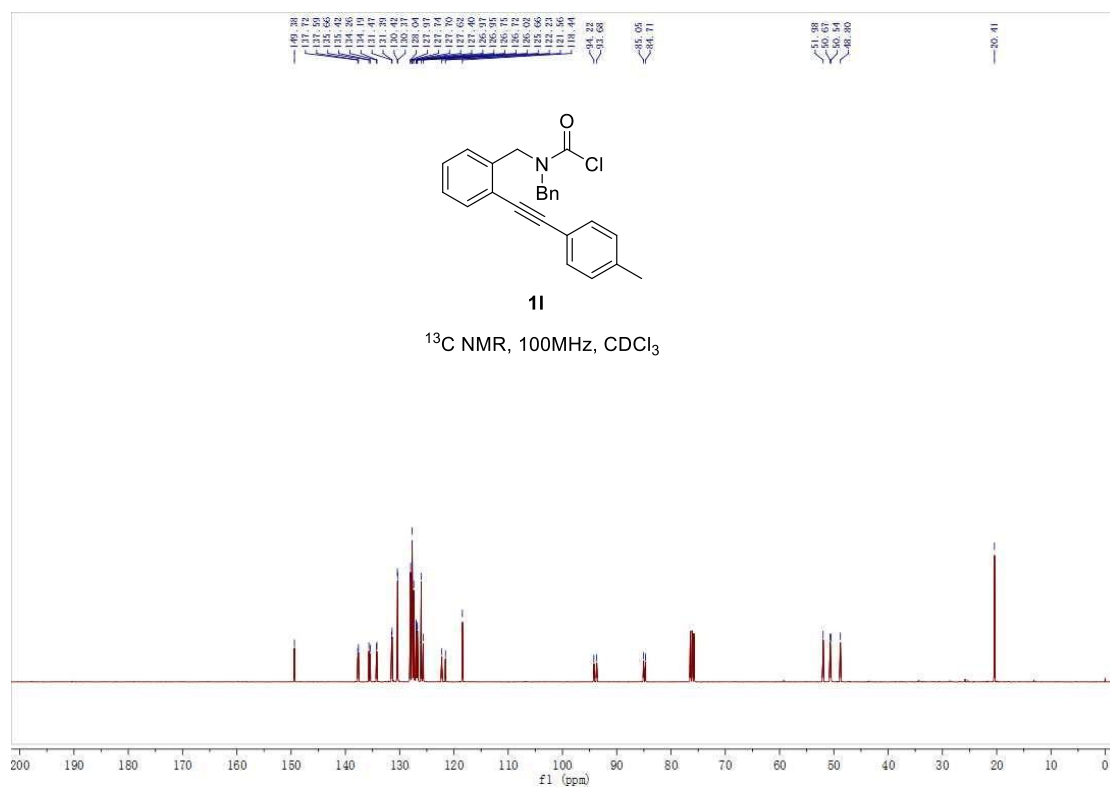

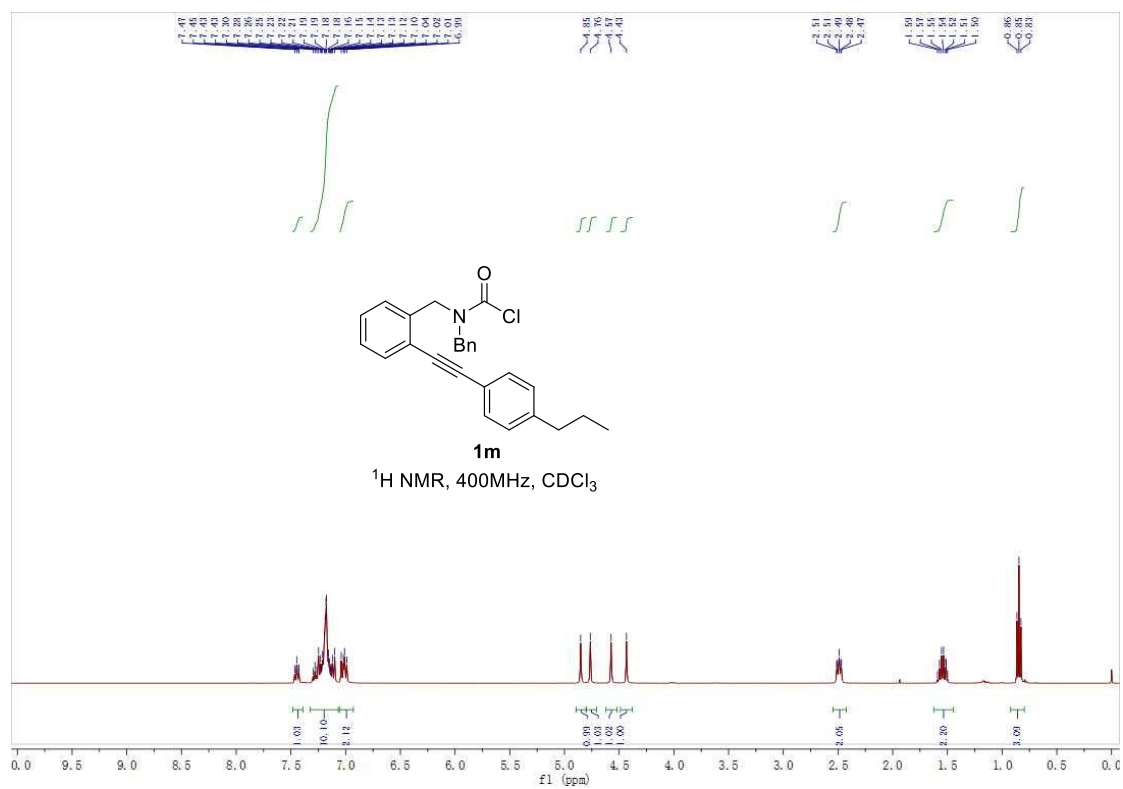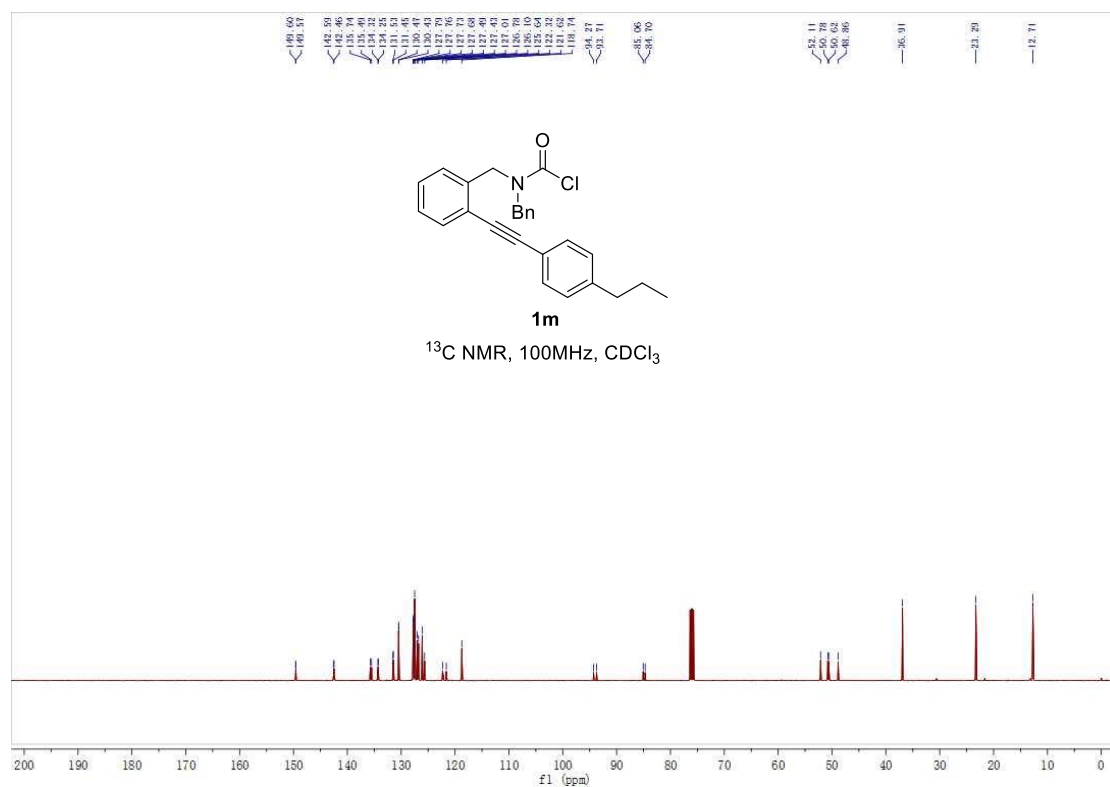

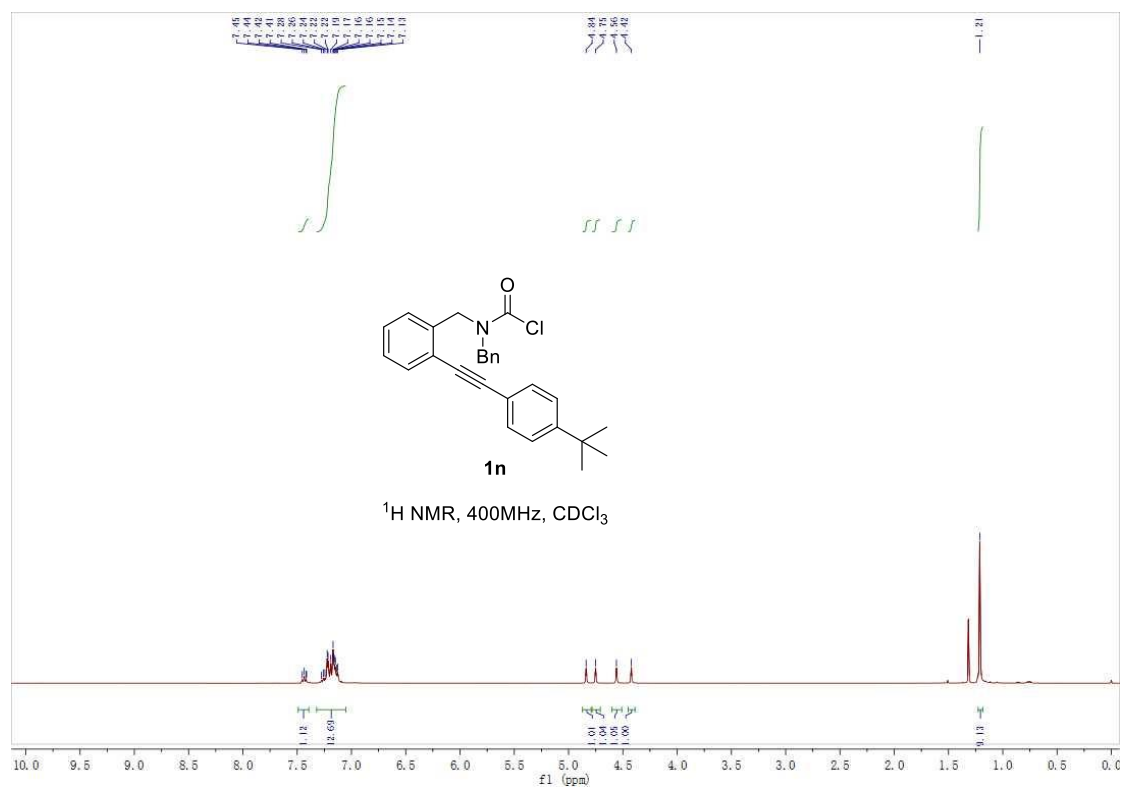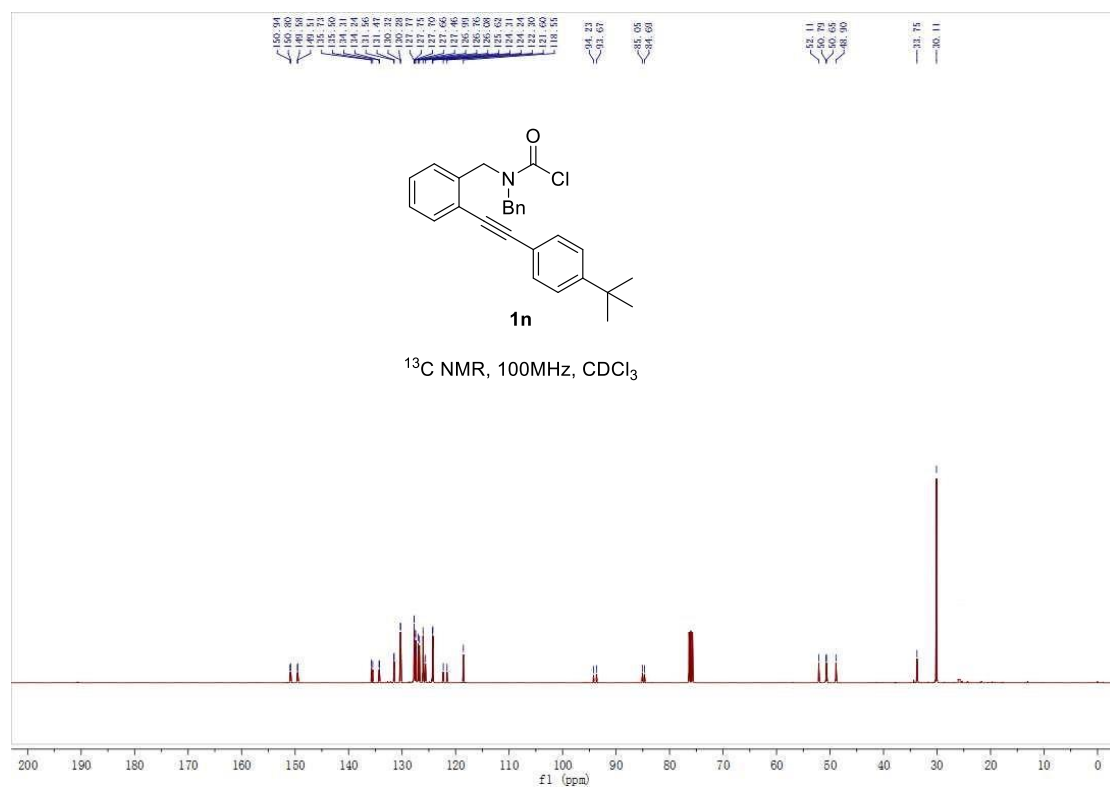

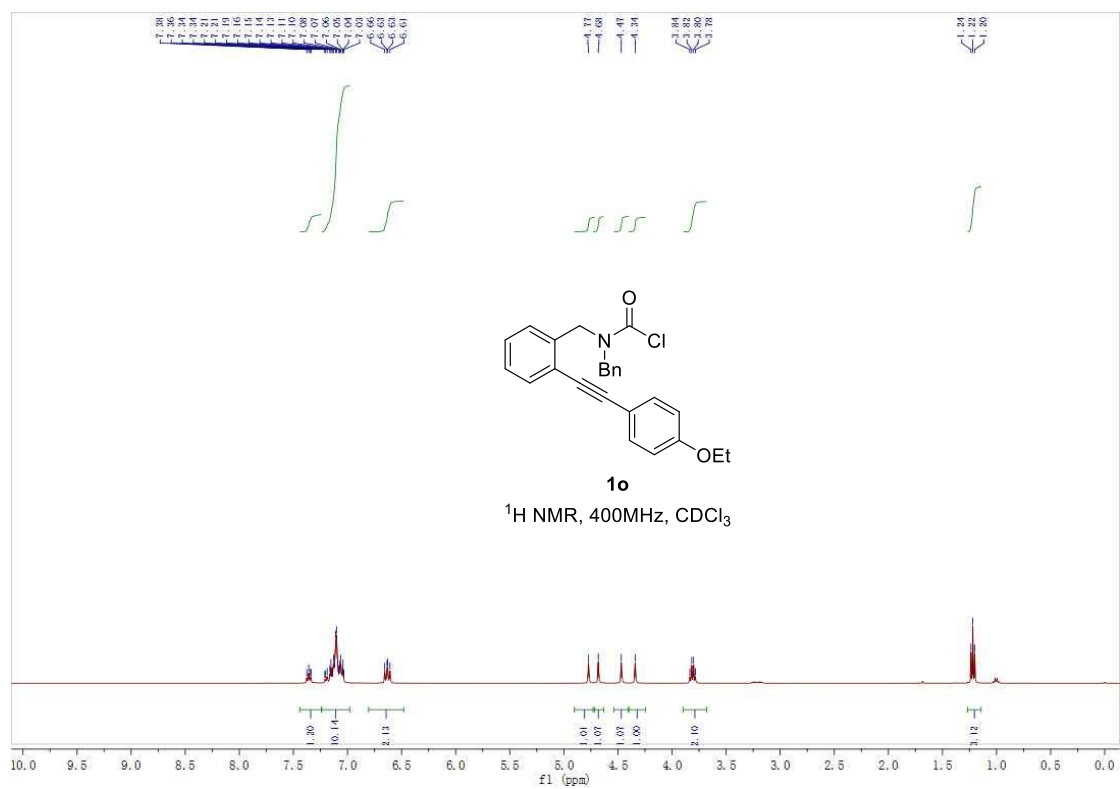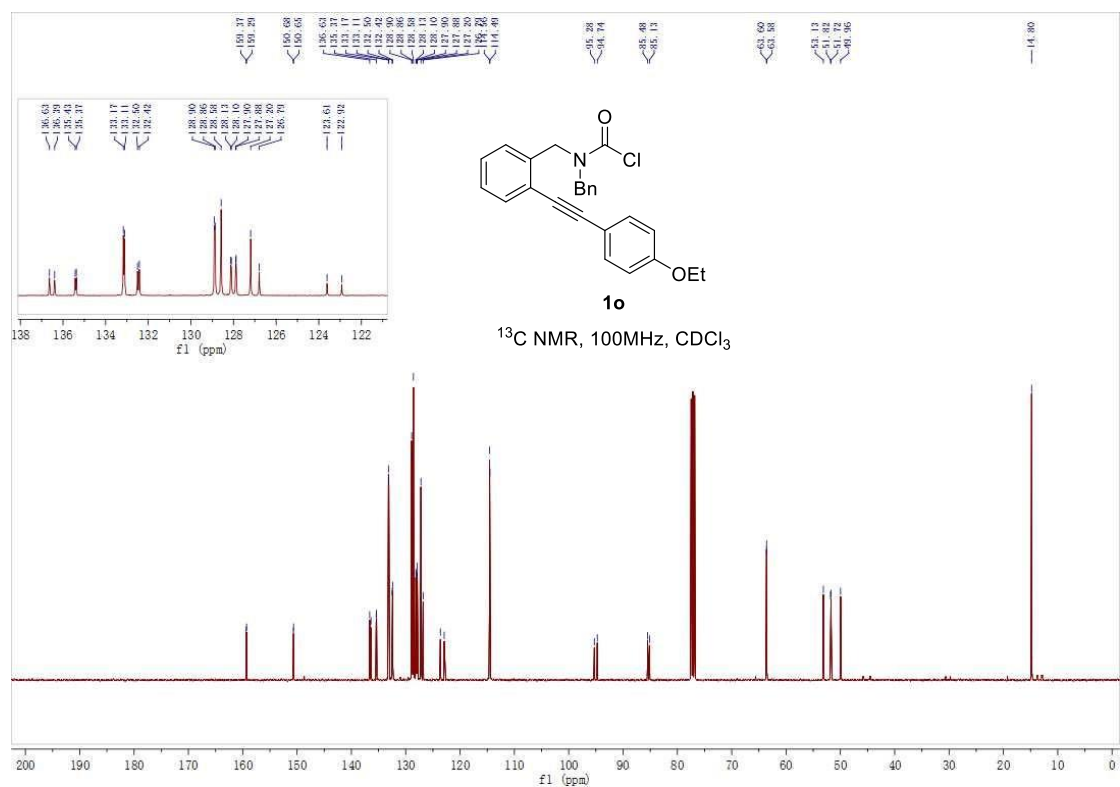

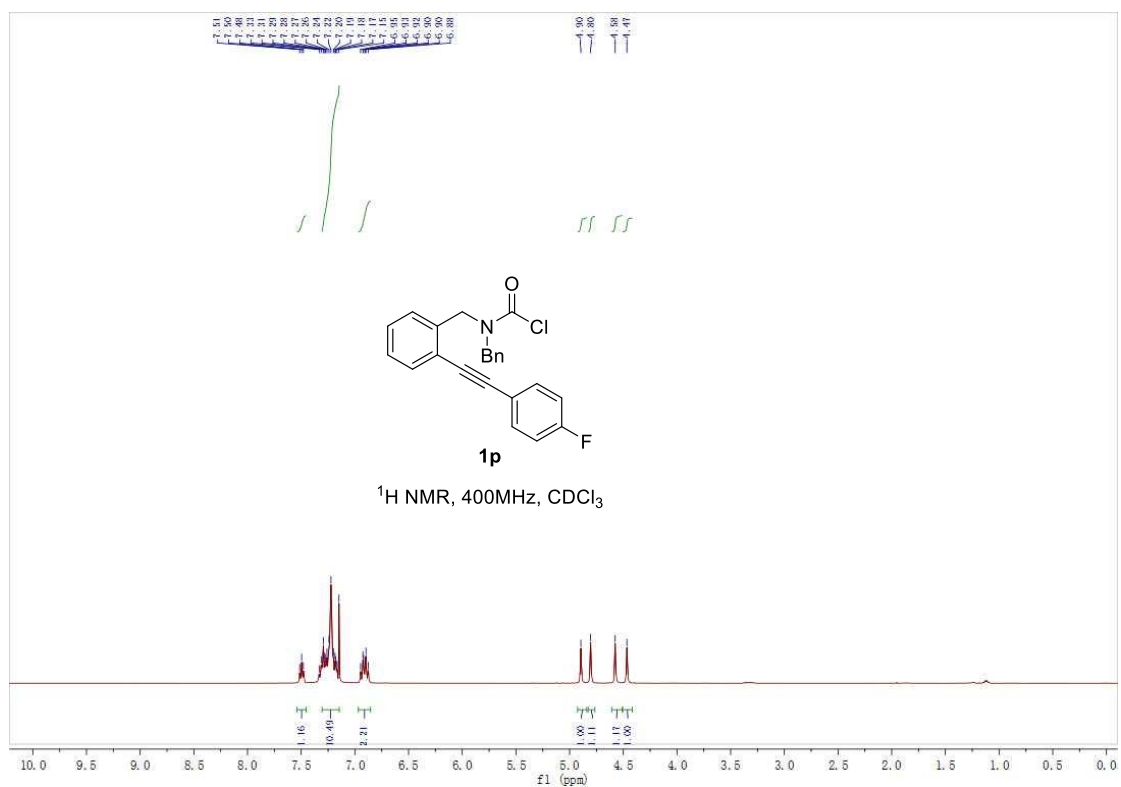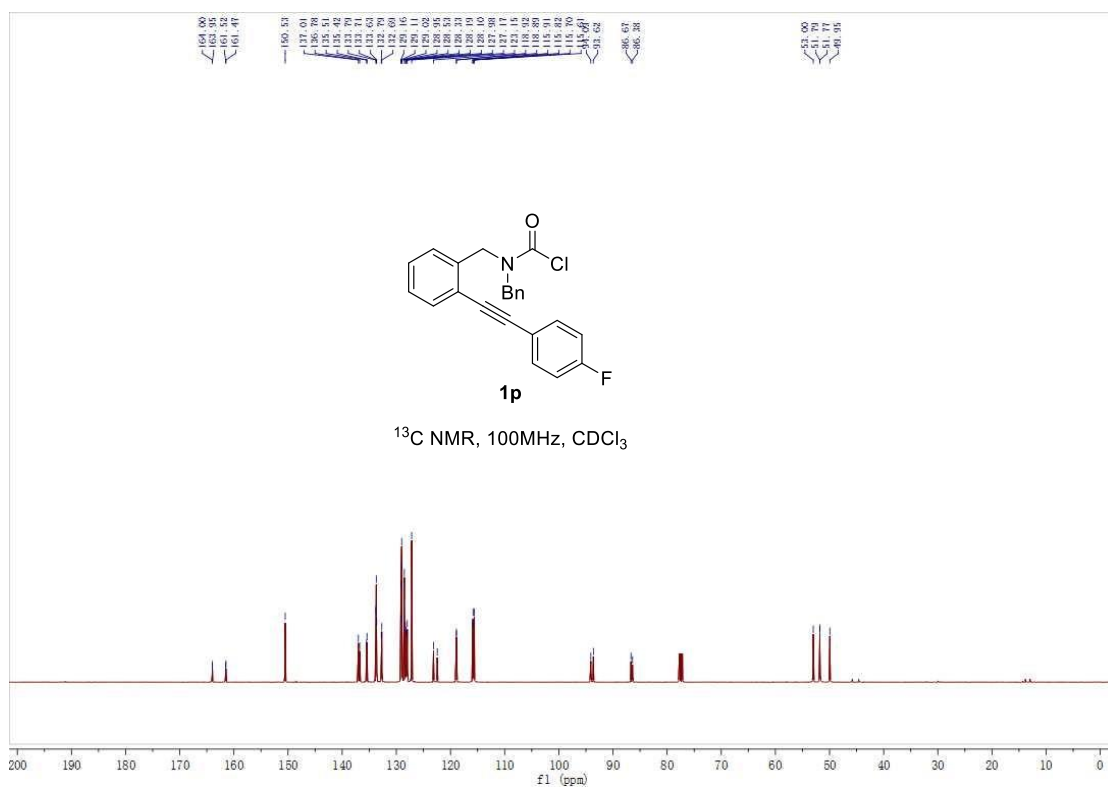



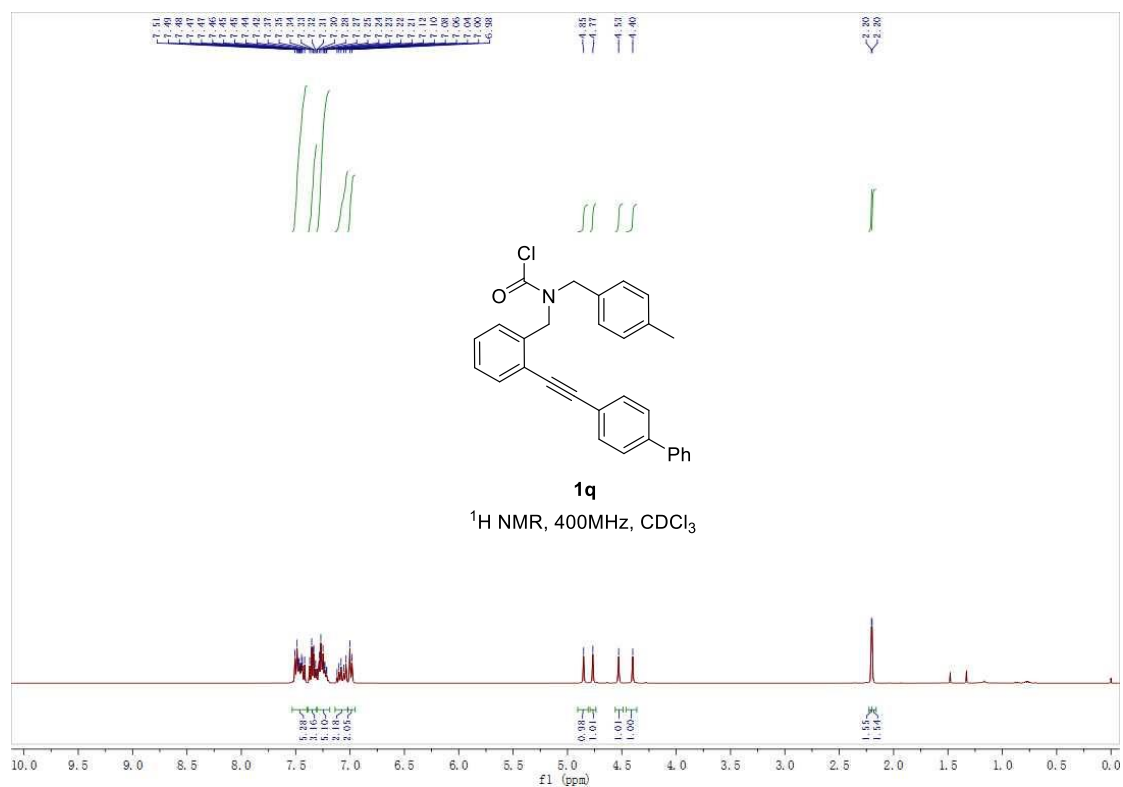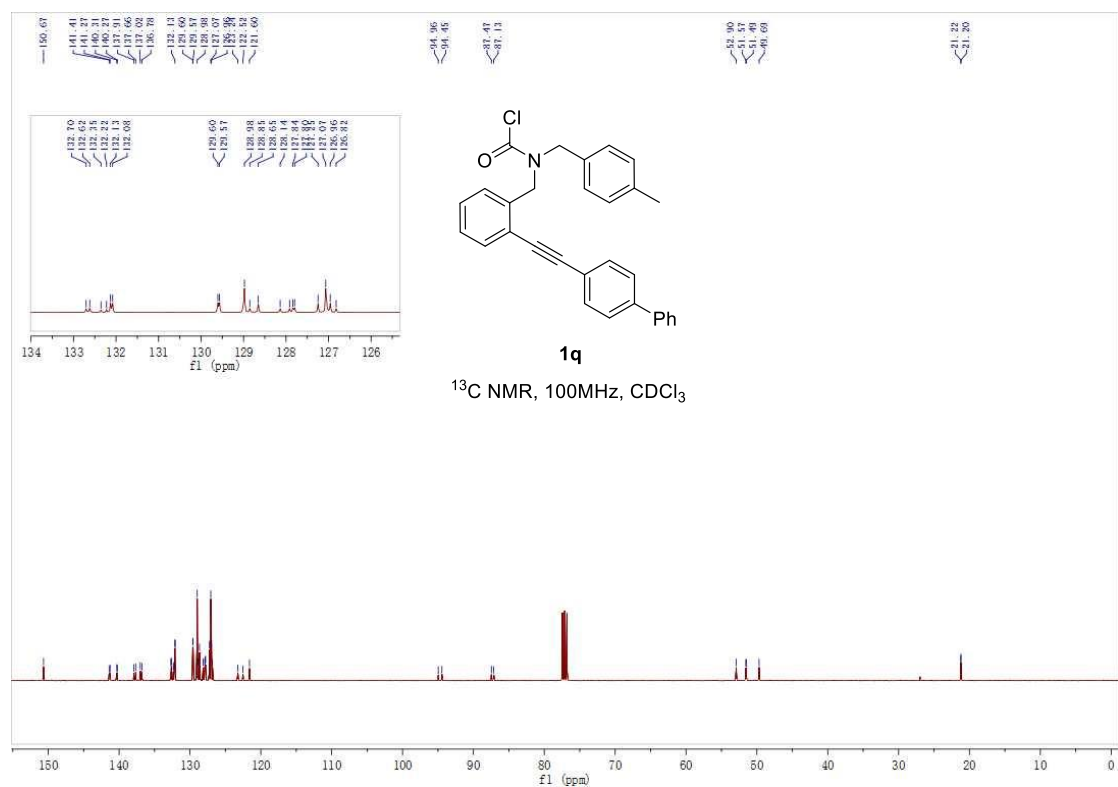

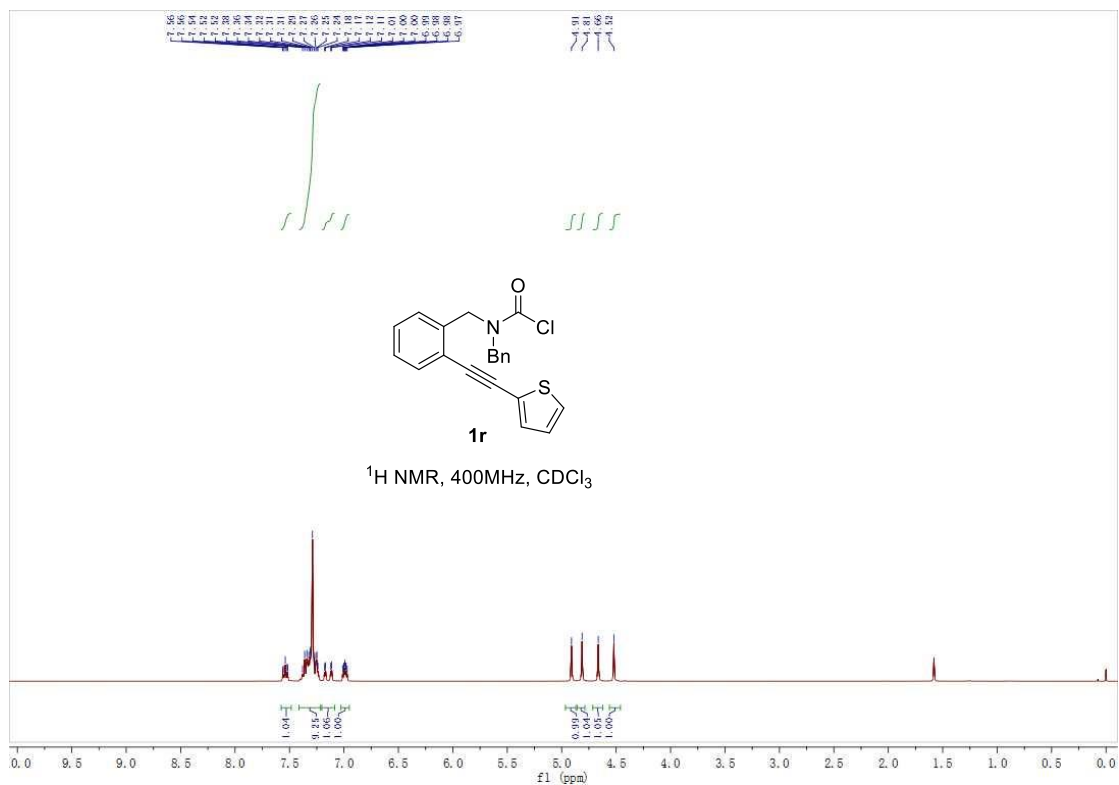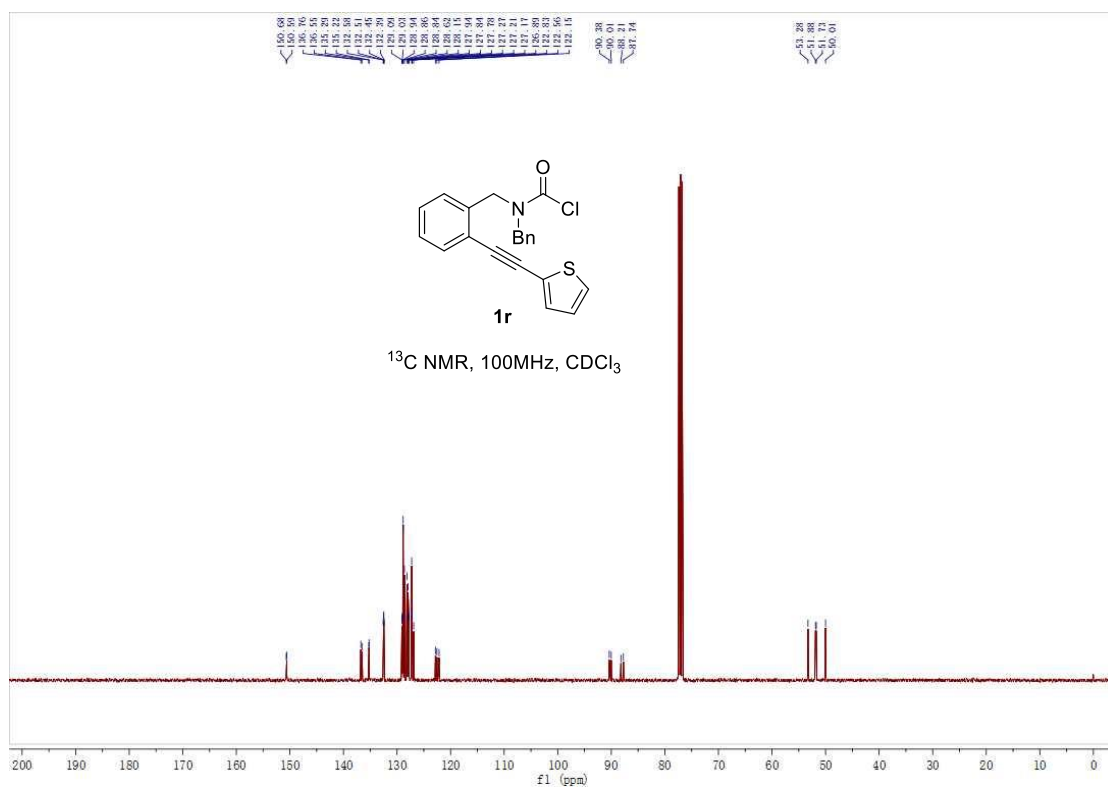

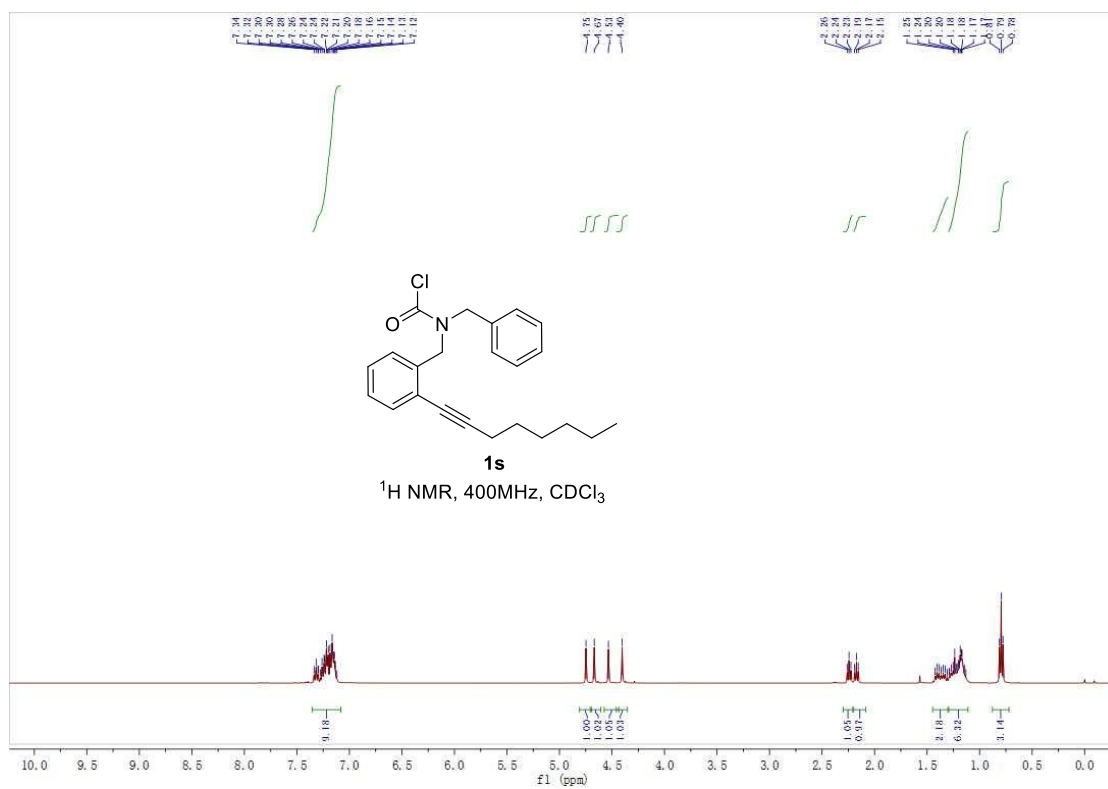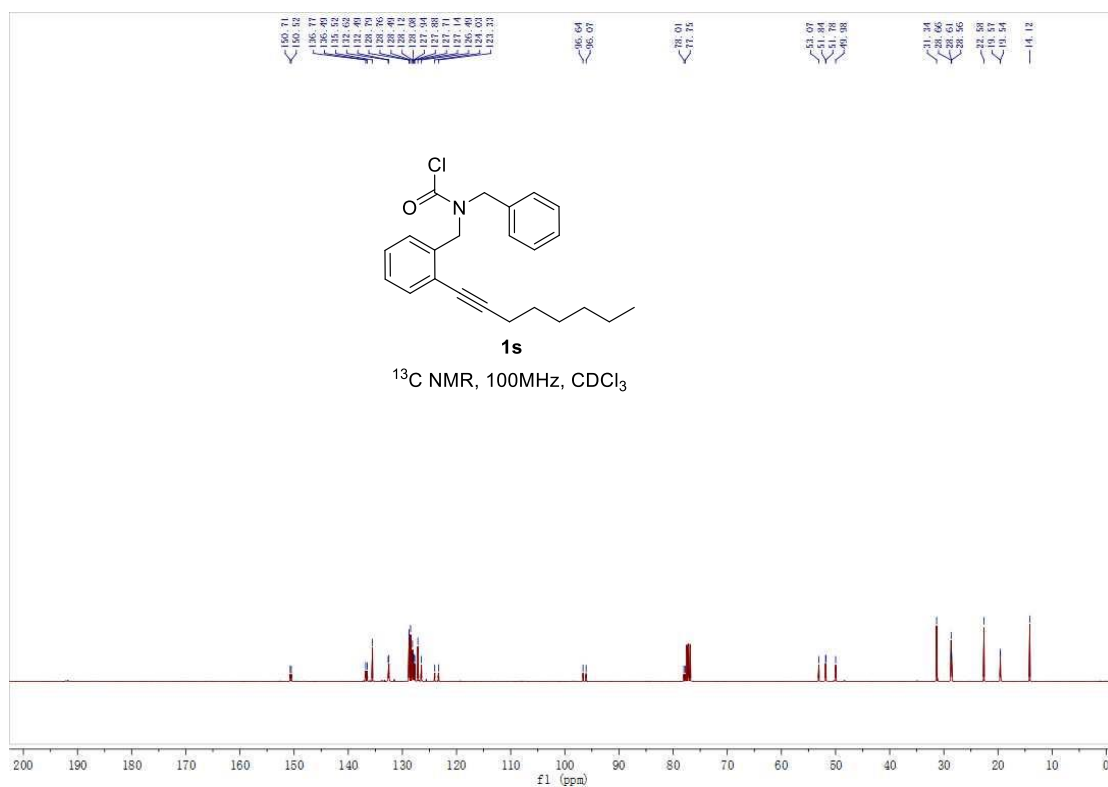

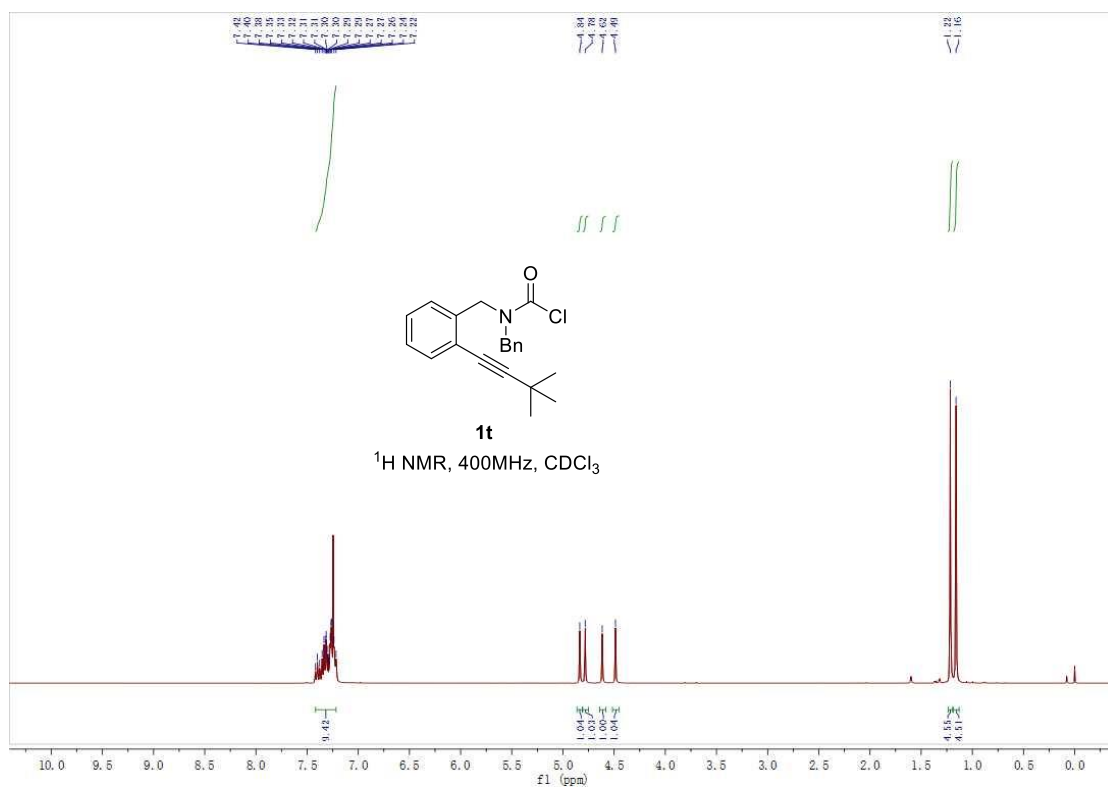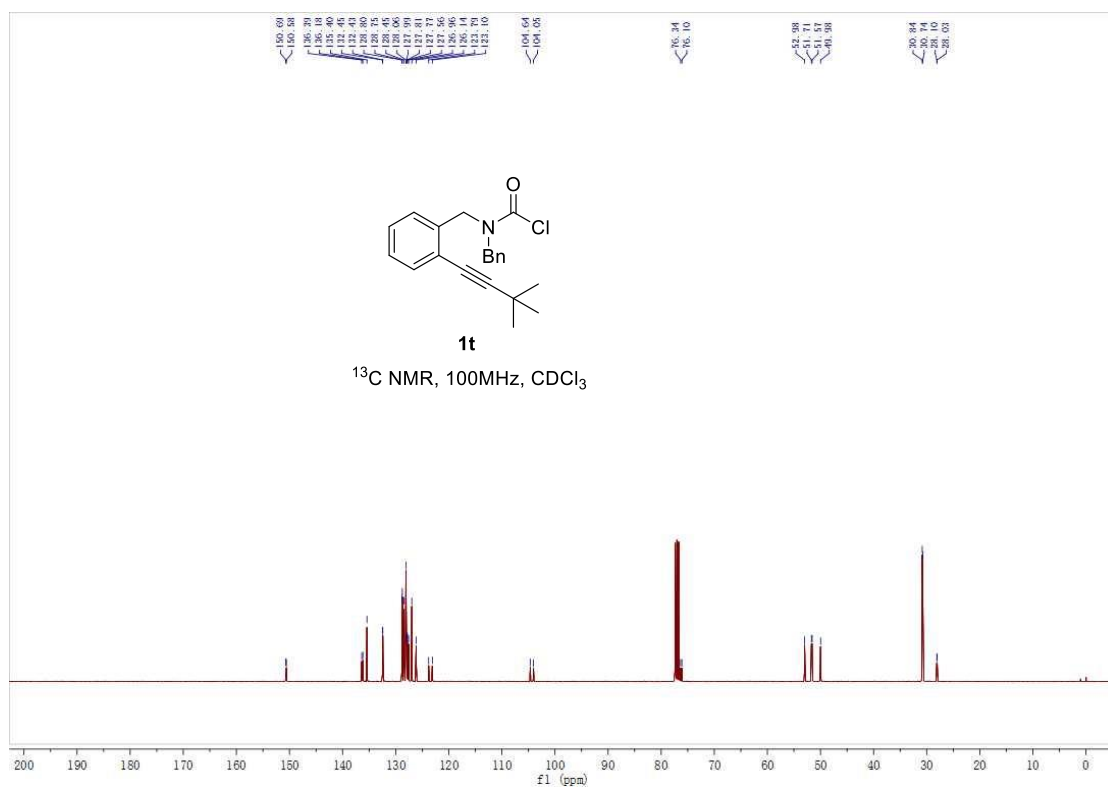

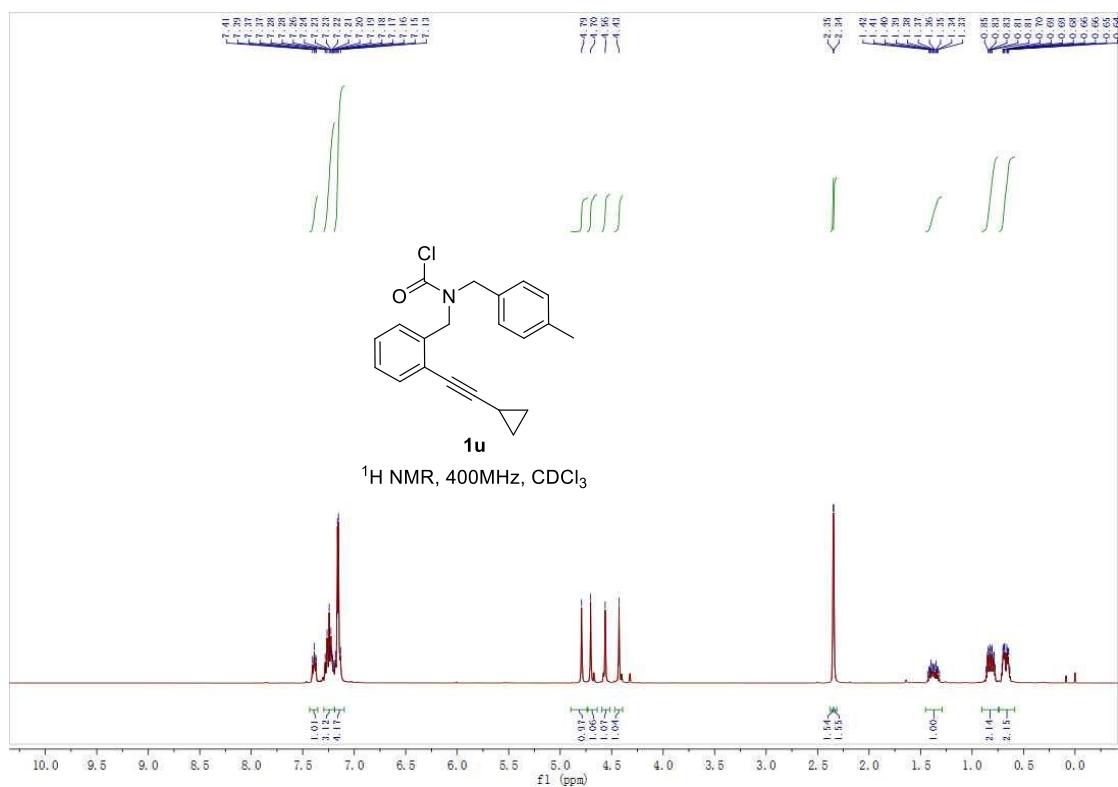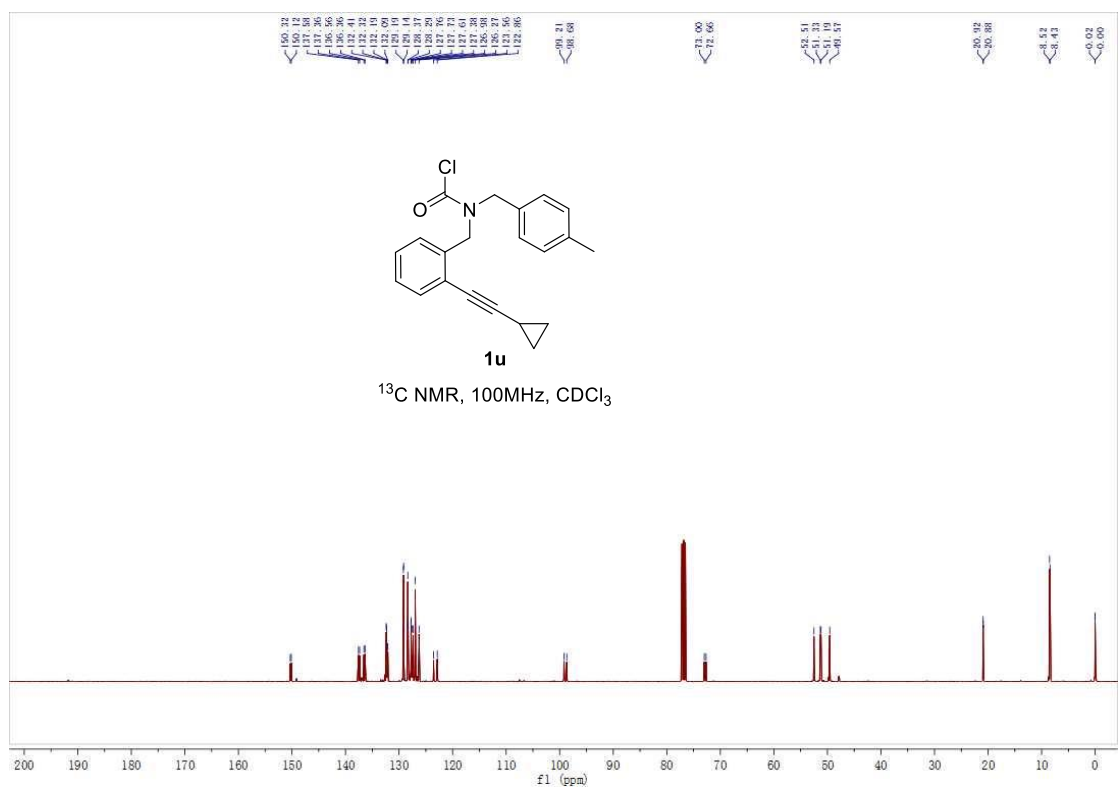

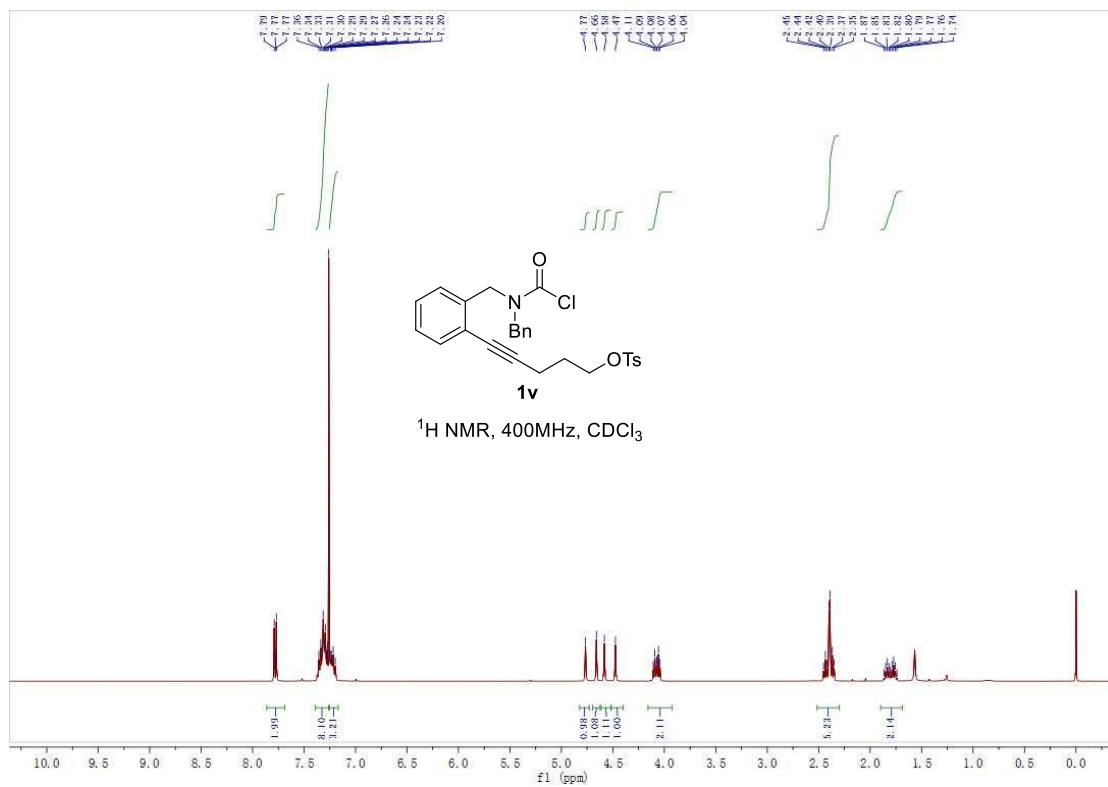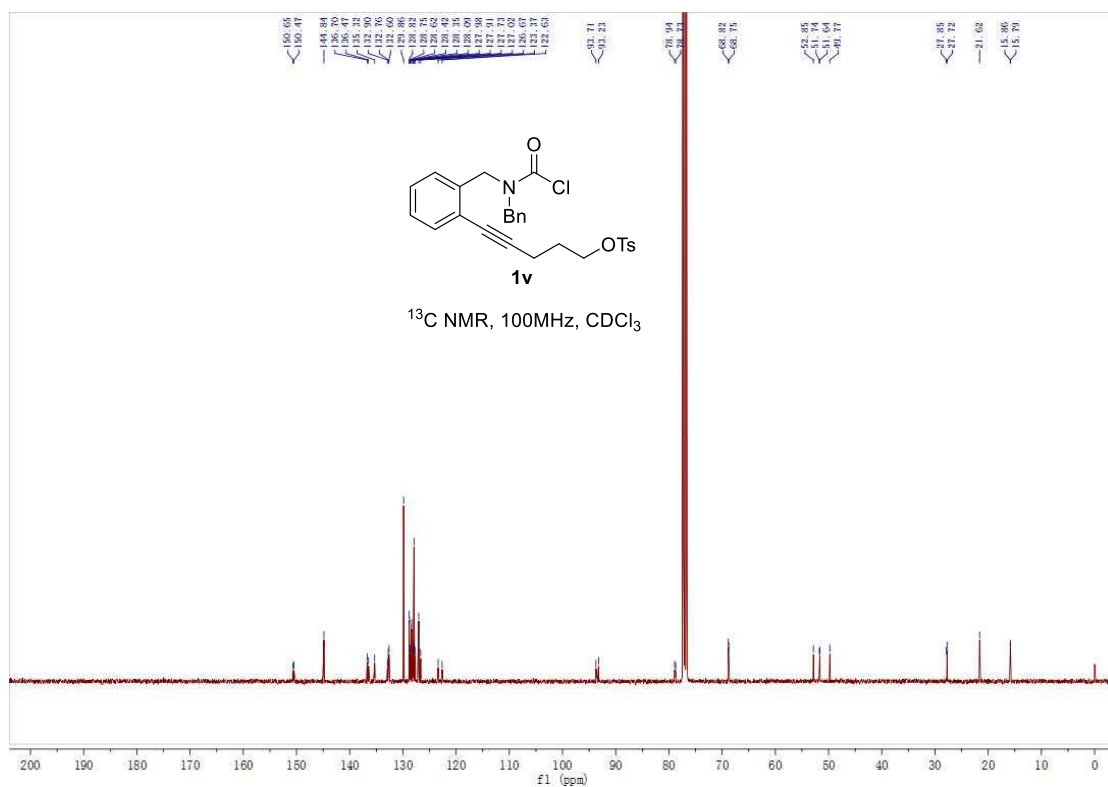

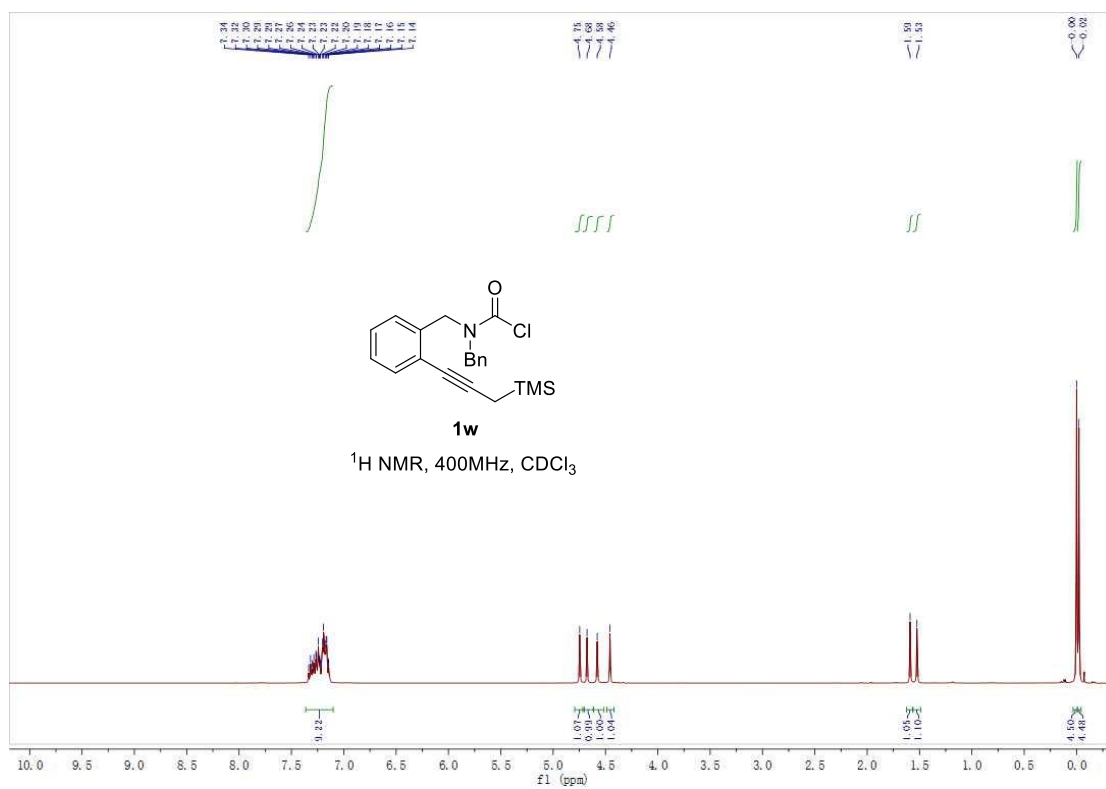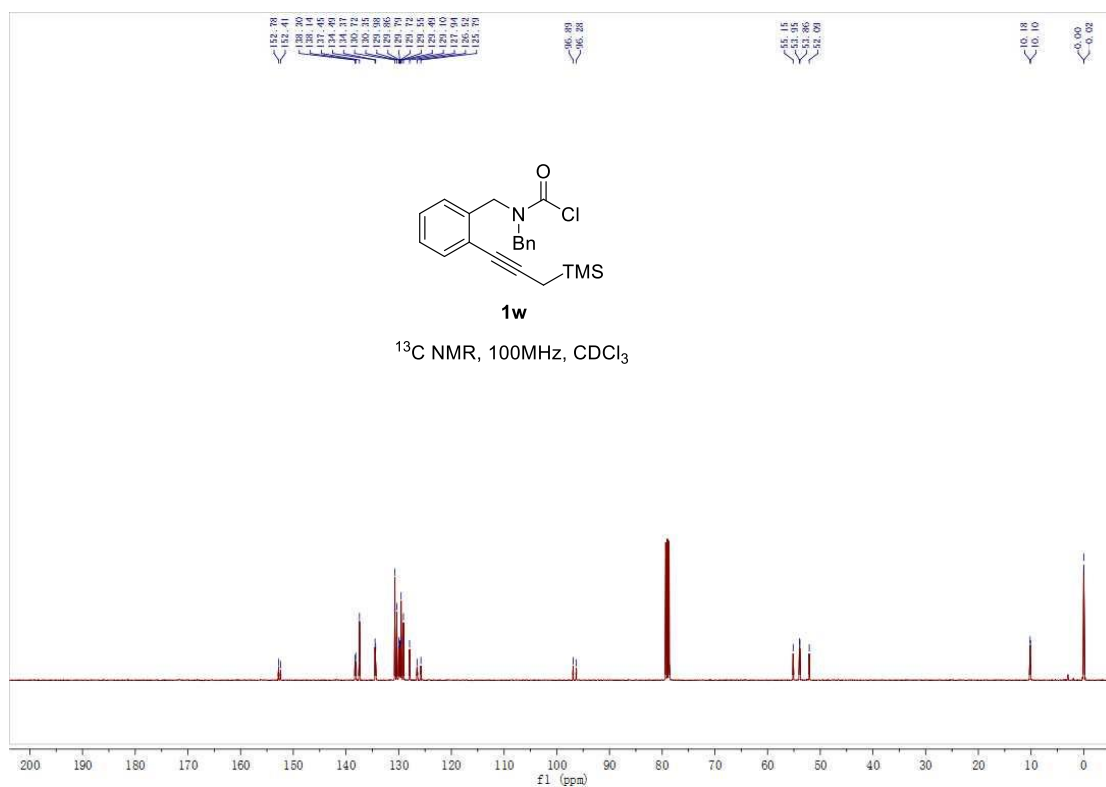

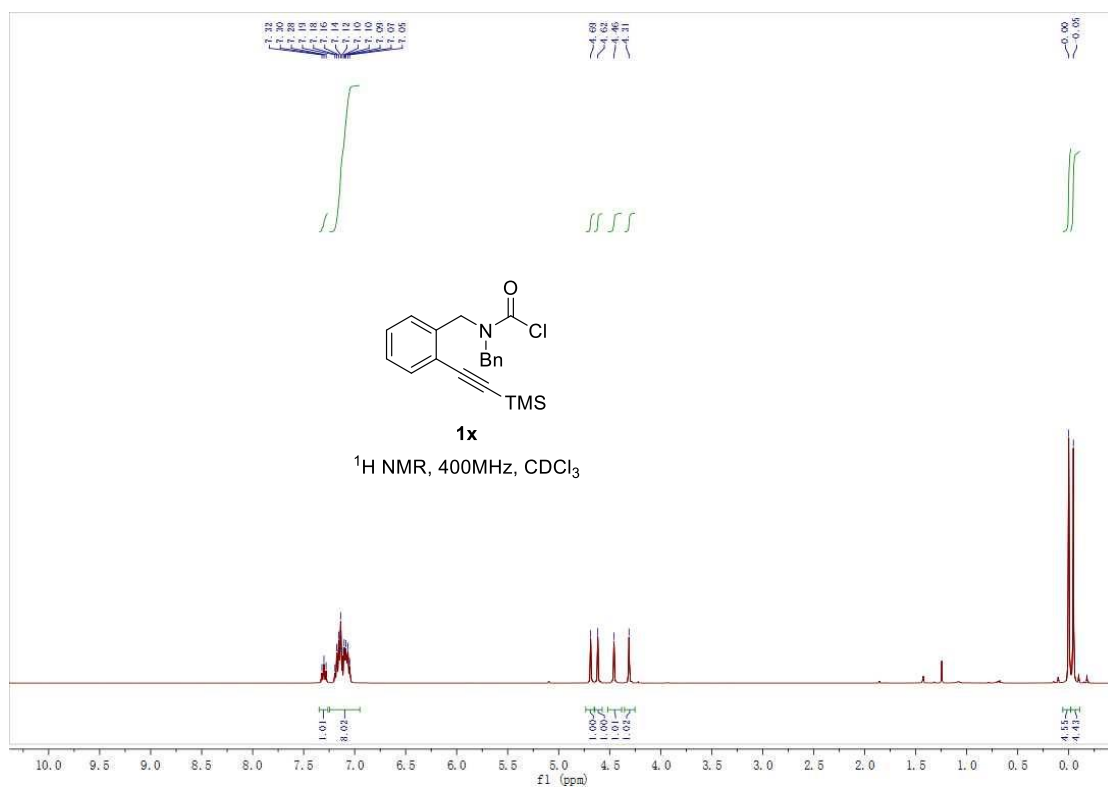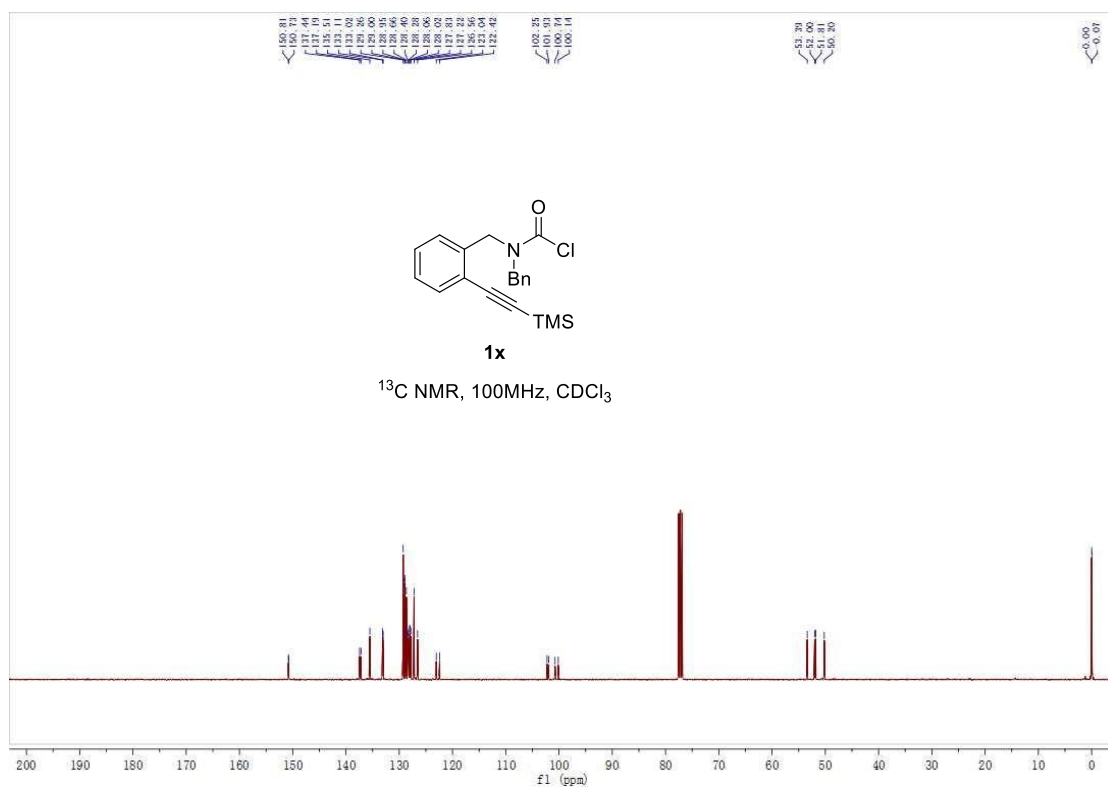



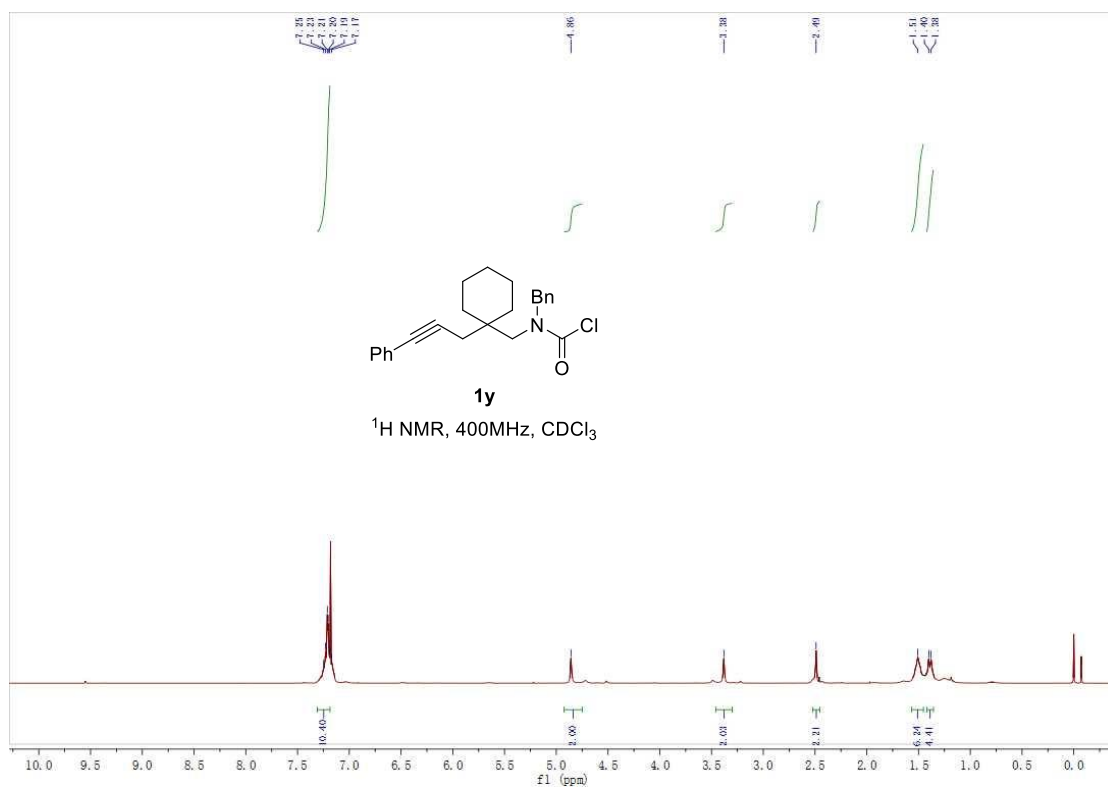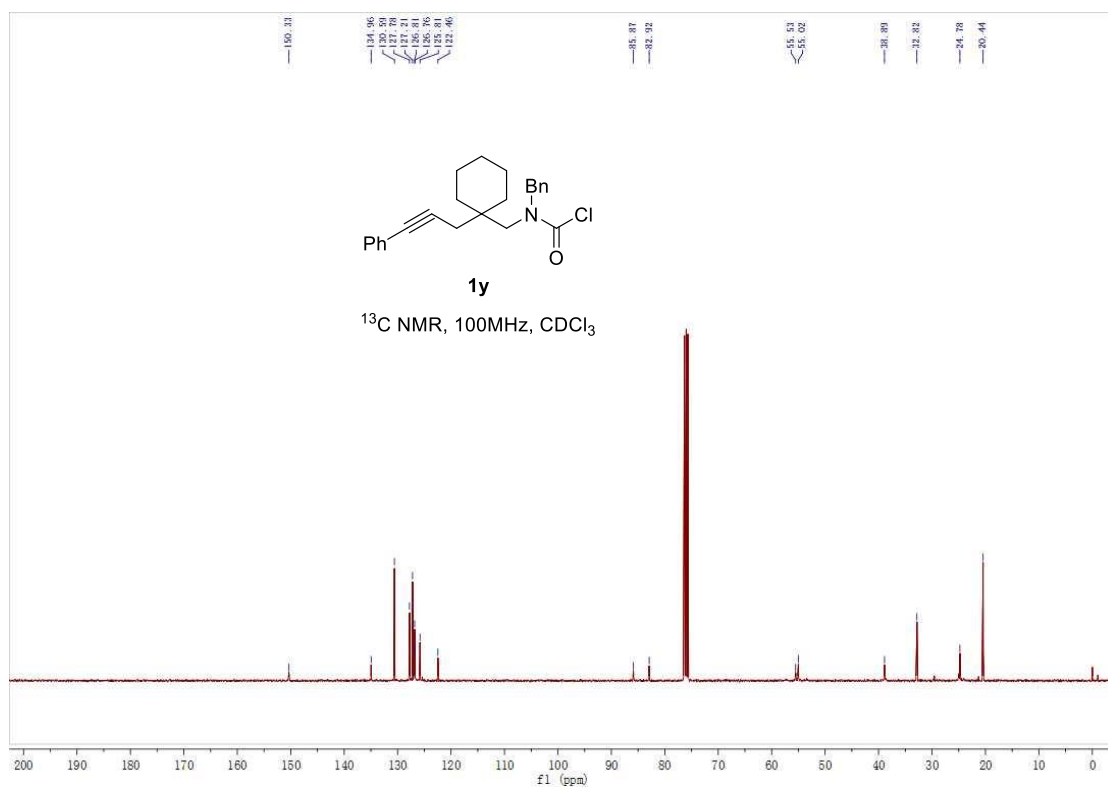

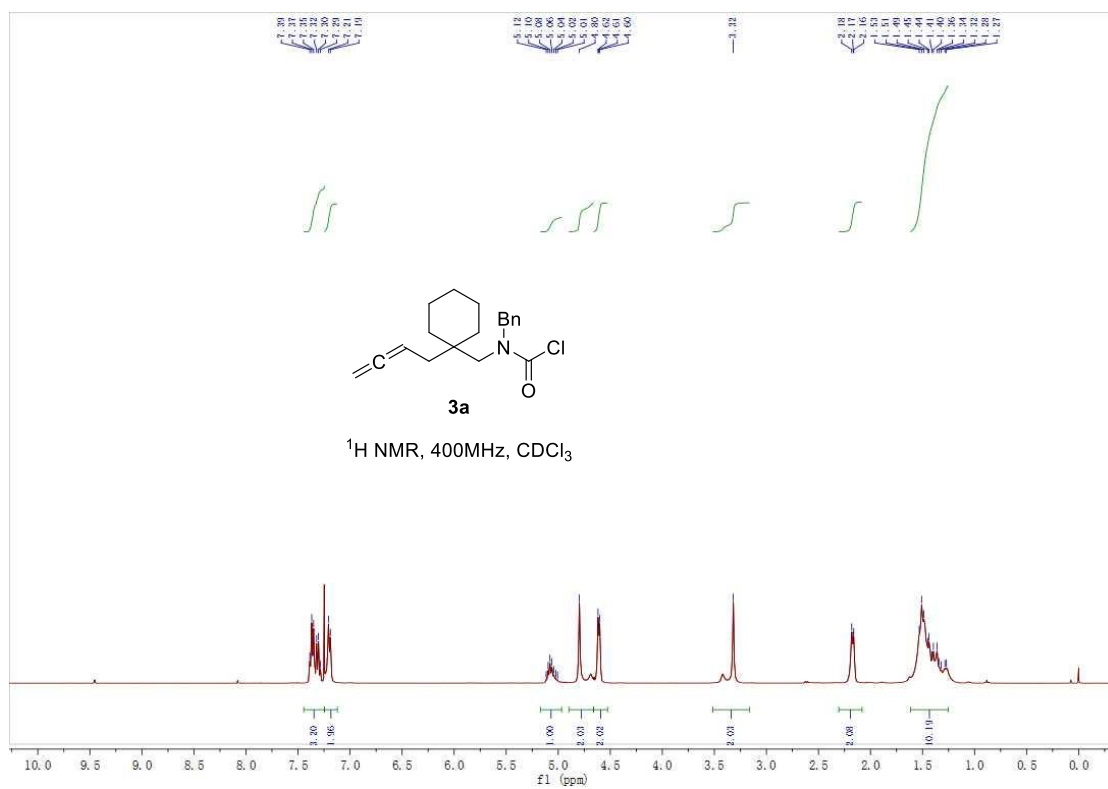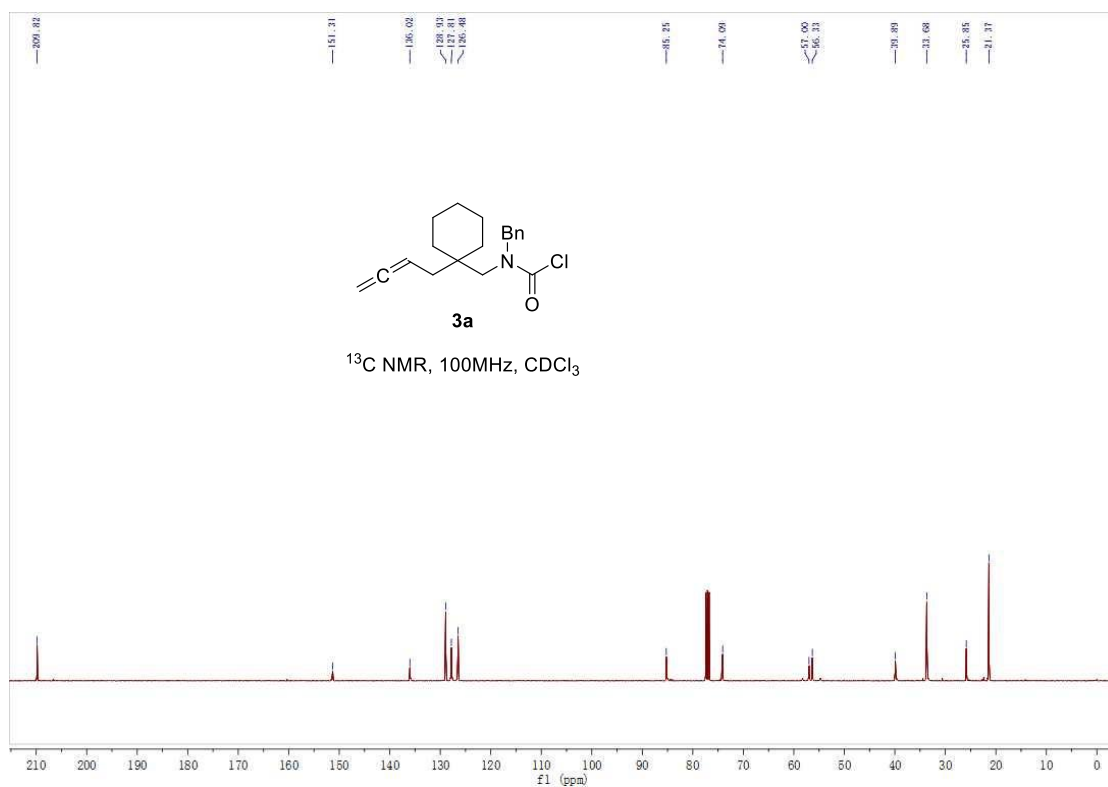

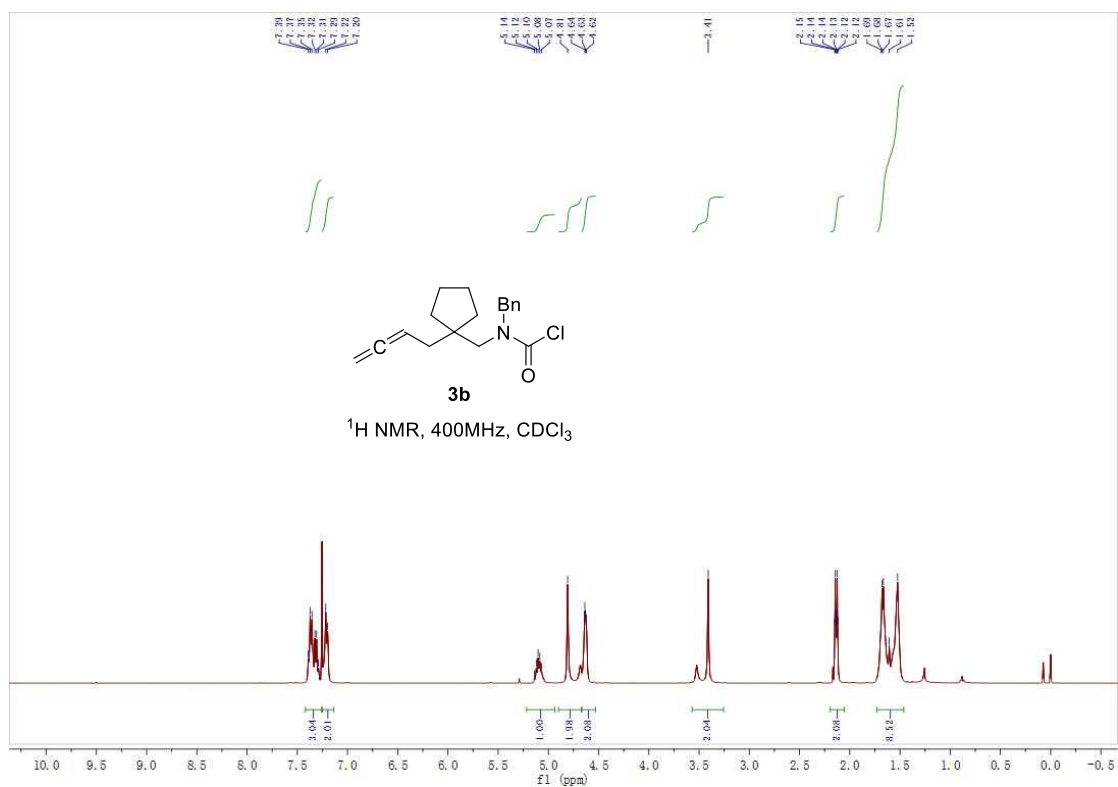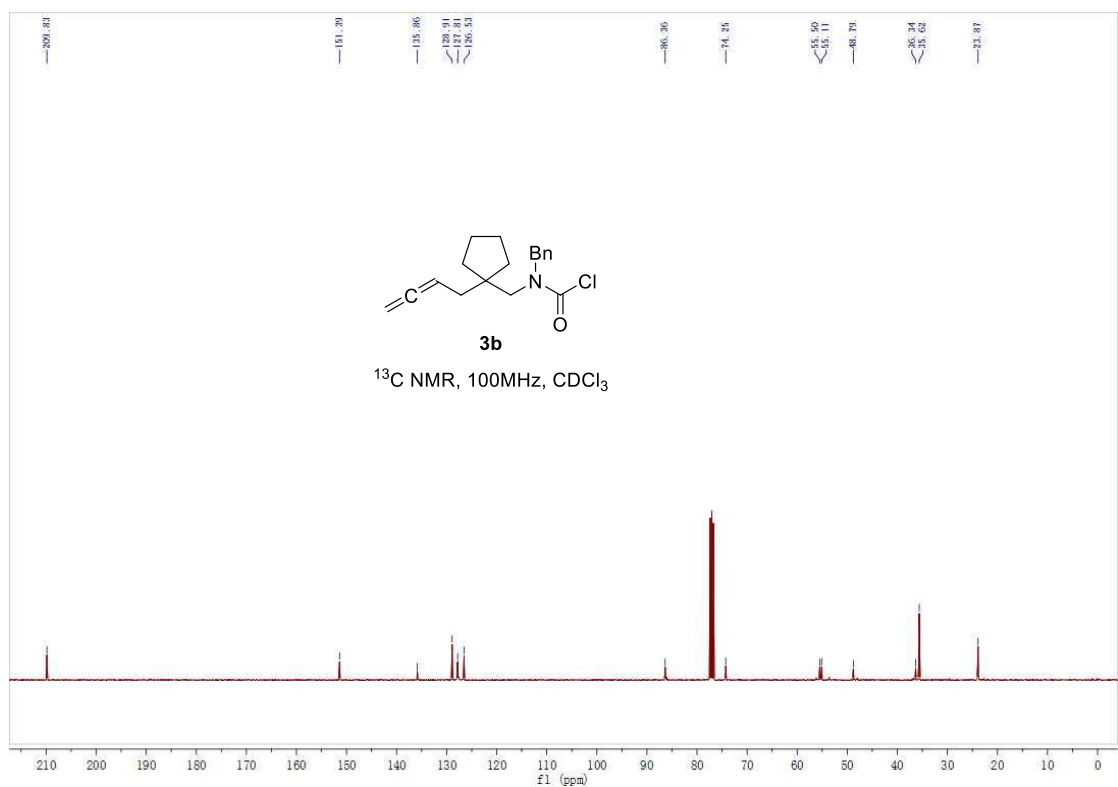

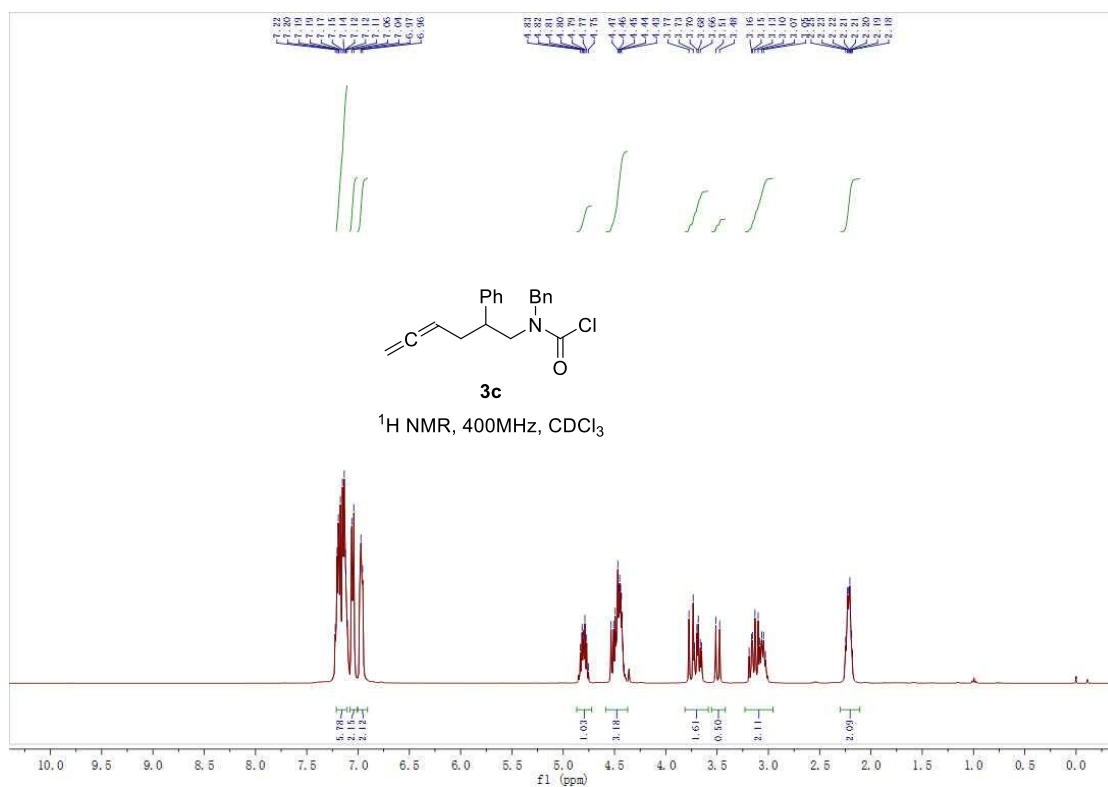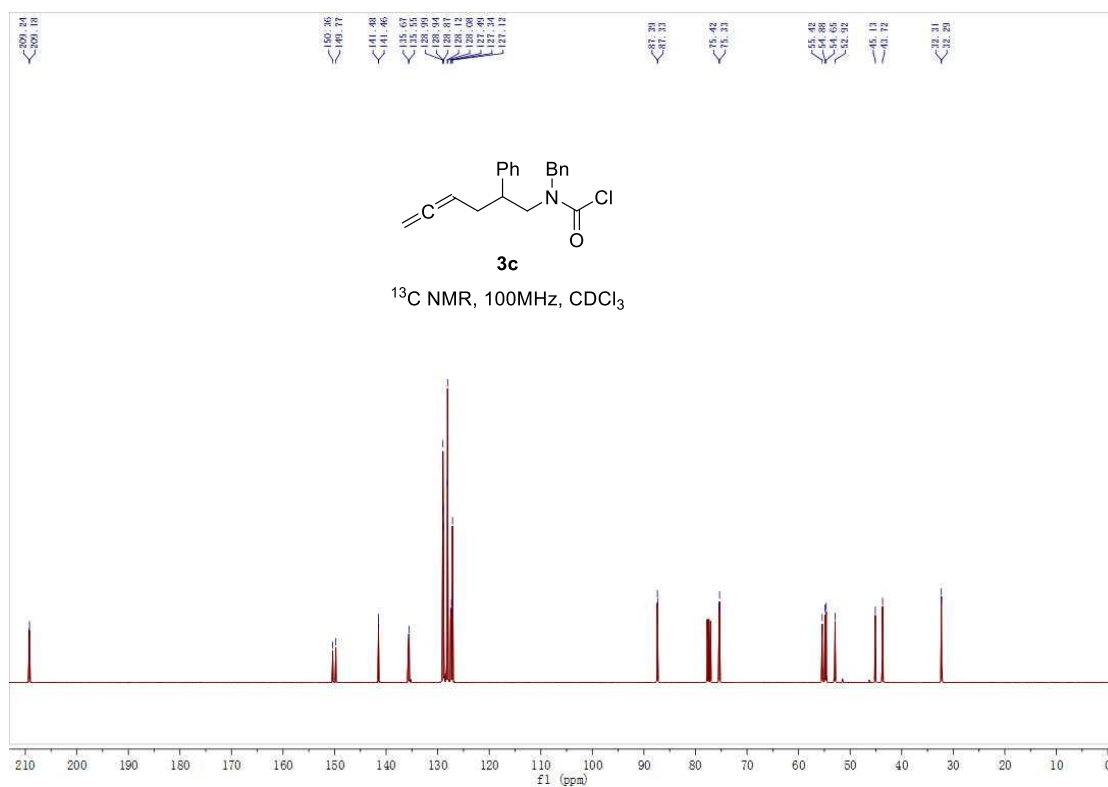

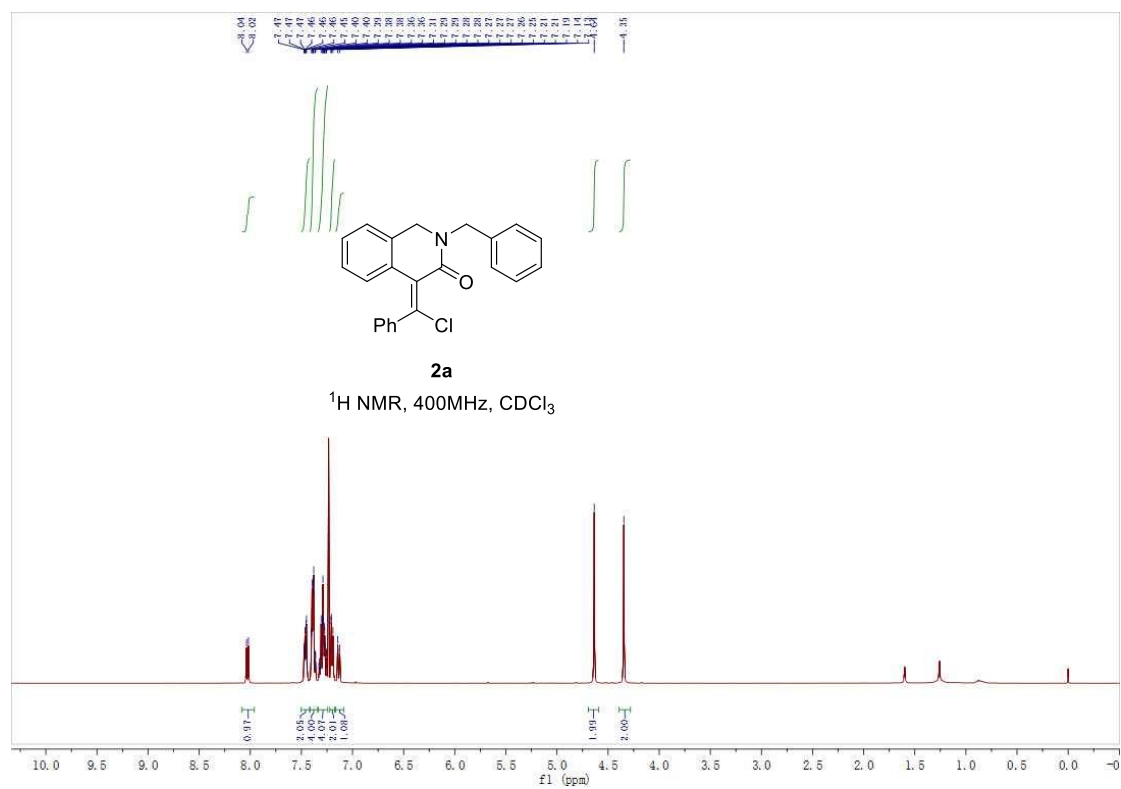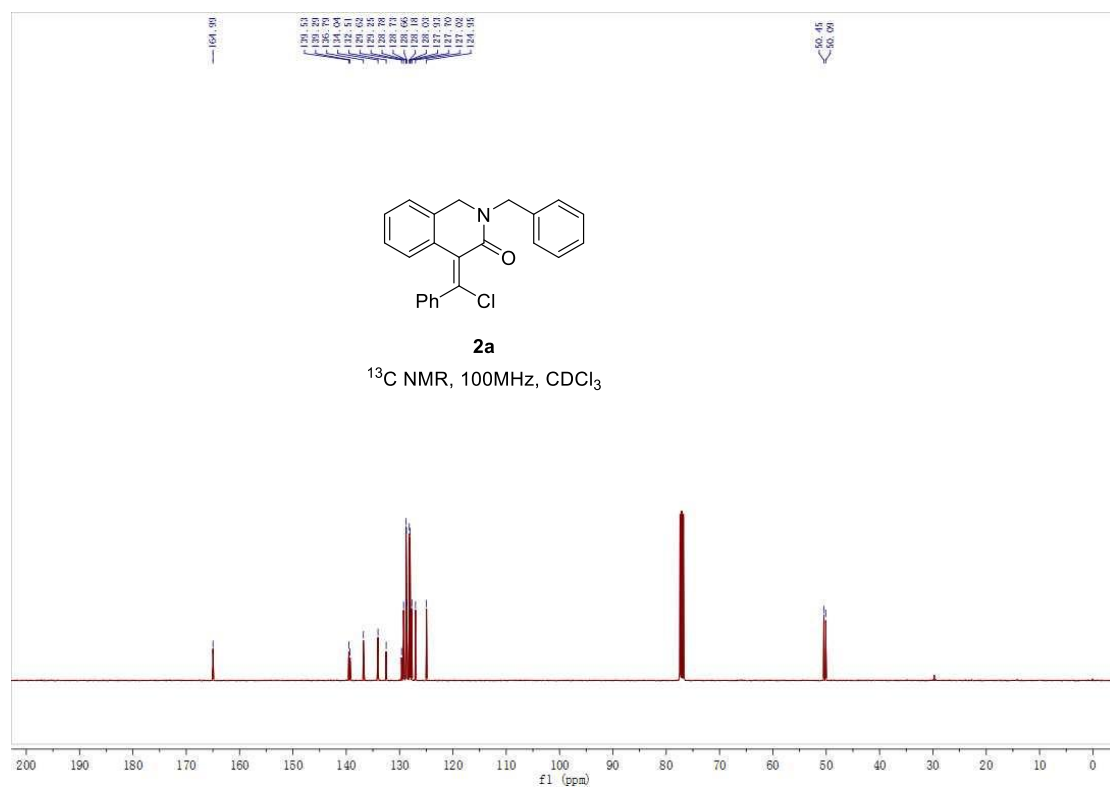

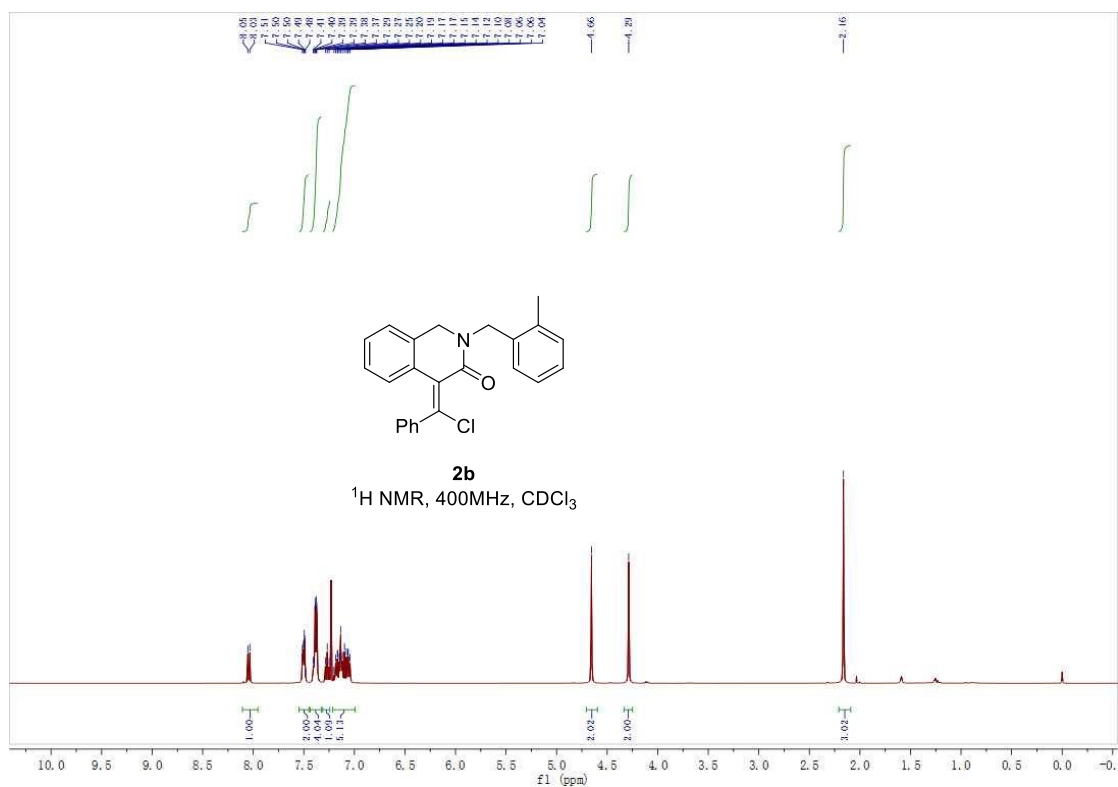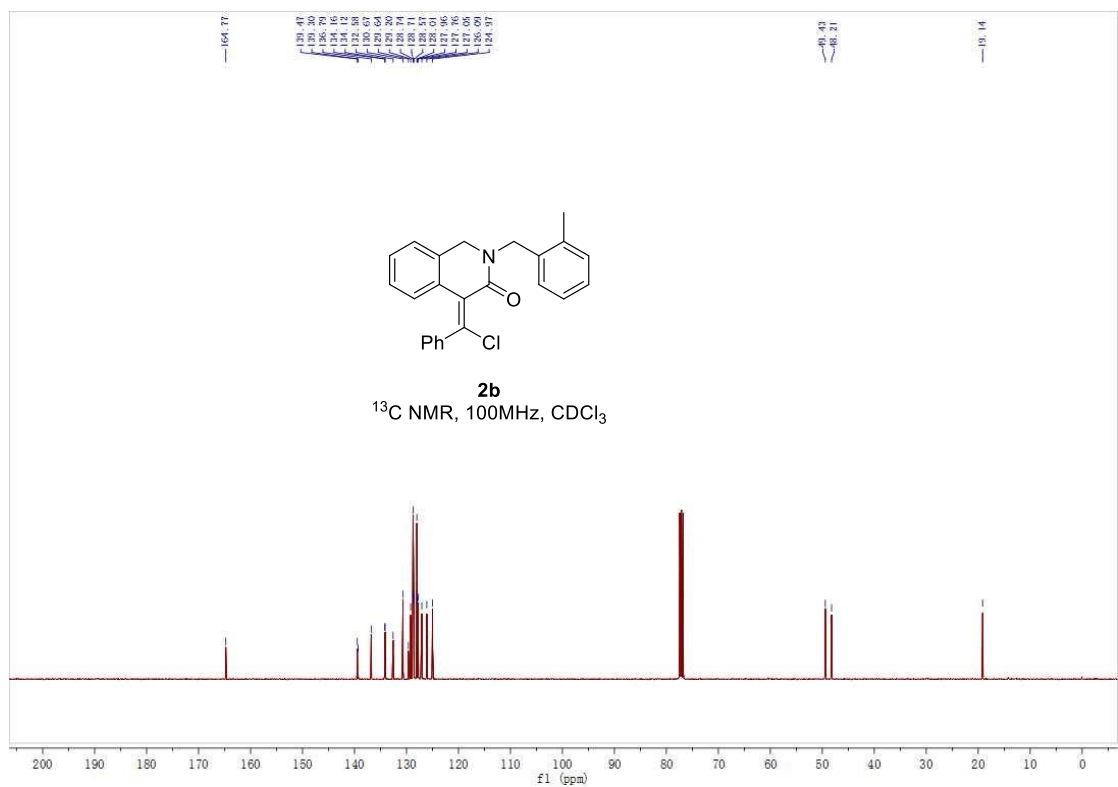

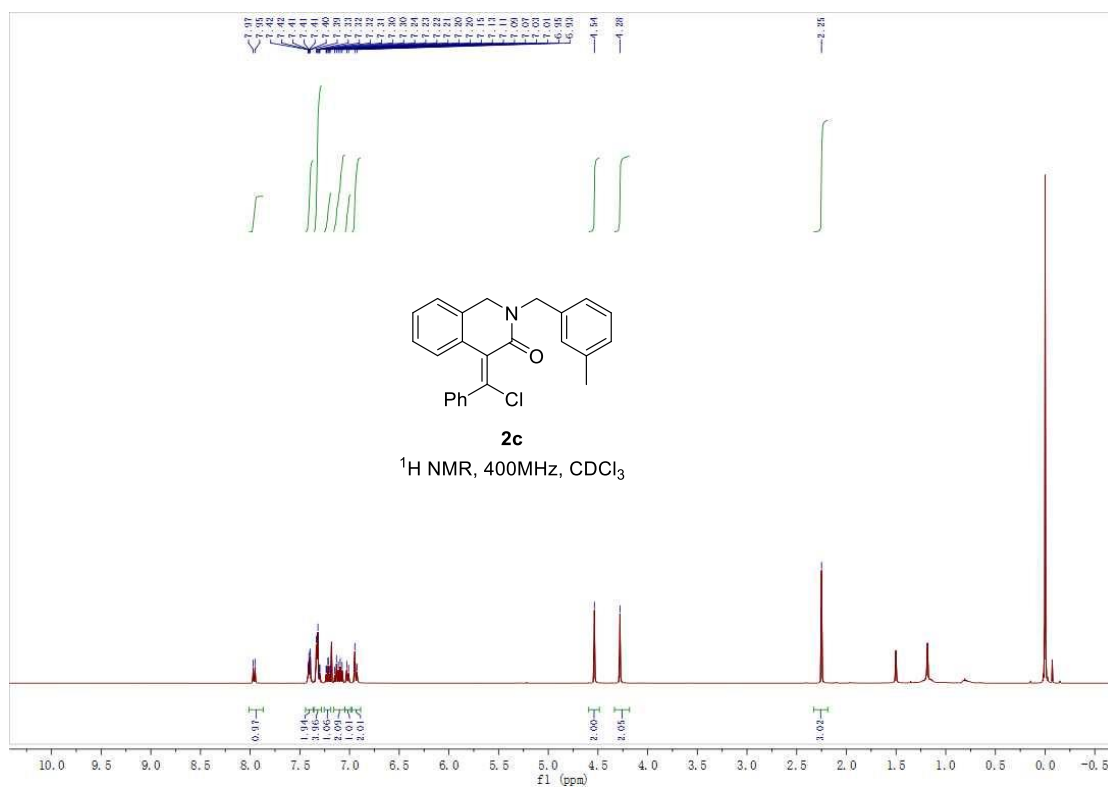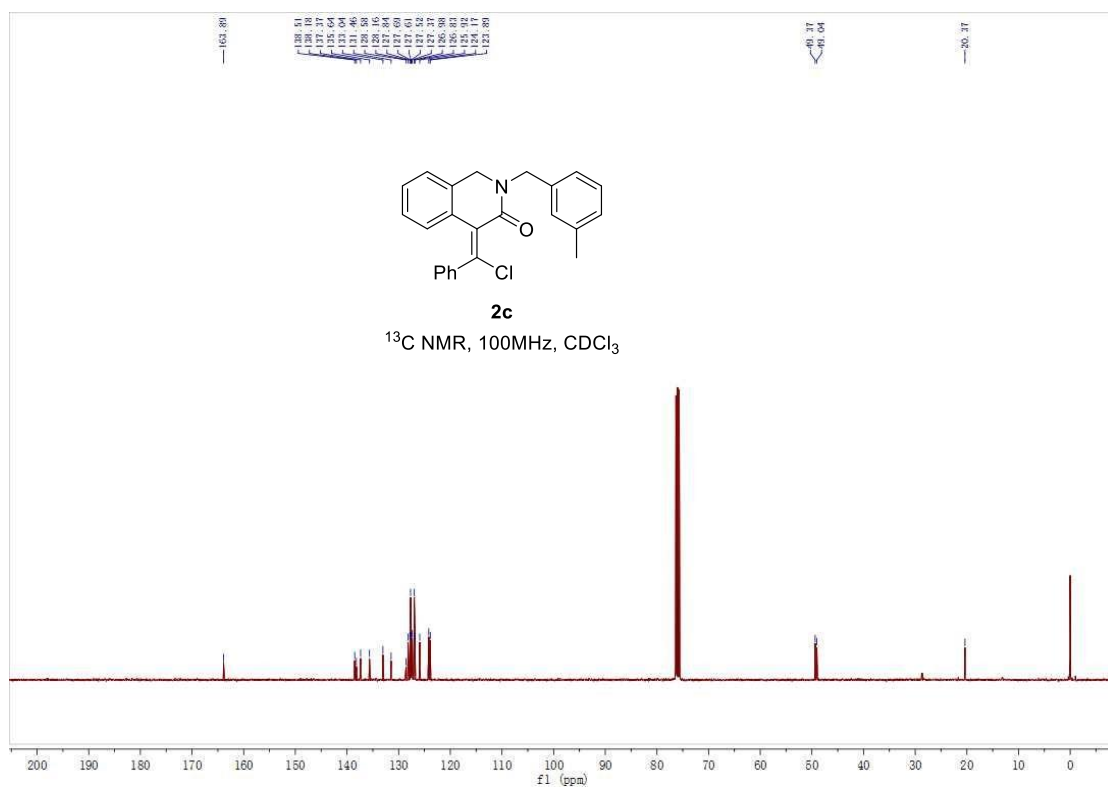

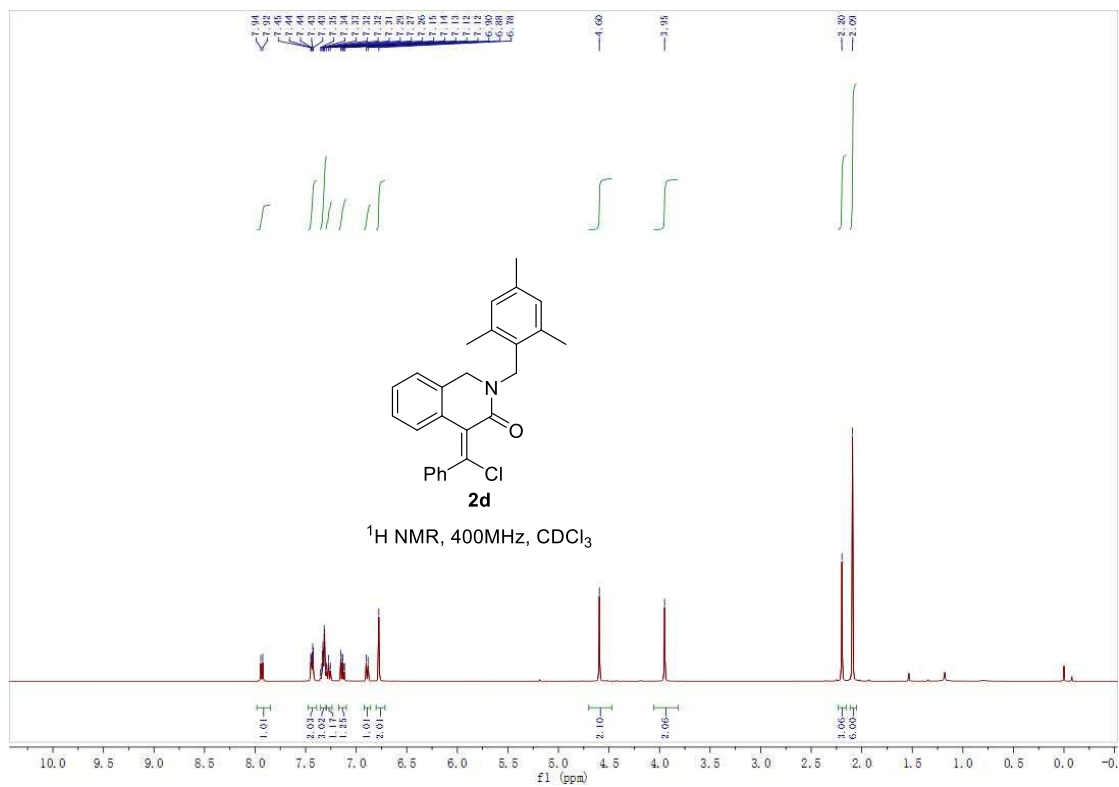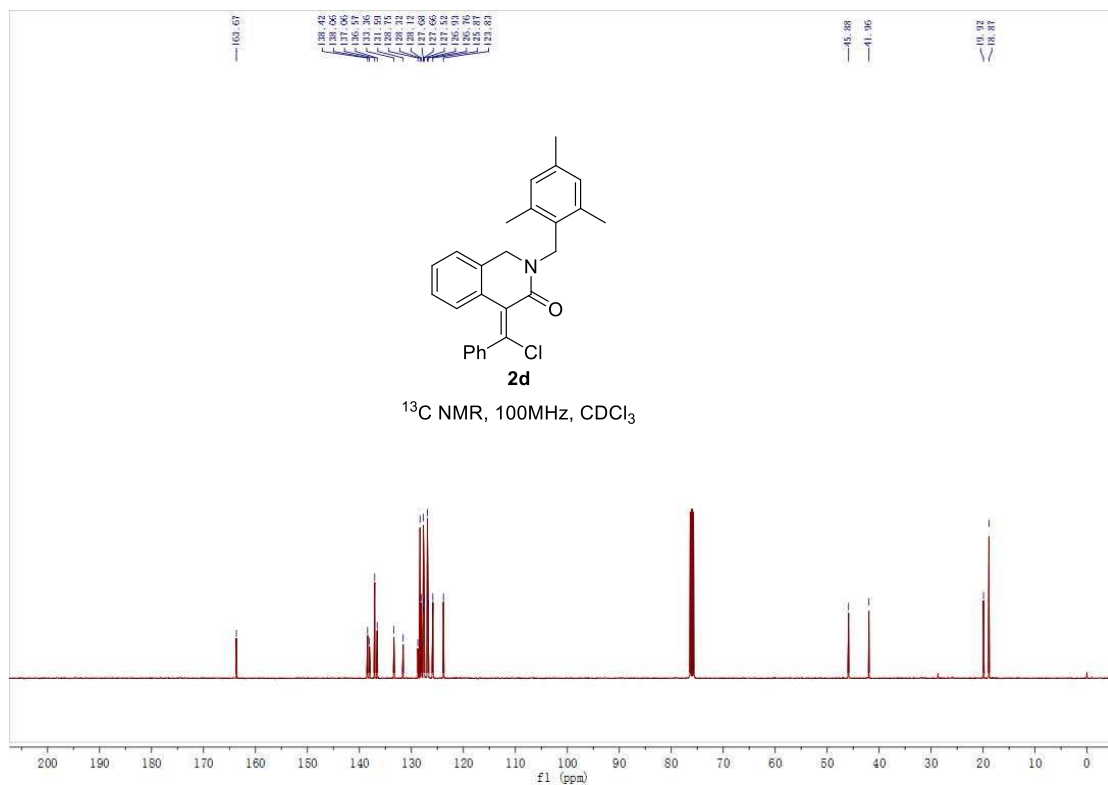



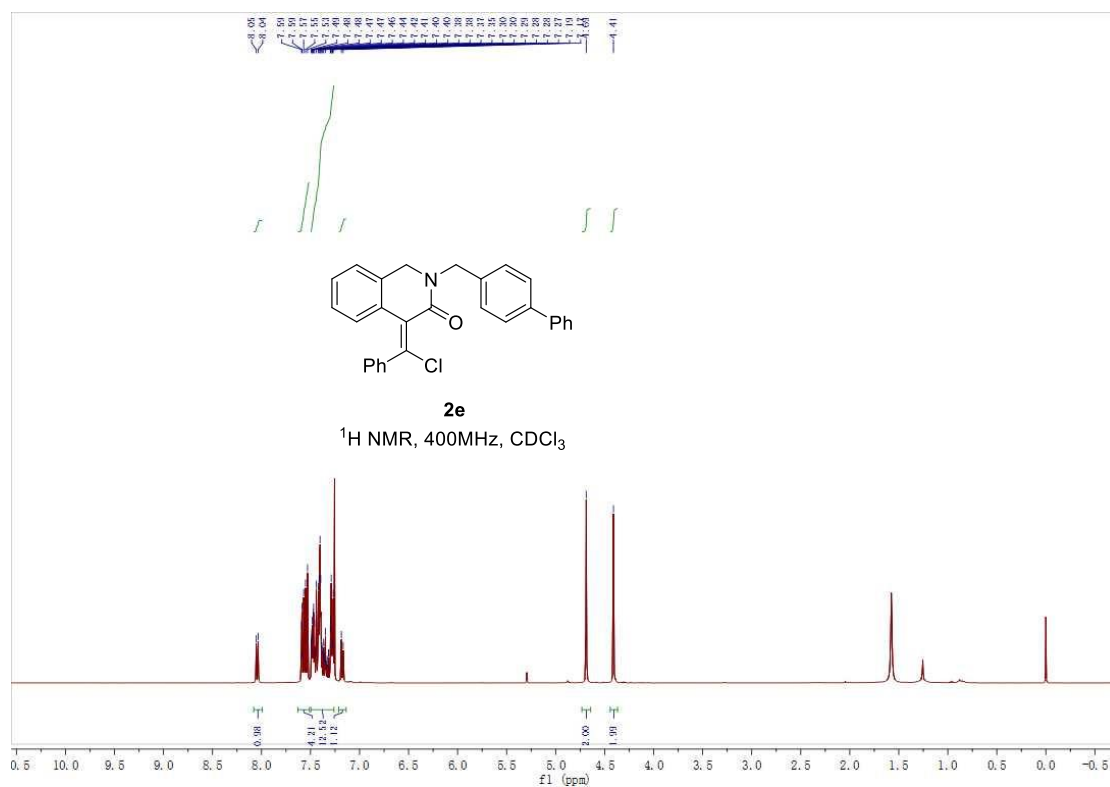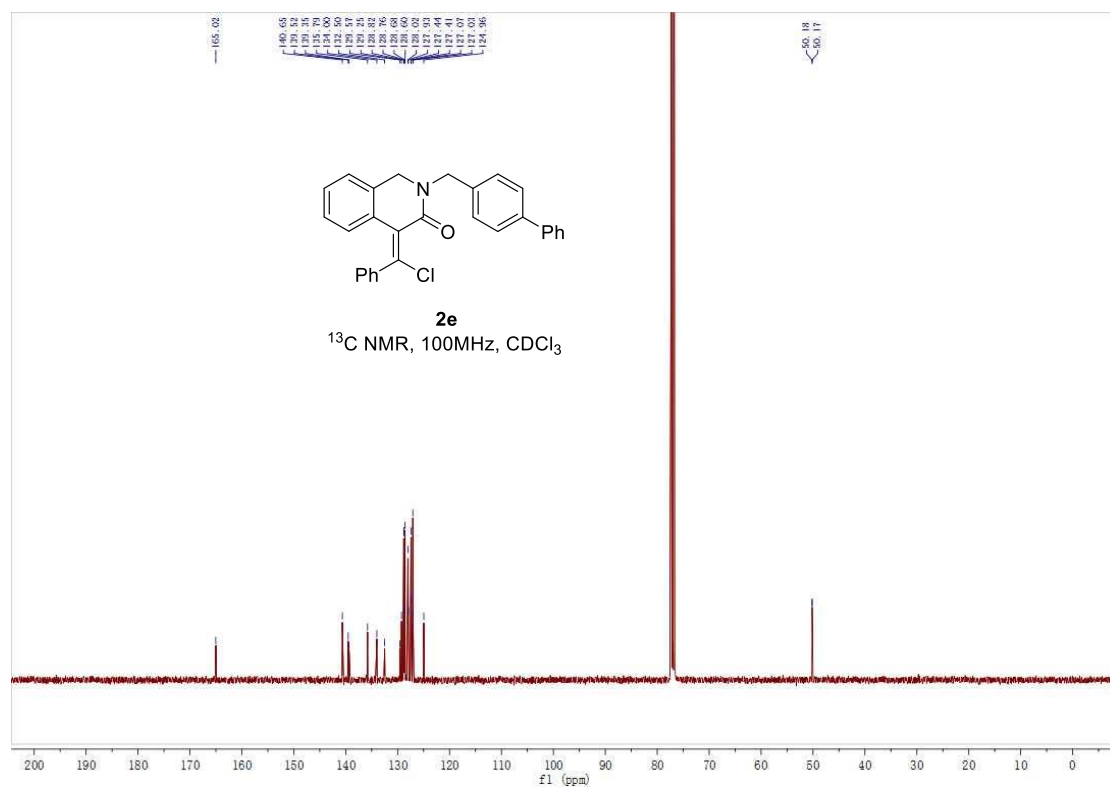

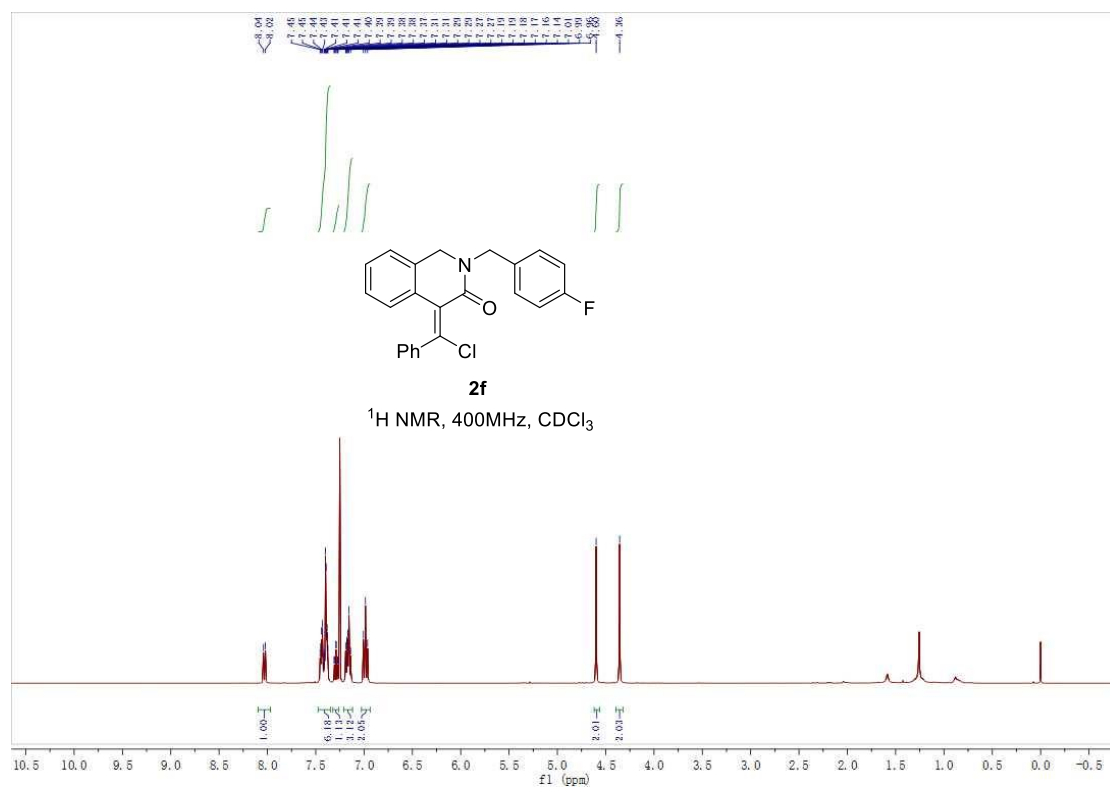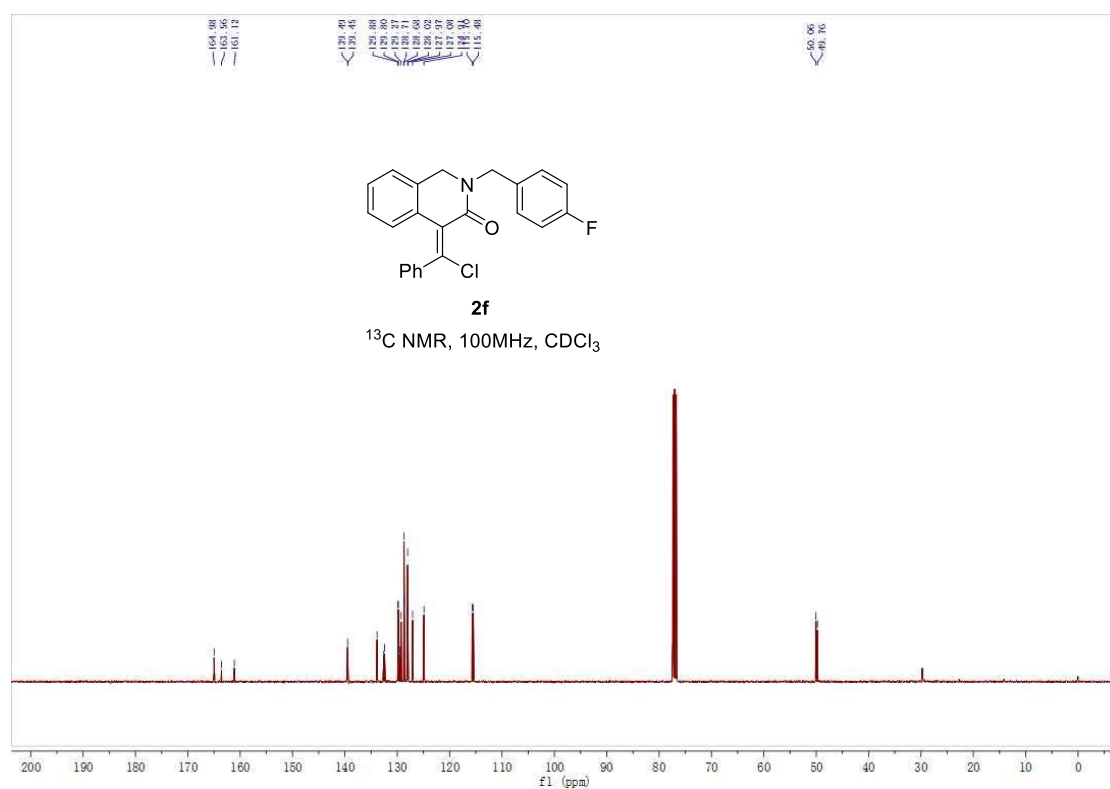

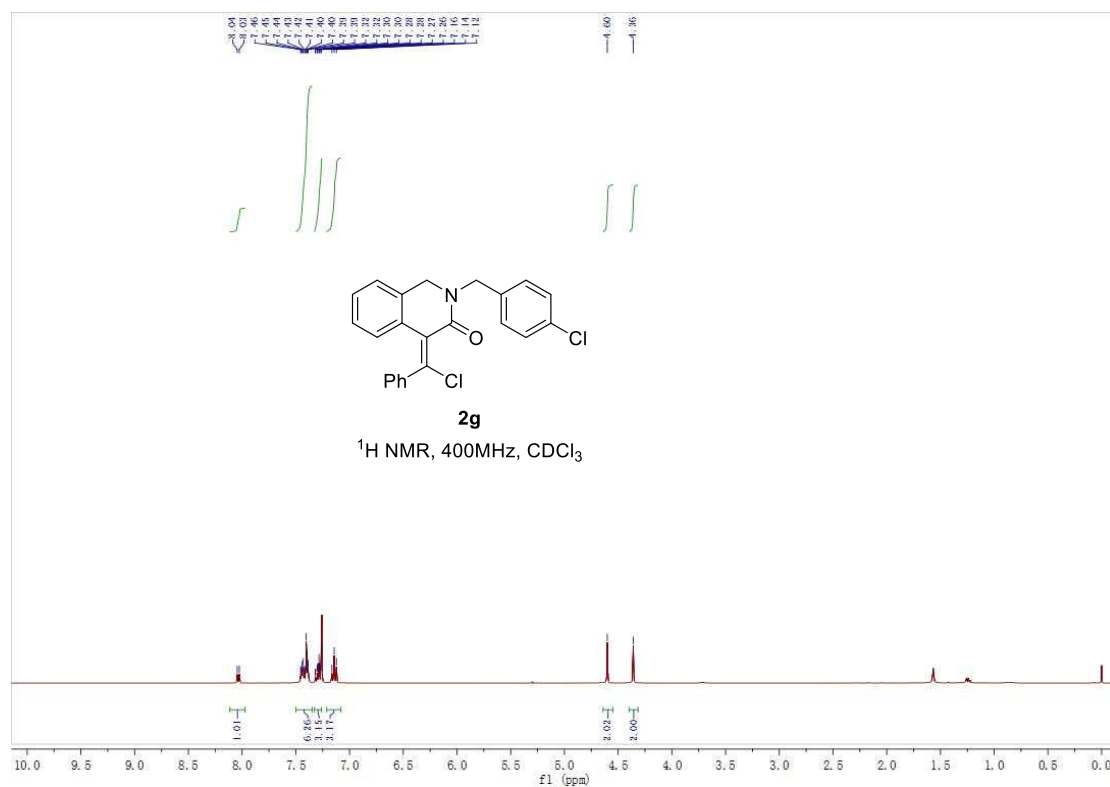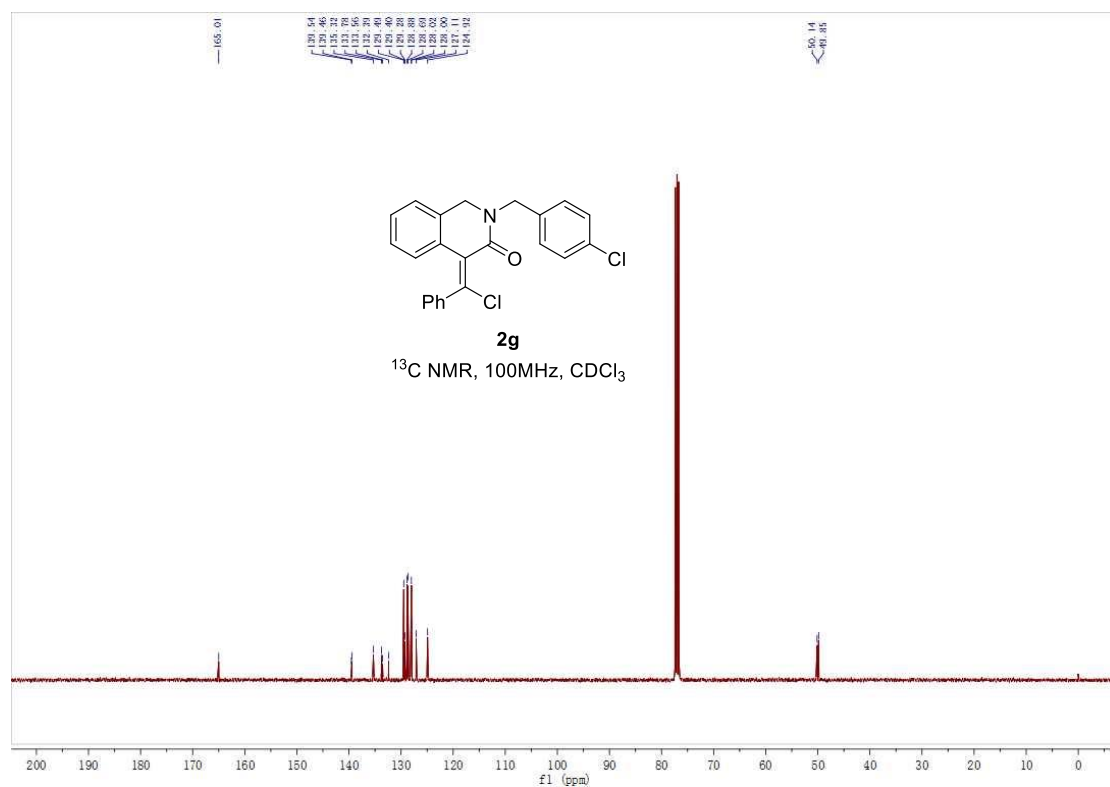

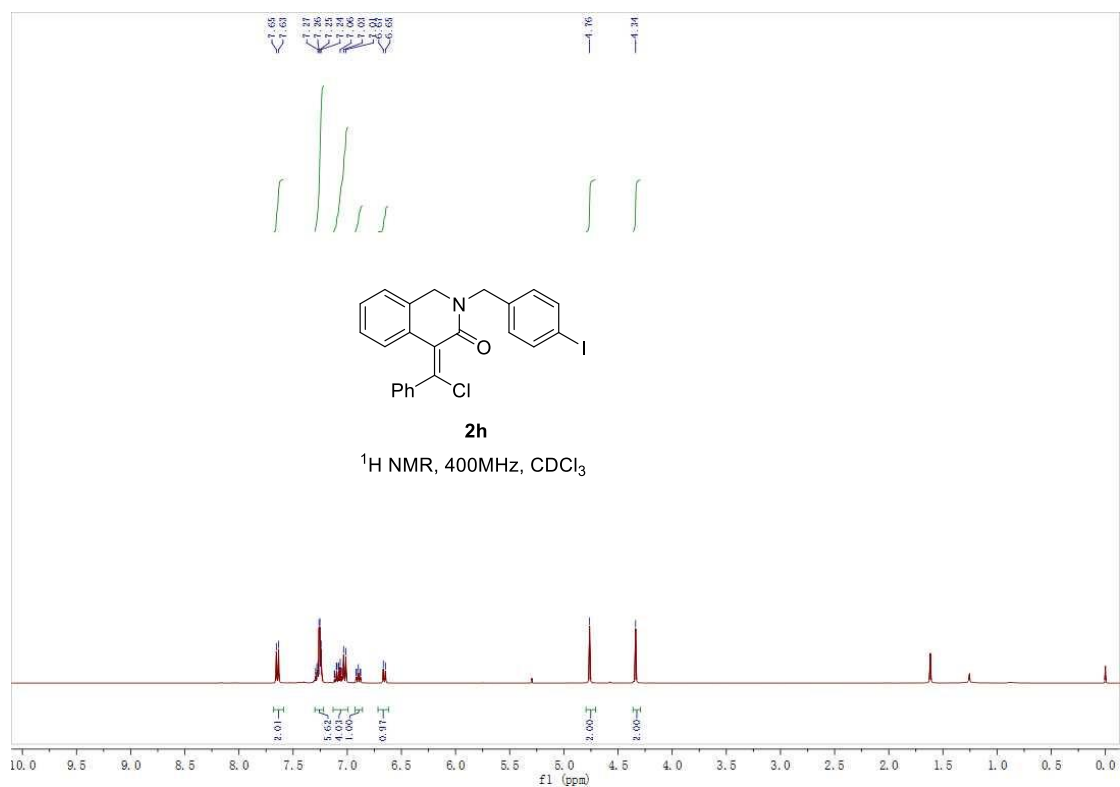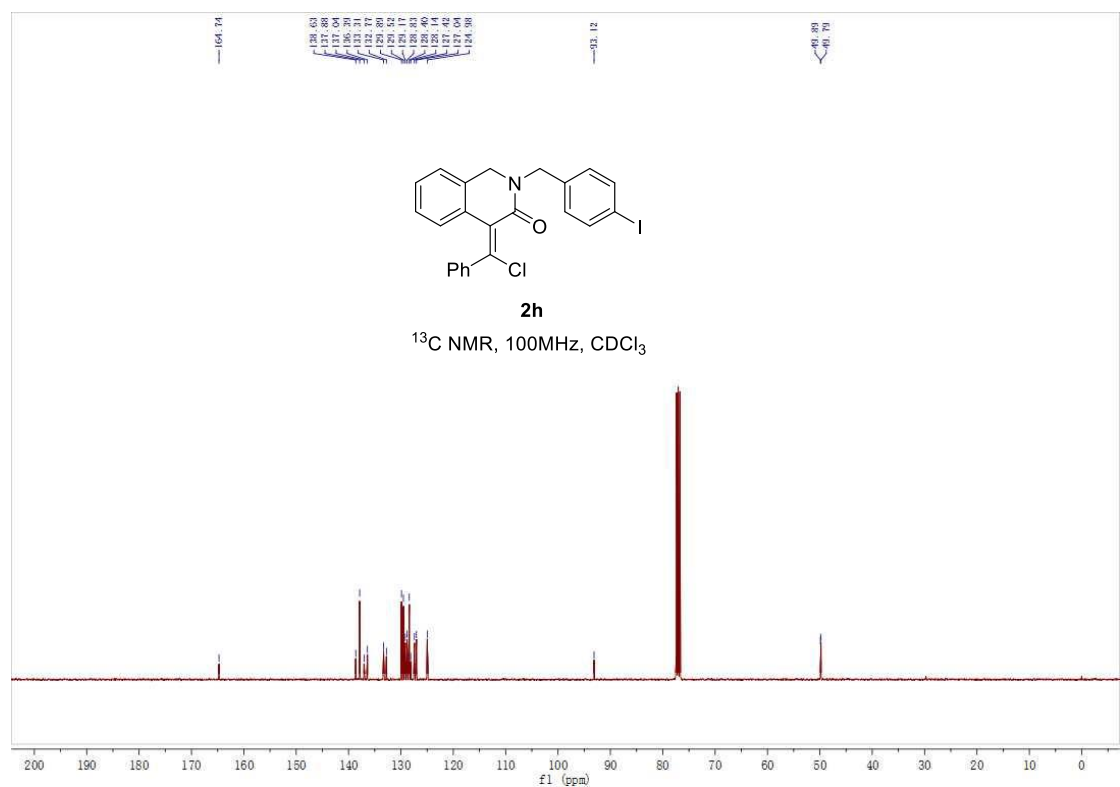

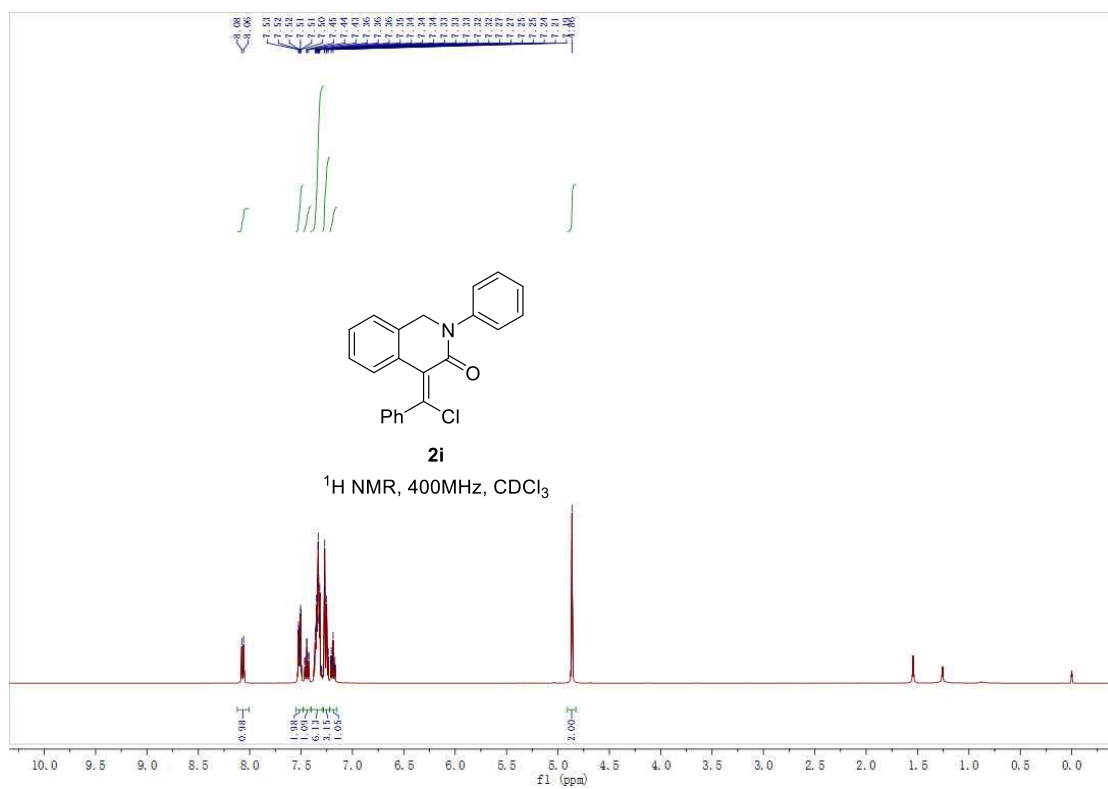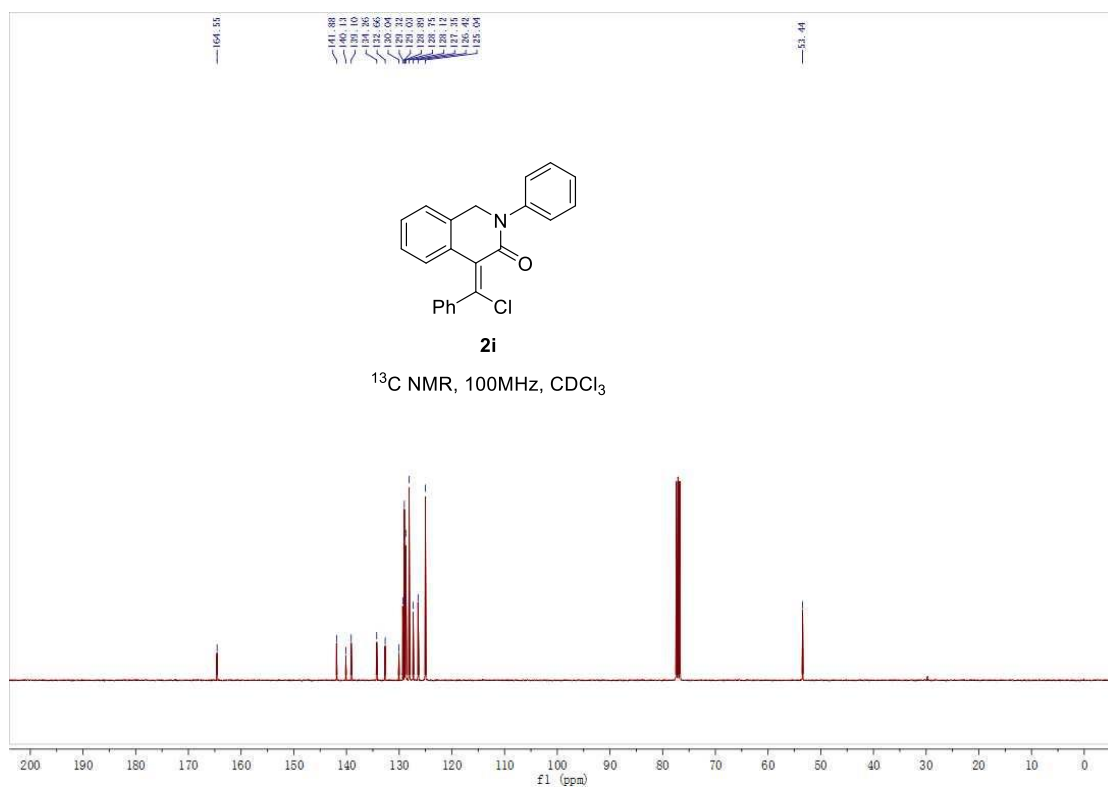





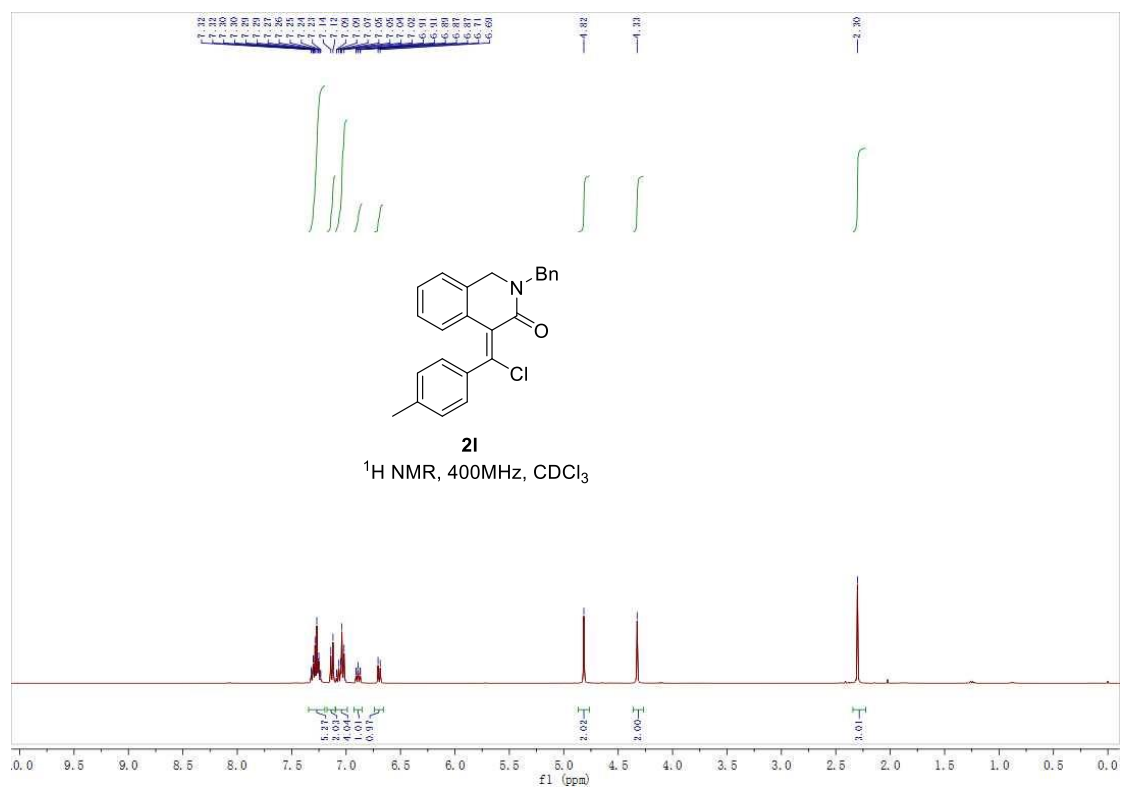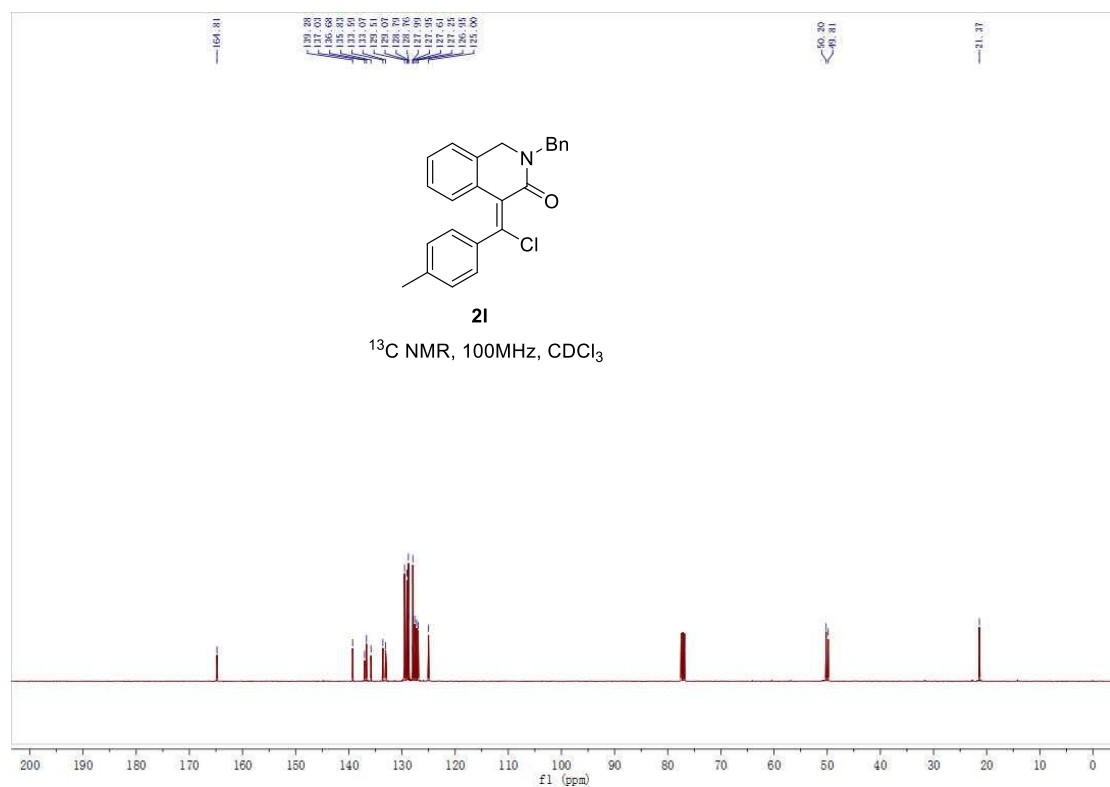



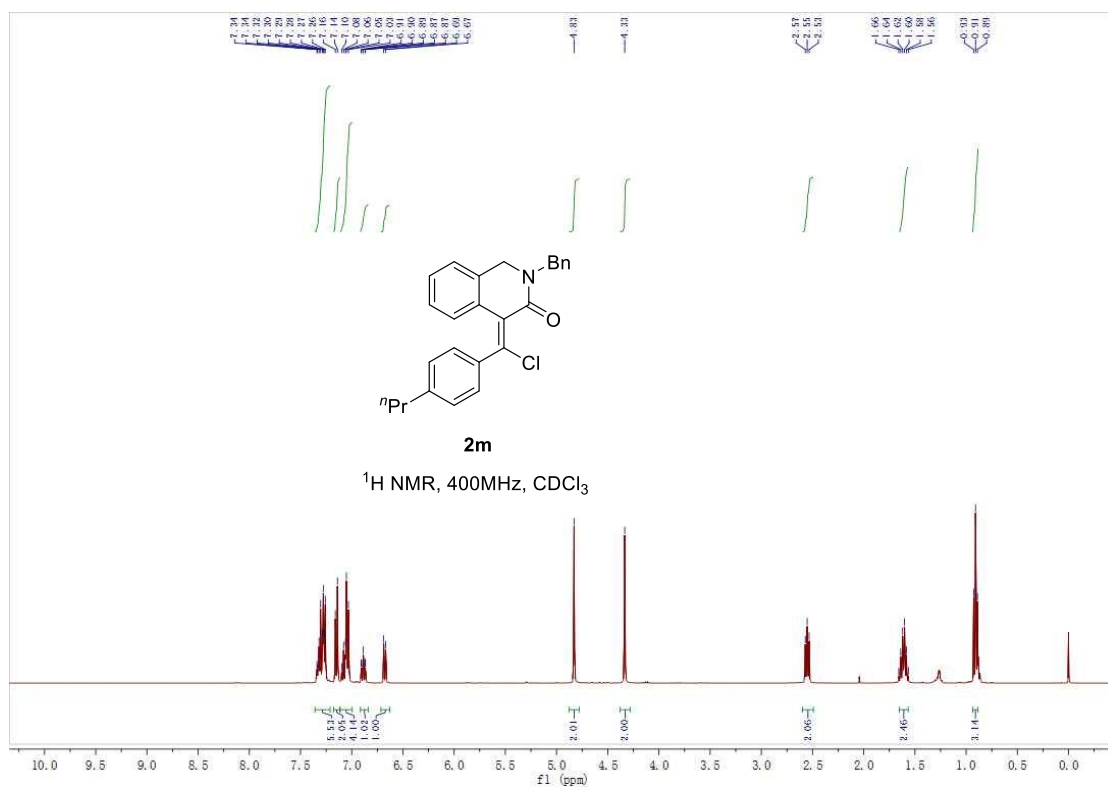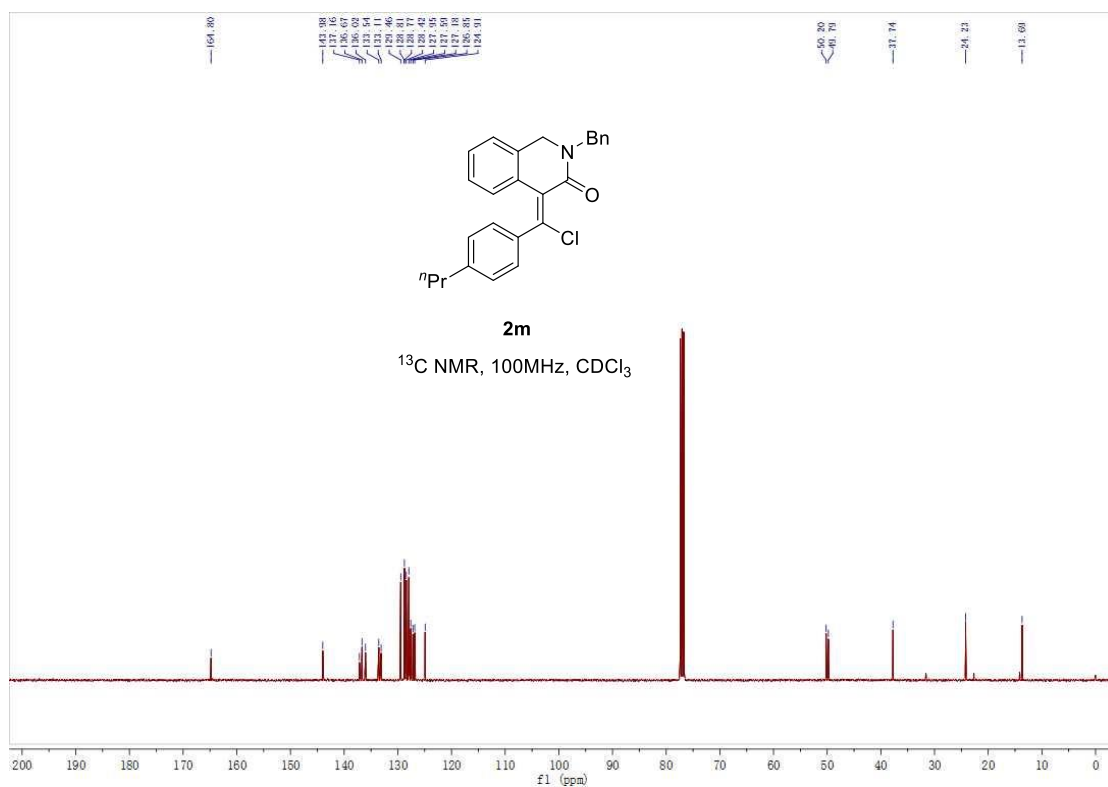

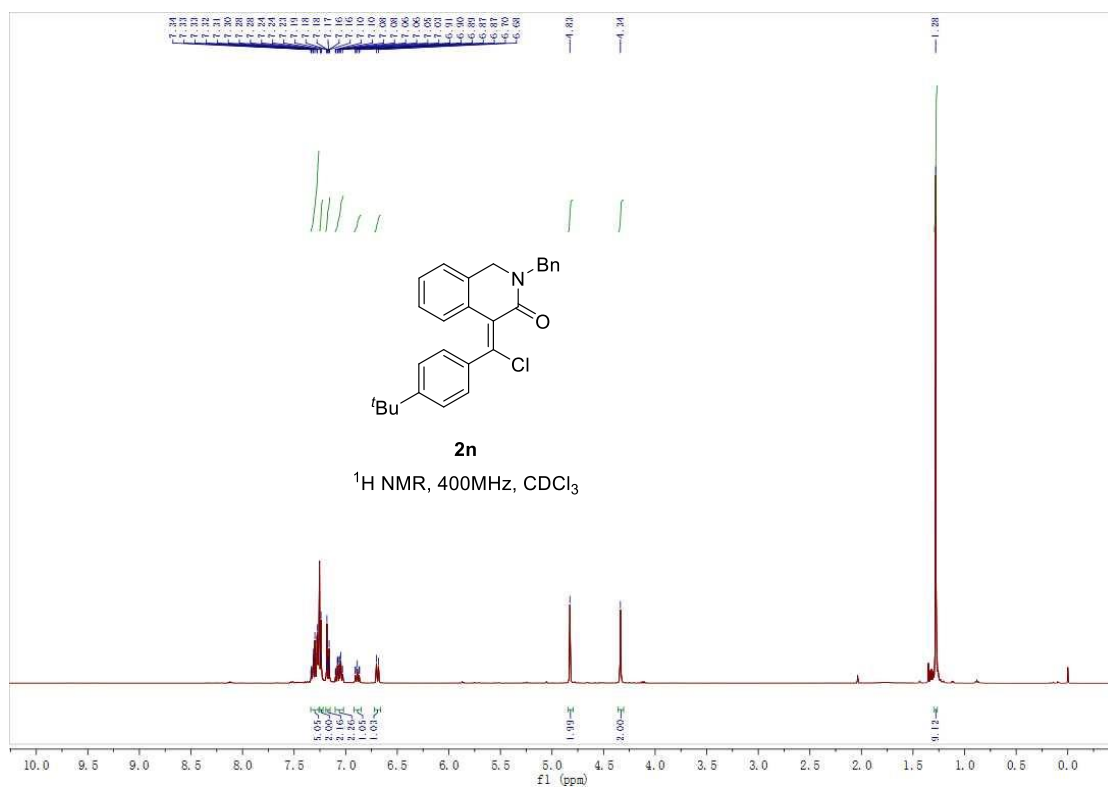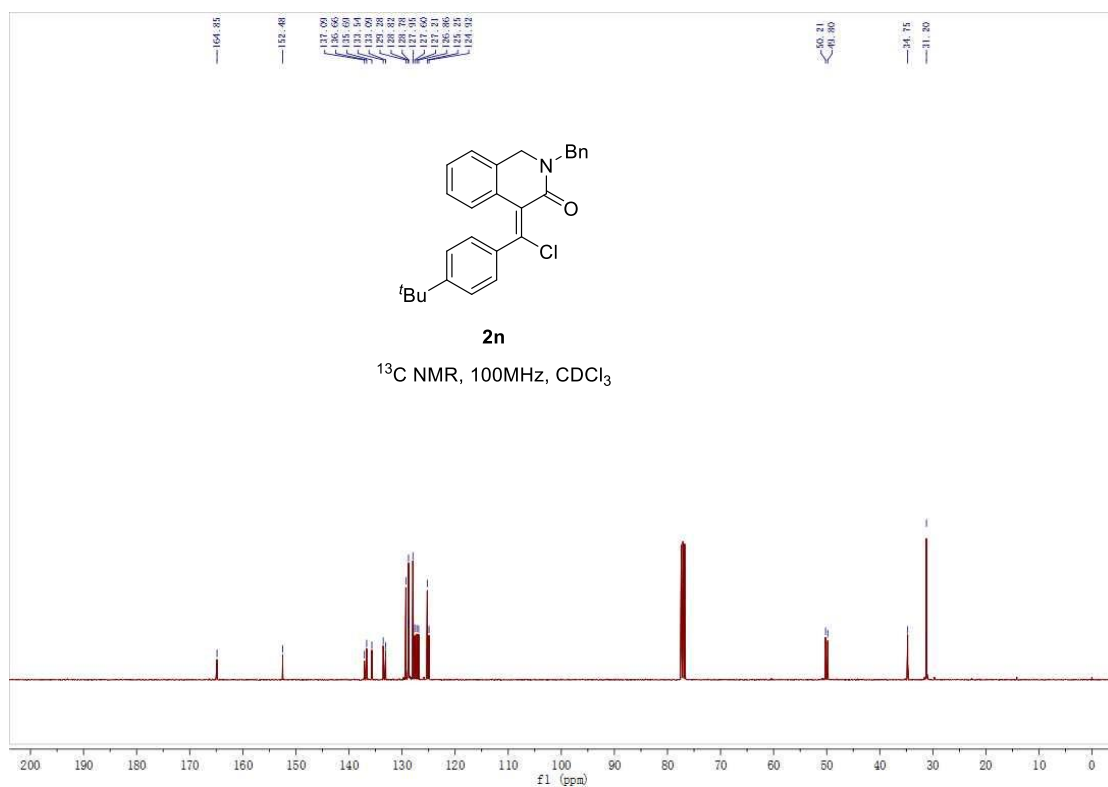

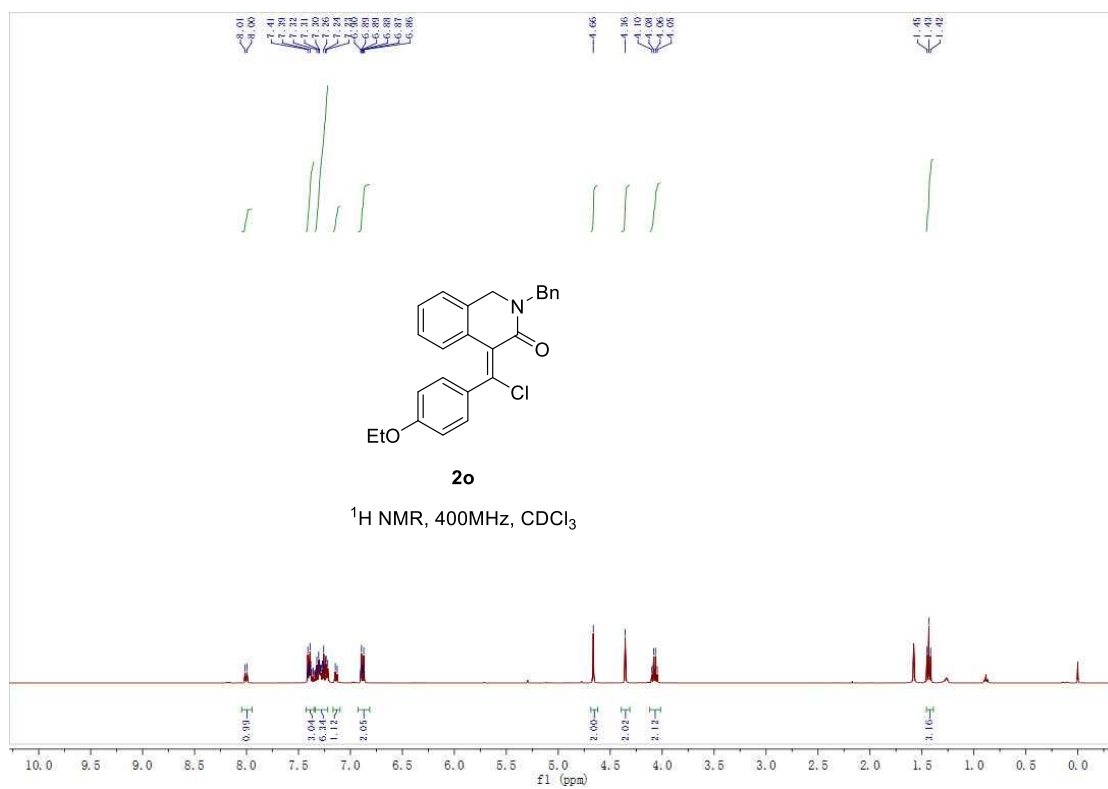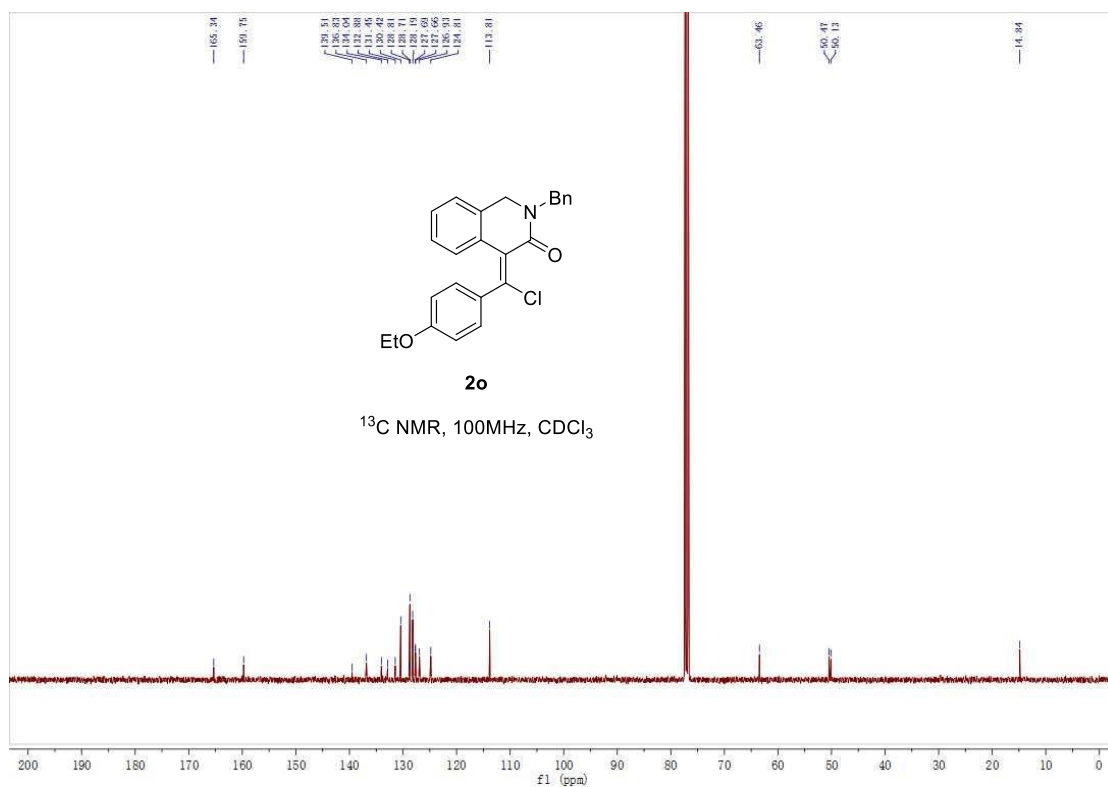

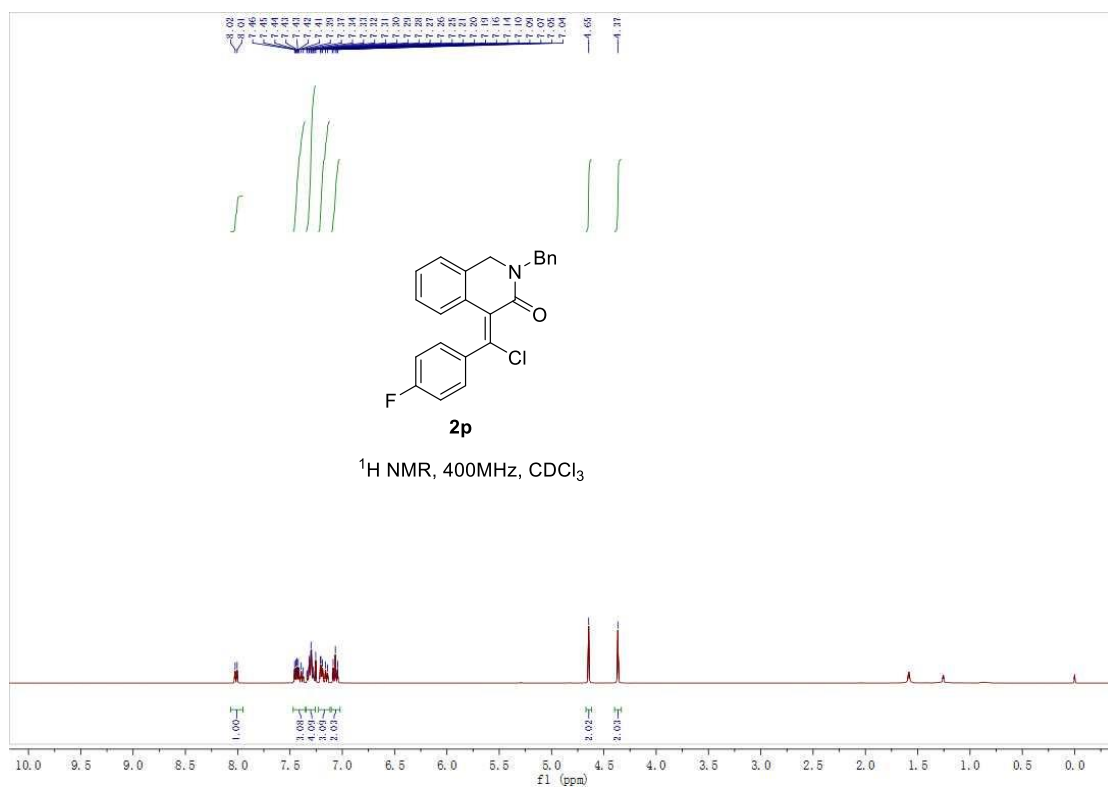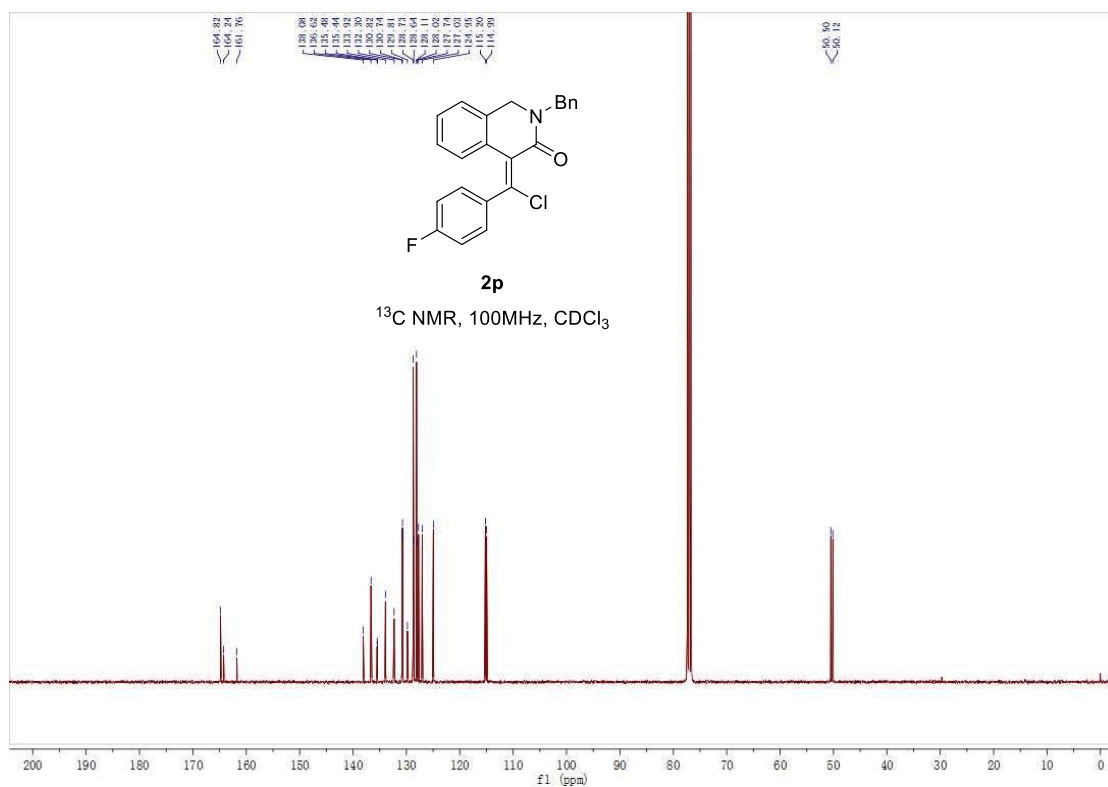

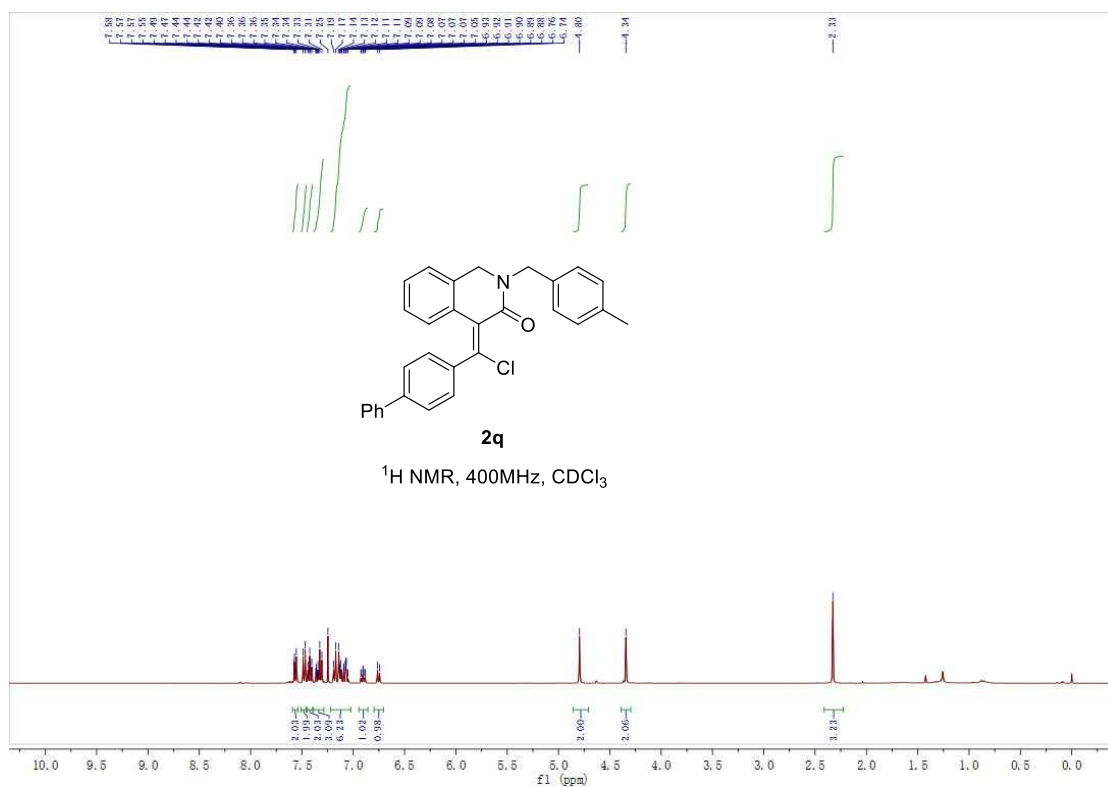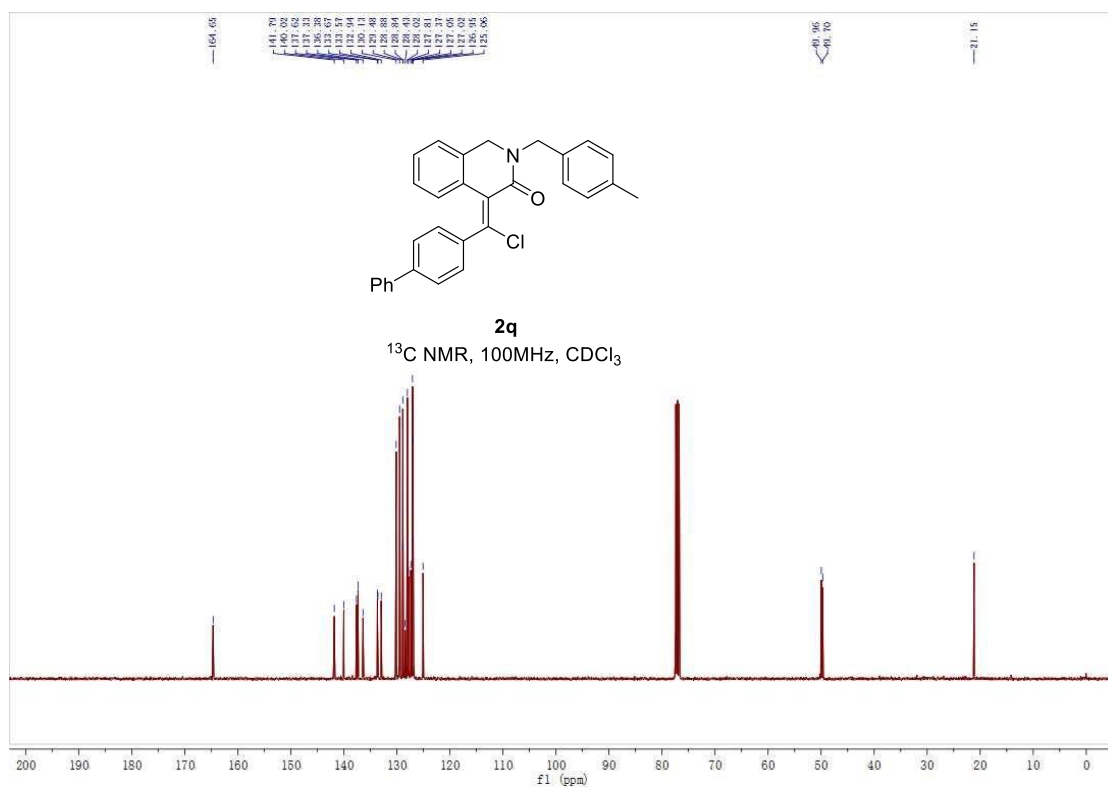

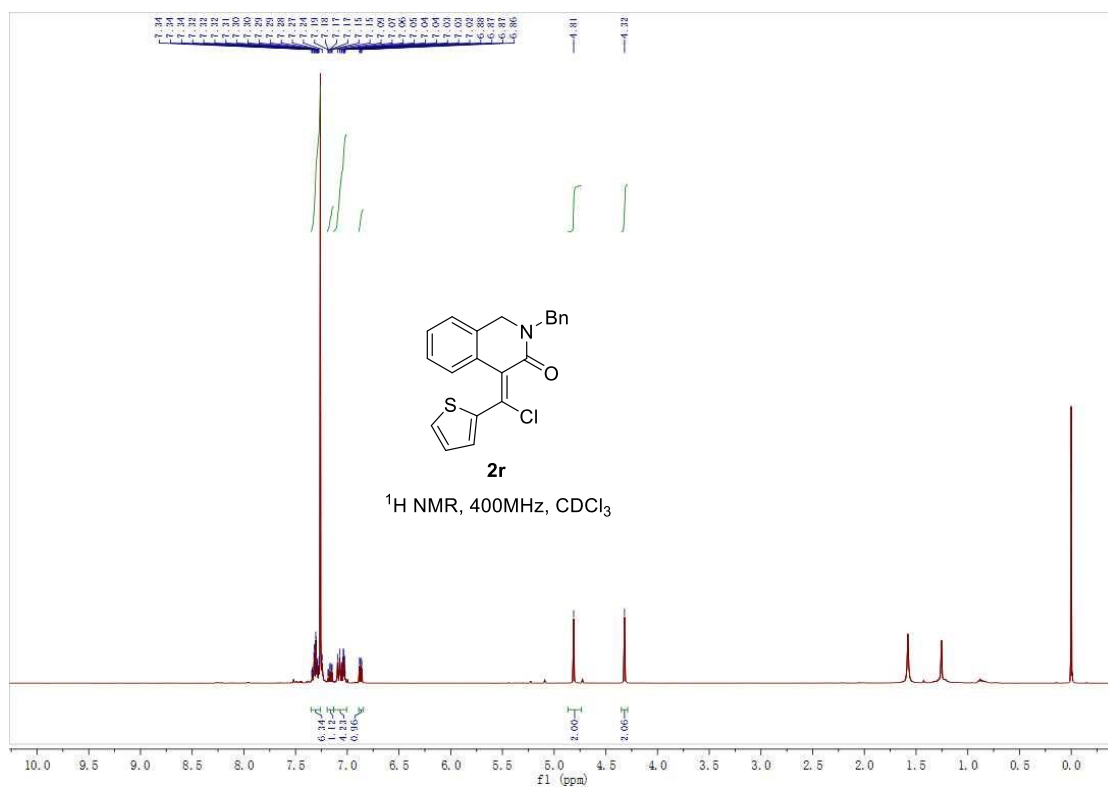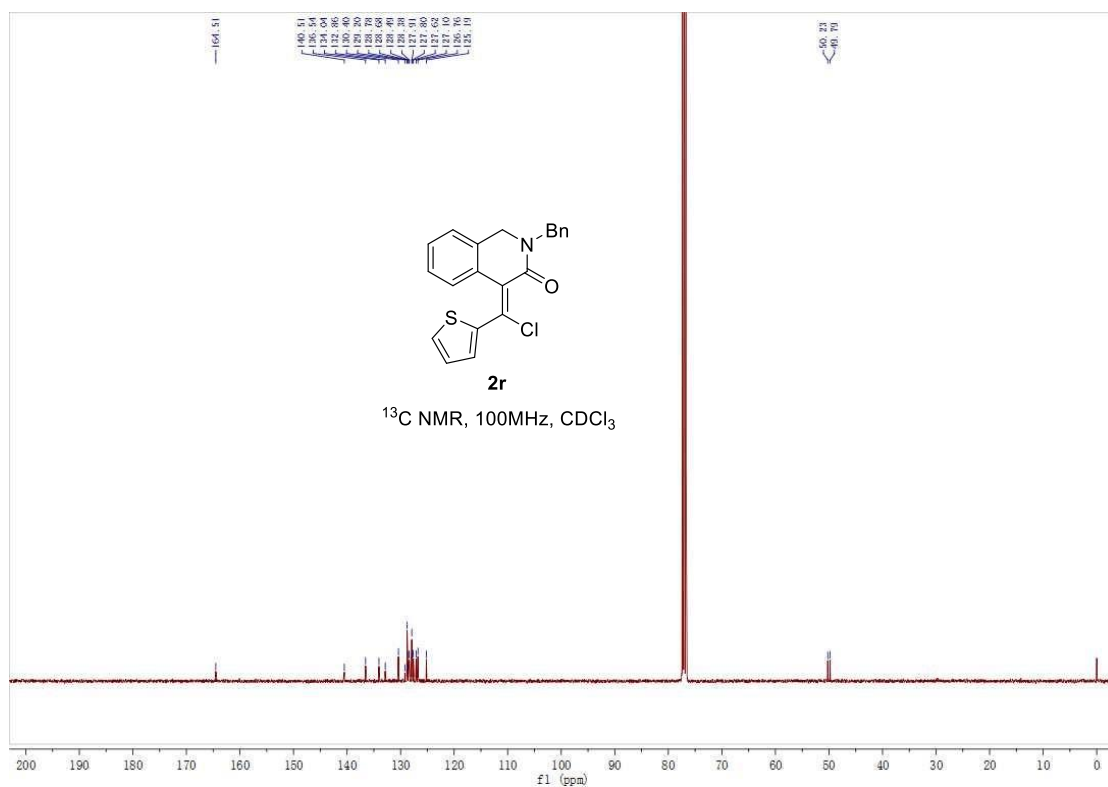

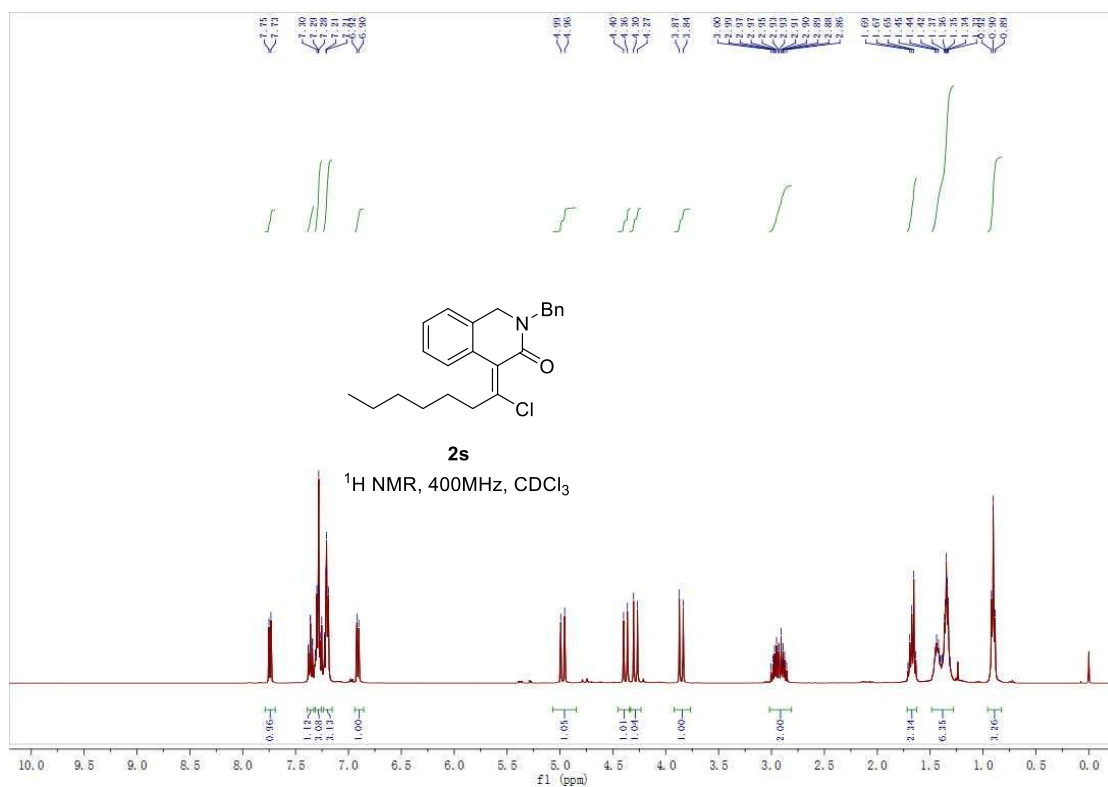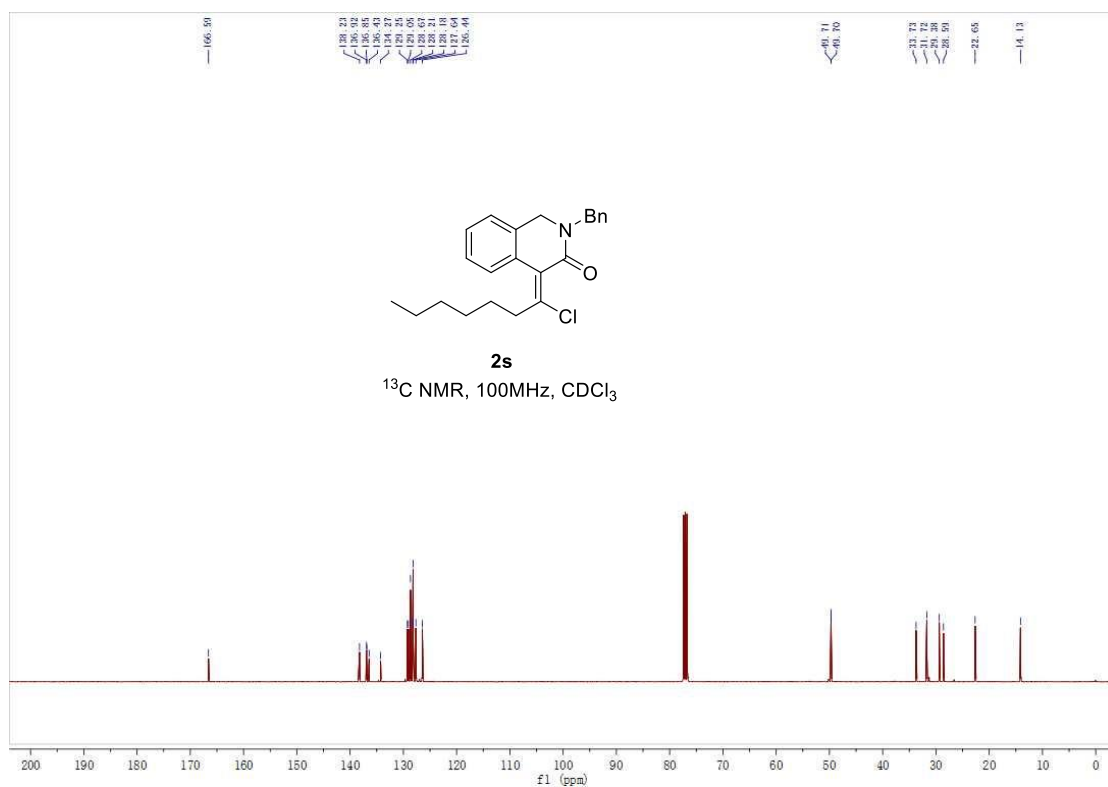

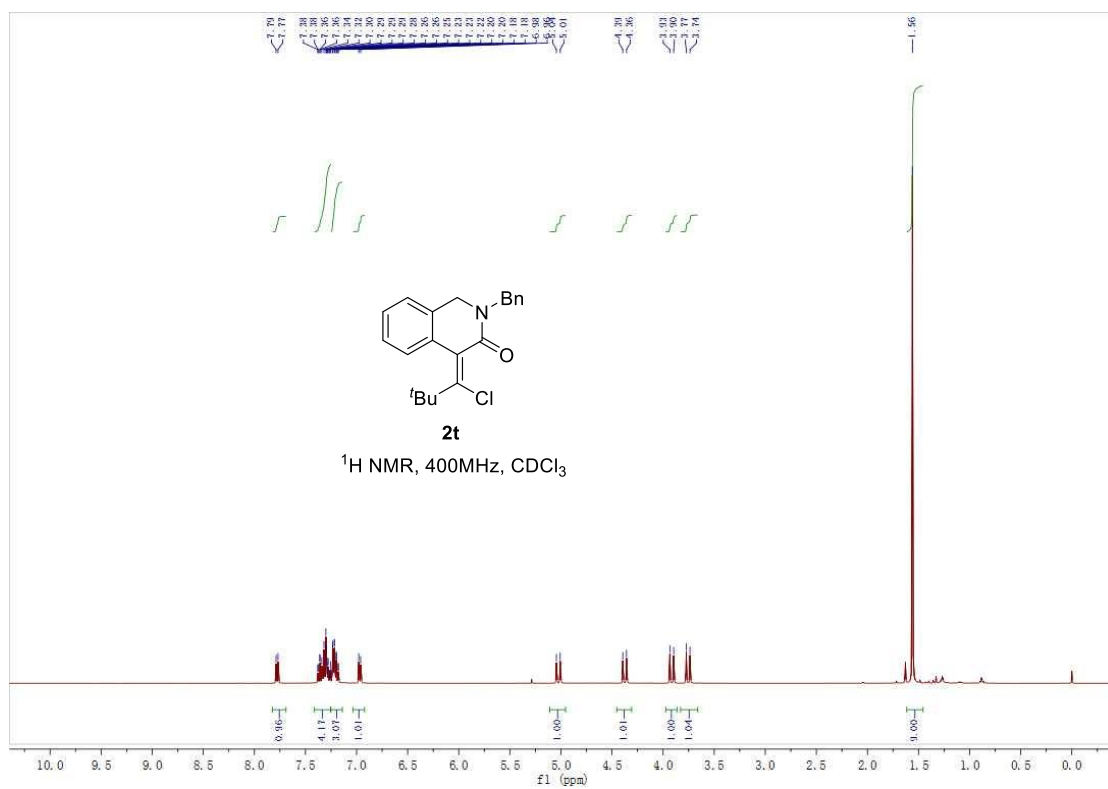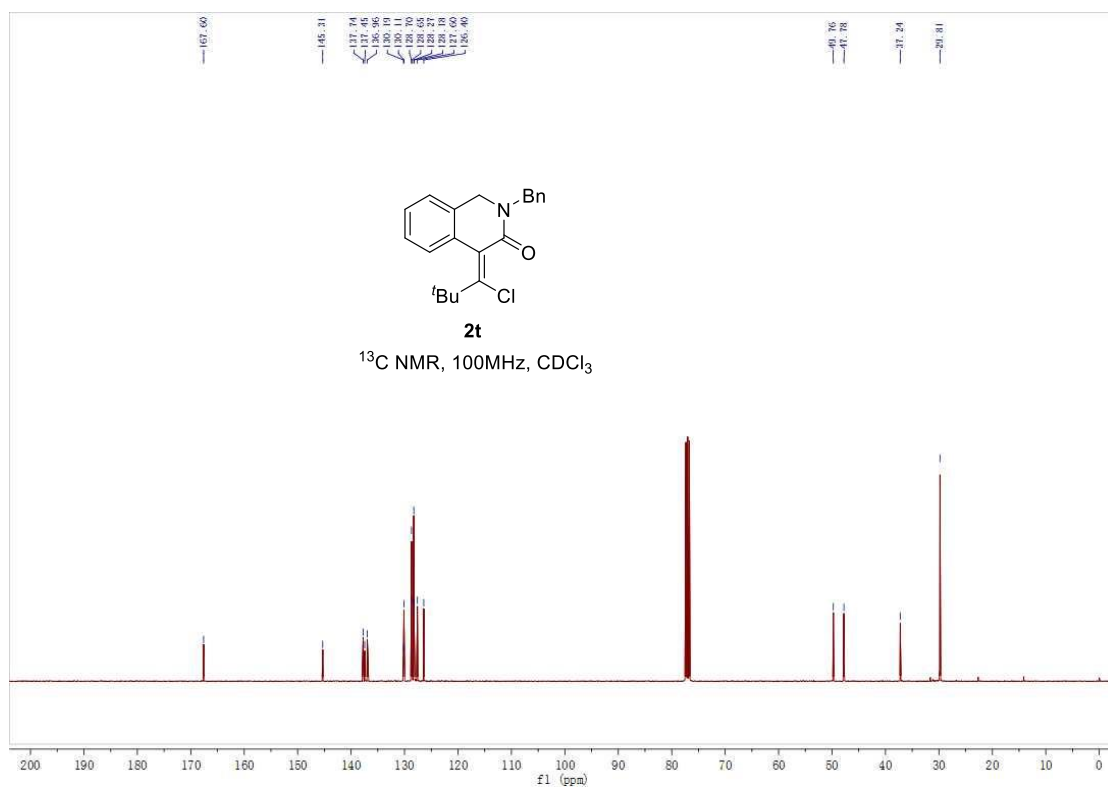





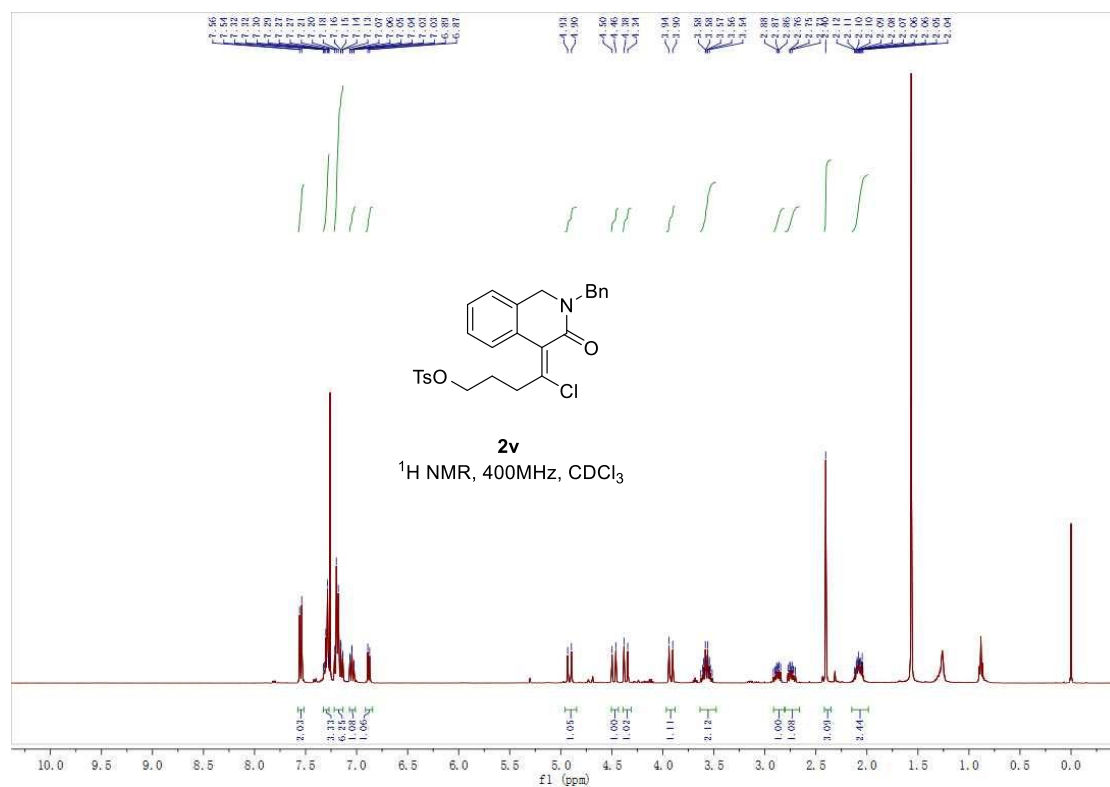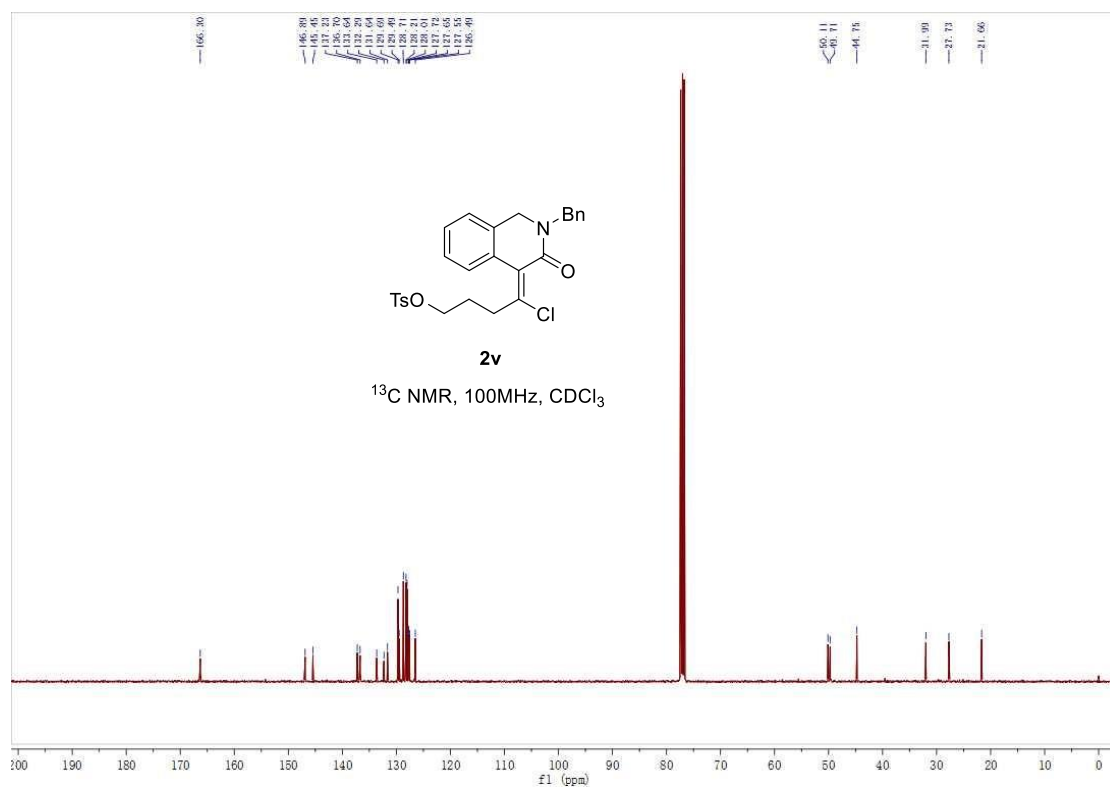

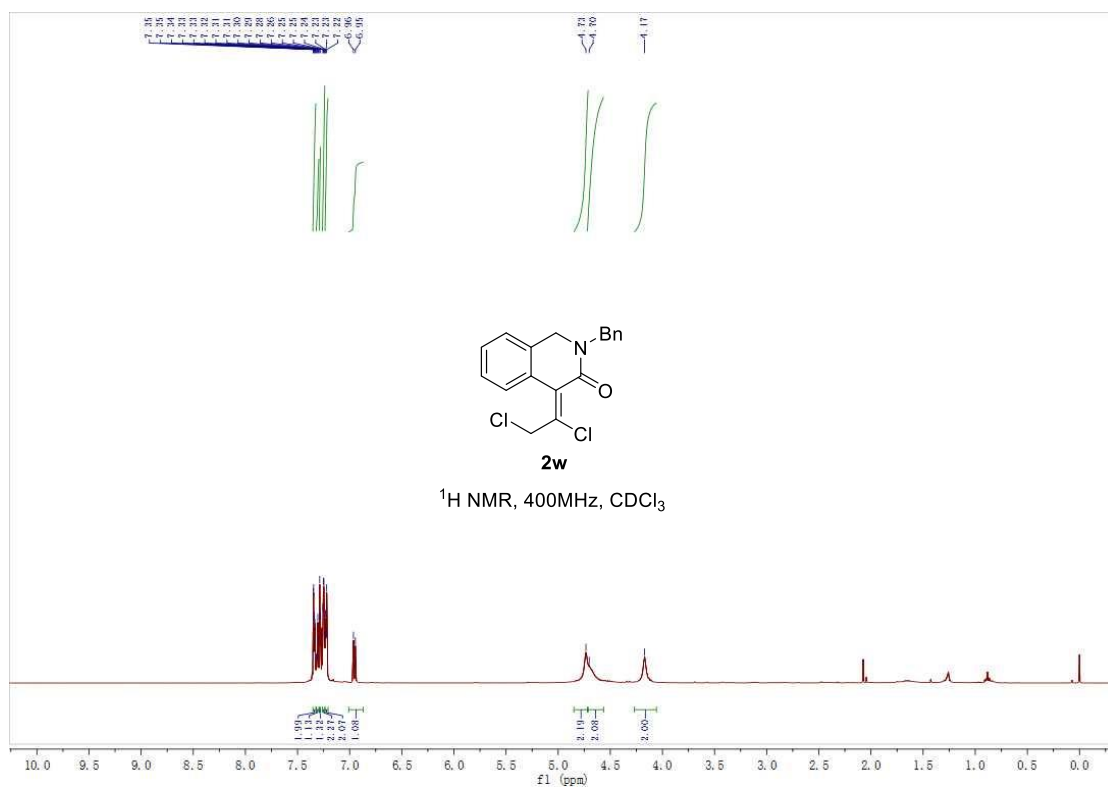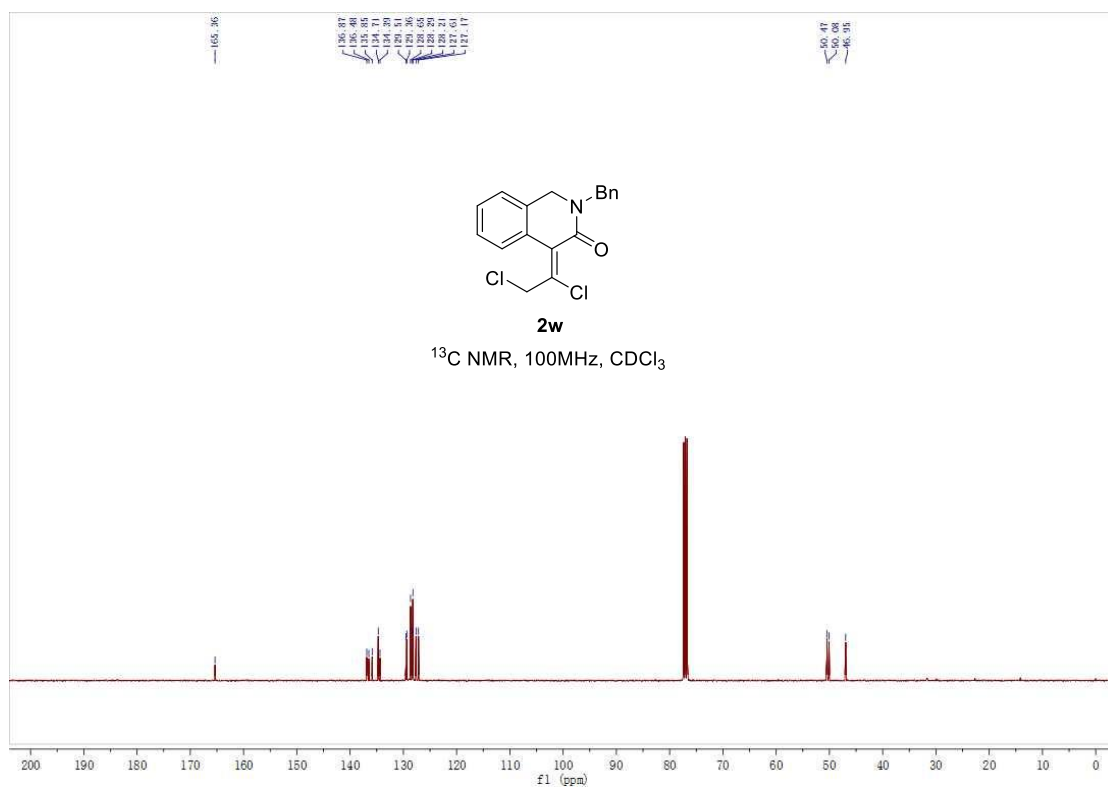



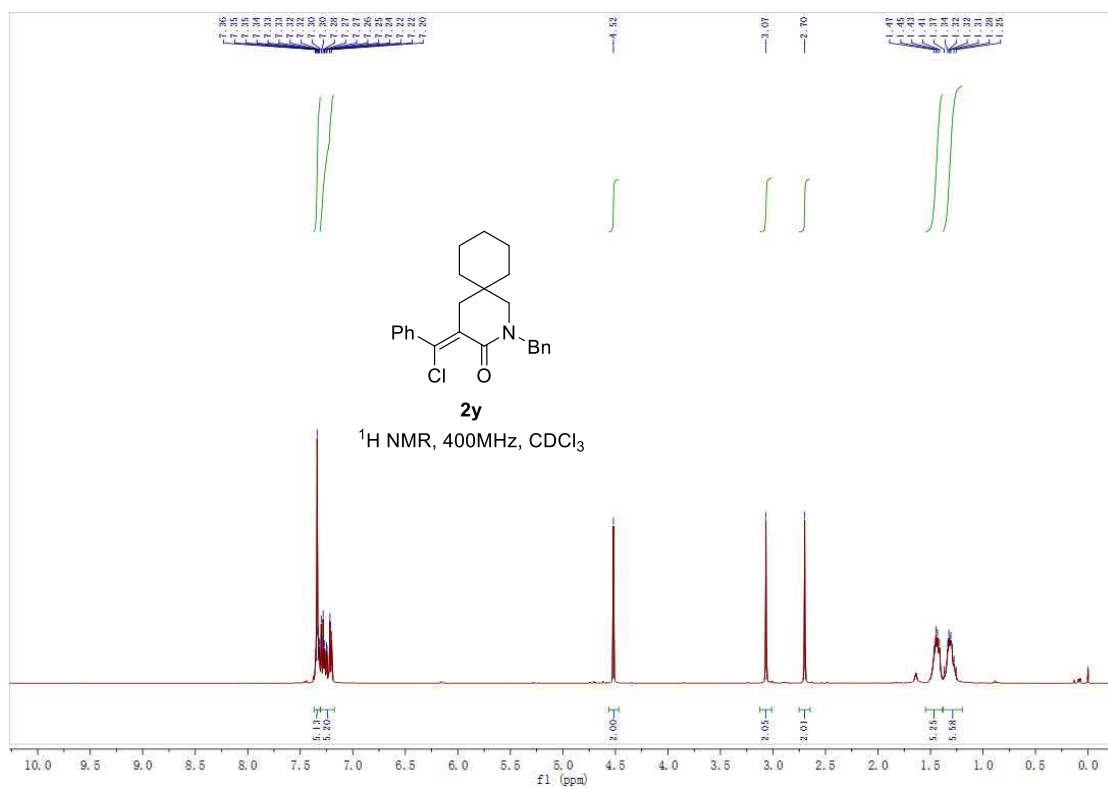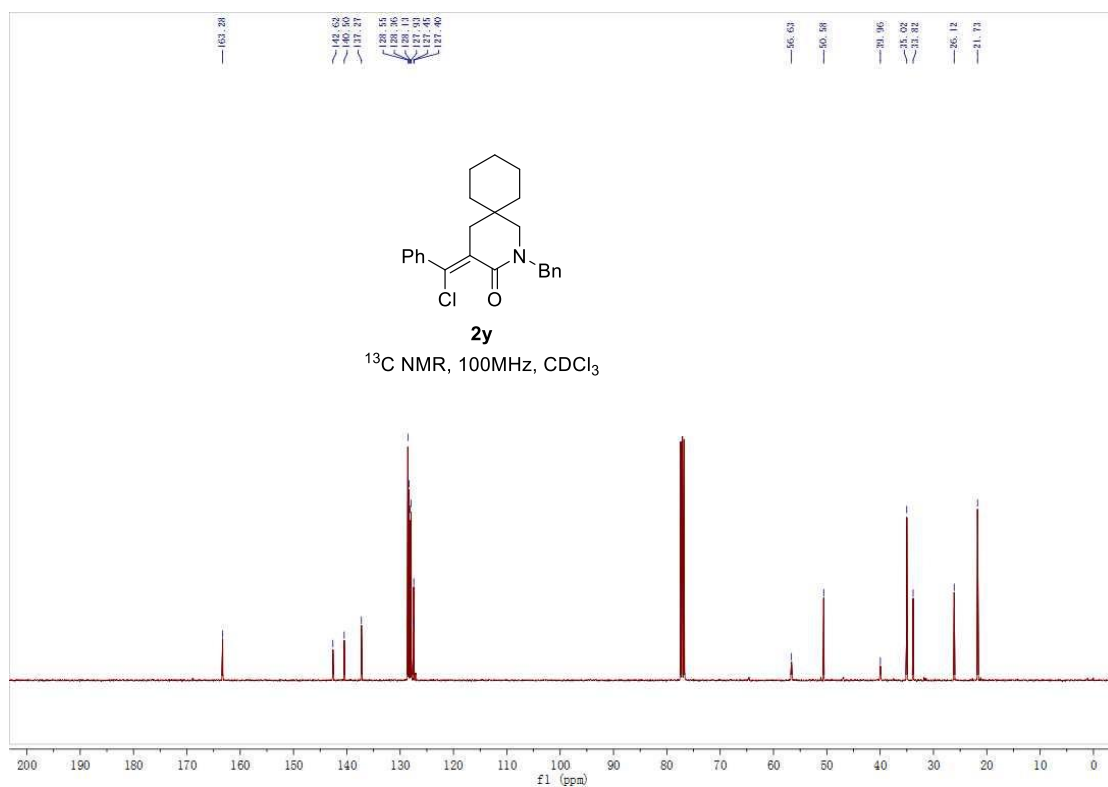

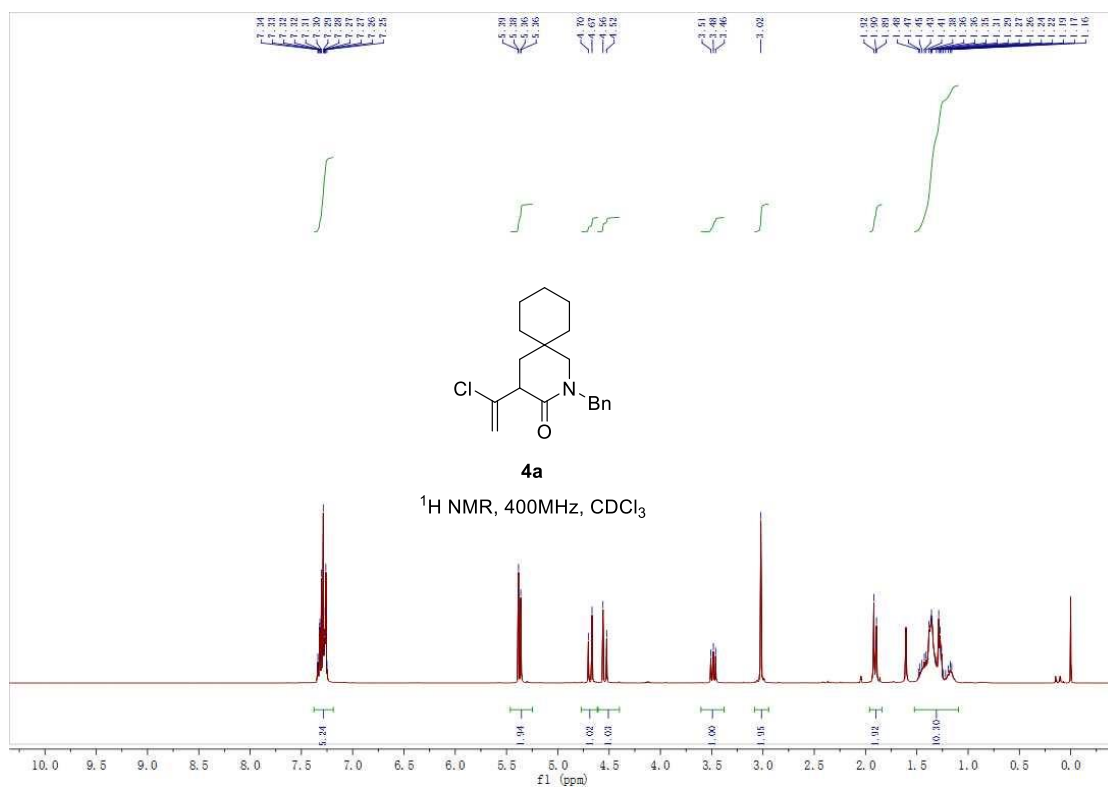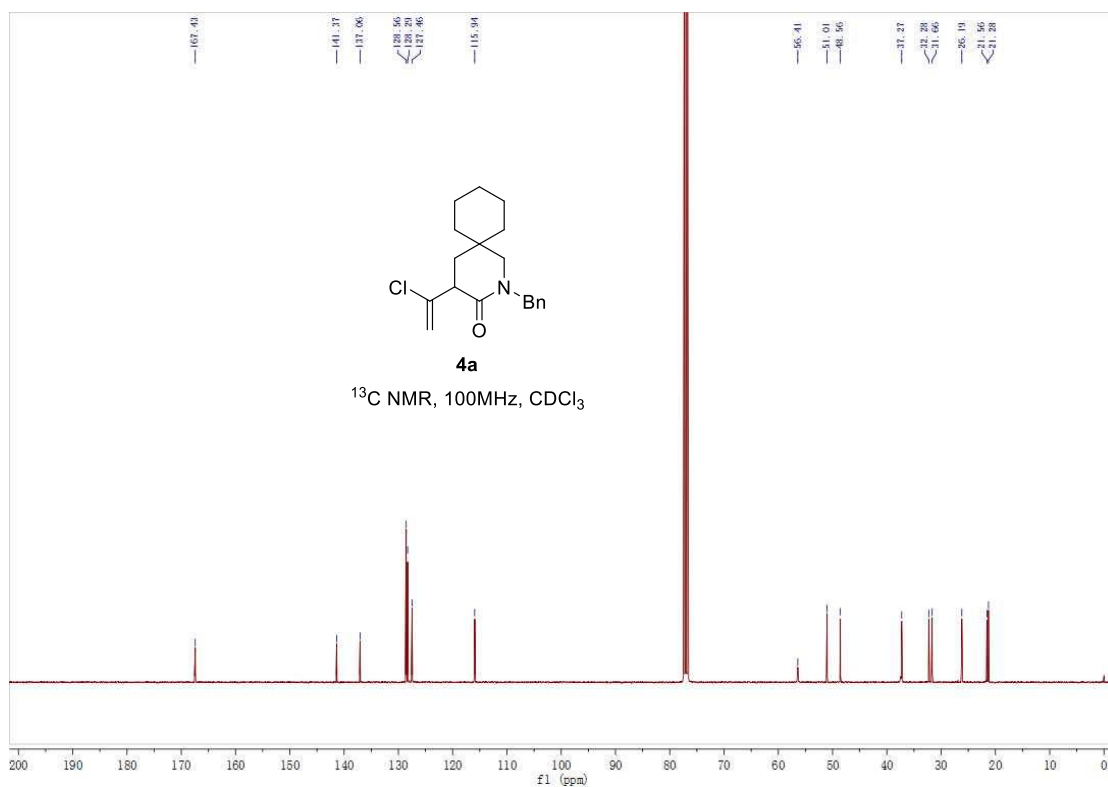

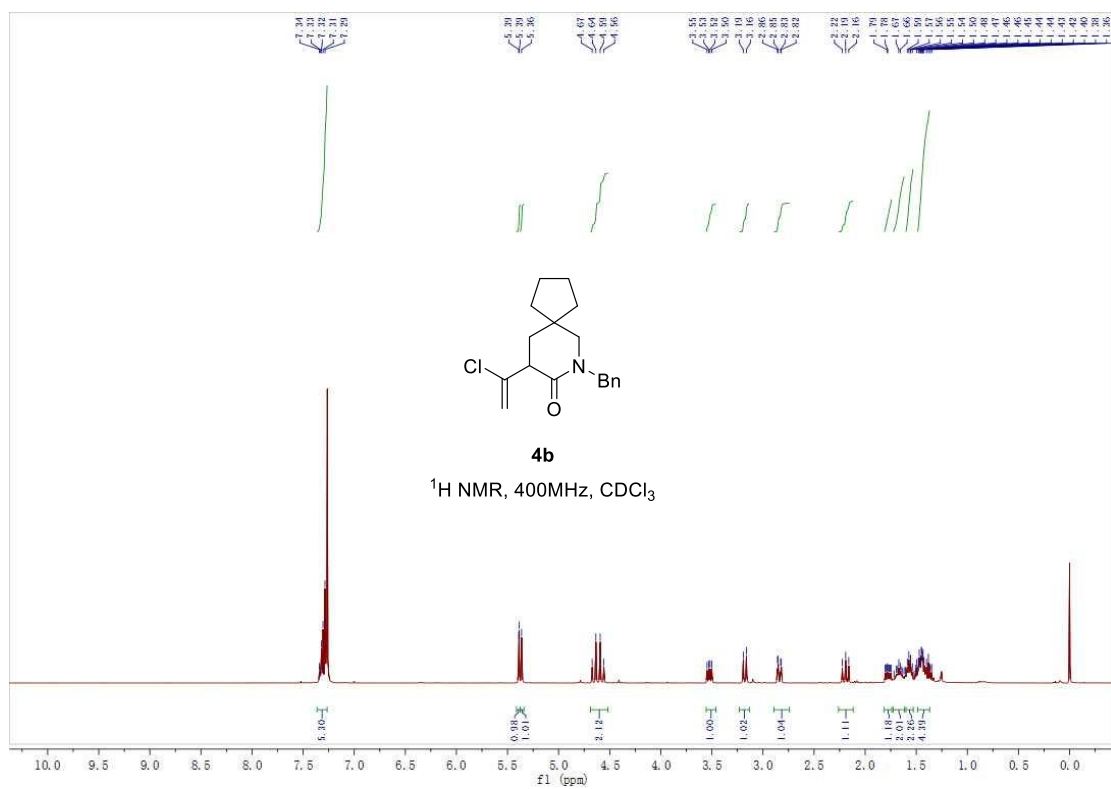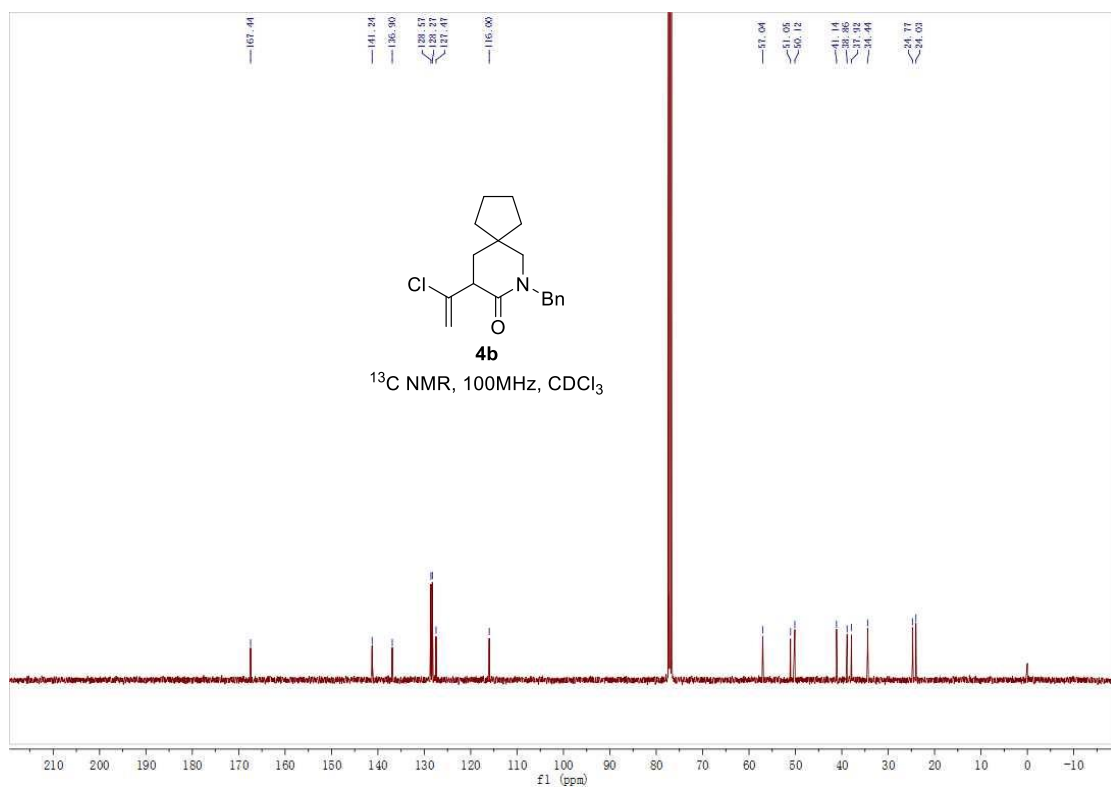

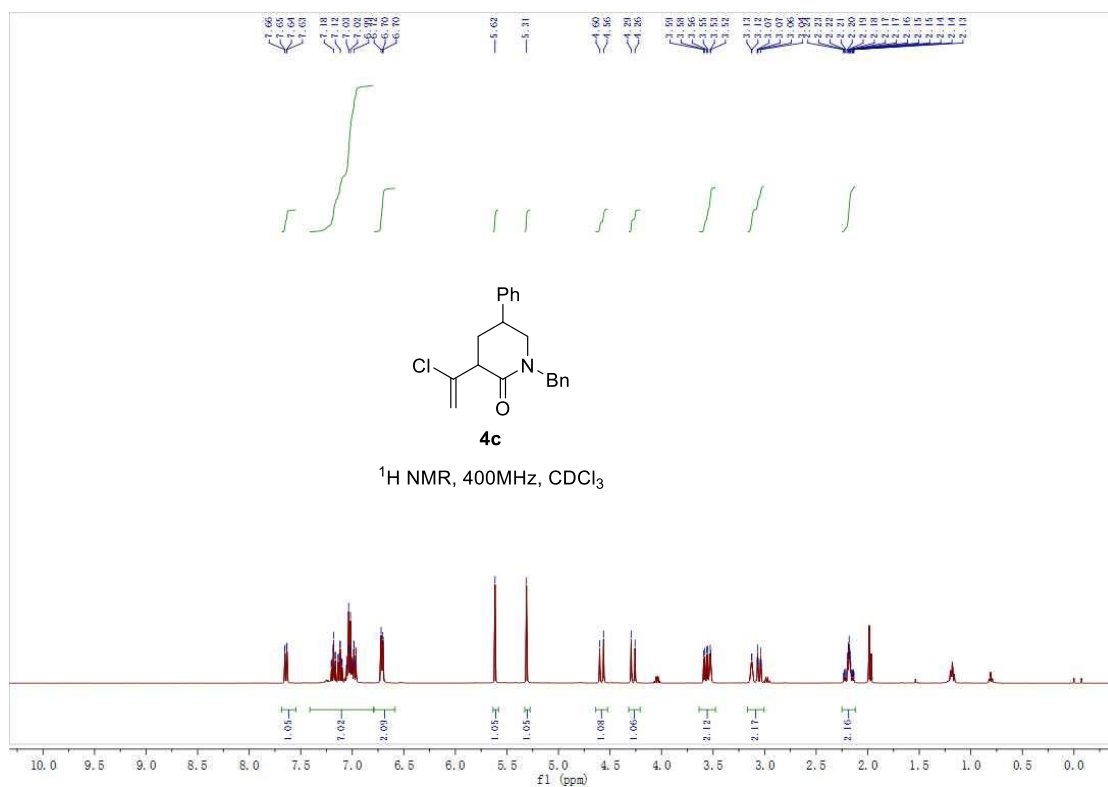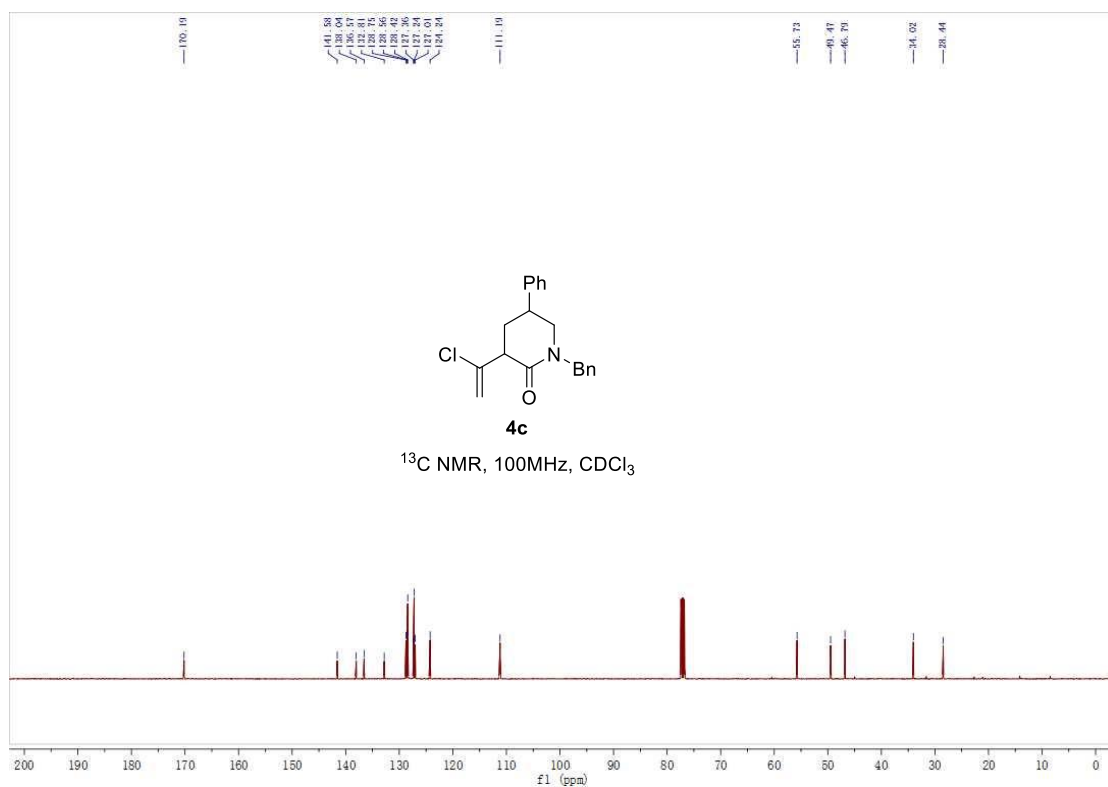



## 7. X-ray Crystal Structure and Date of 2p

To get a high quality crystal for X-ray analysis, compound **2p** was dissolved in ethyl acetate and hexane, and was allowed to crystallize via careful evaporation of the solvent. (CCDC: 2361520).

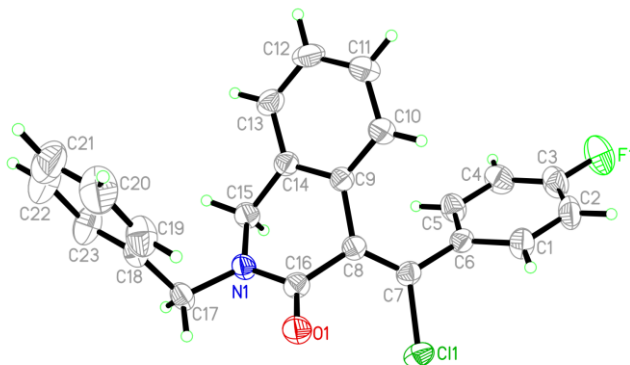

**Figure S2.** ORTEP drawings of **2p** at 30% displacement ellipsoid probability (the hydrogen atoms are omitted for clarity).

**Table S1.** Crystal data and structure refinement for **2p**.

|                                 |                                       |
|---------------------------------|---------------------------------------|
| Empirical formula               | C <sub>23</sub> H <sub>17</sub> ClFNO |
| Formula weight                  | 377.83                                |
| Temperature                     | 273(2)                                |
| Wavelength                      | 0.71073                               |
| Unit cell dimensions            | a=14.9521(12)                         |
|                                 | b=6.7931(5)                           |
|                                 | c=18.8317(16)                         |
|                                 | $\alpha = 90$                         |
|                                 | $\beta = 95.218(5)$                   |
| $\gamma = 90$                   |                                       |
| Volume                          | 1904.8(3)                             |
| Z, Calculated density           | 4, 1.317                              |
| Absorption coefficient          | 0.222                                 |
| F(000)                          | 784                                   |
| Theta range for data collection | 2.172-28.338                          |

|                                   |                                           |
|-----------------------------------|-------------------------------------------|
| Limiting indices                  | -19 < h < 19, -8 < k < 7,<br>-24 < l < 25 |
| Reflections collected / unique    | 12683/4306                                |
| Completeness to theta = 28.51     | 0.967                                     |
| Refinement method                 | none                                      |
| Data / restraints / parameters    | 12683/4306/244                            |
| Goodness-of-fit on F <sup>2</sup> | 1.004                                     |
| Final R indices [I>2sigma(I)]     | 0.0640                                    |
| R indices (all data)              | 0.2036                                    |
| Largest diff. peak and hole       | 0.223/-0.227                              |

## 8. X-ray Crystal Structure and Date of 2x

To get a high quality crystal for X-ray analysis, compound **2x** was dissolved in ethyl acetate and hexane, and was allowed to crystallize via careful evaporation of the solvent. (CCDC: 2361518).

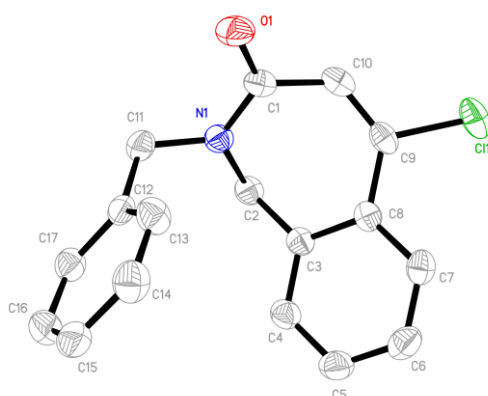

**Figure S3.** ORTEP drawings of **2x** at 30% displacement ellipsoid probability (the hydrogen atoms are omitted for clarity).

**Table S2.** Crystal data and structure refinement for **2x**.

|                   |                                      |
|-------------------|--------------------------------------|
| Empirical formula | C <sub>17</sub> H <sub>14</sub> ClNO |
| Formula weight    | 283.74                               |
| Temperature       | 273(2)                               |
| Wavelength        | 0.71073                              |

|                                   |                                           |
|-----------------------------------|-------------------------------------------|
| Unit cell dimensions              | a=9.6809(3)                               |
|                                   | b=6.2345(2)                               |
|                                   | c=23.1731(8)                              |
|                                   | $\alpha = 90$                             |
|                                   | $\beta = 93.7841(14)$                     |
|                                   | $\gamma = 90$                             |
| Volume                            | 1395.58(8)                                |
| Z, Calculated density             | 4                                         |
| Absorption coefficient            | 0.222                                     |
| F(000)                            | 592                                       |
| Theta range for data collection   | 2.23-28.15                                |
| Limiting indices                  | -12 < h < 12, -8 < k < 8,<br>-30 < l < 30 |
| Reflections collected / unique    | 3470/2767                                 |
| Completeness to theta = 28.51     | 0.967                                     |
| Refinement method                 | none                                      |
| Data / restraints / parameters    | 3470/2767/181                             |
| Goodness-of-fit on F <sup>2</sup> | 1.041                                     |
| Final R indices [I>2sigma(I)]     | 0.0439                                    |
| R indices (all data)              | 0.1302                                    |
| Largest diff. peak and hole       | 0.201/-0.342                              |
